# Supplementary material for: From benzopyrroles to phenylpyrroles: remodeling of indoles enabled by photoredox catalysis
Source: Royal Society of Chemistry journal article supplement (doi:10.1039/d3qo00505d), 2023-01-01

## *Supporting Information*

### **From Benzopyrroles to Phenylpyrroles: Remodeling of Indoles Enabled by Photoredox Catalysis**

Wei Xu,<sup>a,b</sup> Bin Cheng,<sup>\*a</sup> Yaoge Zhang,<sup>c</sup> Lijing Fang,<sup>b</sup> Hongbin Zhai,<sup>d</sup> Cuiping Wang<sup>\*c</sup>  
and Taimin Wang<sup>\*a</sup>

<sup>a</sup> *Institute of Marine Biomedicine, Shenzhen Polytechnic, Shenzhen, 518055, China.*

<sup>b</sup> *Institute of Biomedicine and Biotechnology, Shenzhen Institute of Advanced Technology,  
Chinese Academy of Sciences, Shenzhen, 518055, China*

<sup>c</sup> *School of Chemical Engineering, University of Science and Technology Liaoning, Anshan  
114051, China*

<sup>d</sup> *State Key Laboratory of Chemical Oncogenomics, Peking University Shenzhen Graduate  
School, Shenzhen 518055, China*

E-mails: chengbin@szpt.edu.cn

wangtm@szpt.edu.cn

cuiping1025@126.com

## **Contents**

|                                                                                     |           |
|-------------------------------------------------------------------------------------|-----------|
| <b>General Information.....</b>                                                     | <b>1</b>  |
| <b>General Synthesis of <i>N</i>-Sulfonyl-3-Acyl Indoles.....</b>                   | <b>1</b>  |
| <b>Characterization data of unknown substrates.....</b>                             | <b>2</b>  |
| <b>Photochemical set-up.....</b>                                                    | <b>9</b>  |
| <b>Optimization of reaction conditions.....</b>                                     | <b>11</b> |
| <b>General procedure for the synthesis of 3-(<i>o</i>-aminophenyl)pyrroles.....</b> | <b>13</b> |
| <b>Mechanistic investigation.....</b>                                               | <b>14</b> |
| <b>Characterization data of products.....</b>                                       | <b>16</b> |
| <b>Copies of NMR spectra of unknown substrates and products.....</b>                | <b>29</b> |

## General Information

Reagents were purchased from commercial sources and were used as received unless otherwise noted. Anhydrous  $\text{CH}_2\text{Cl}_2$  was refluxed with  $\text{CaH}_2$  and freshly distilled prior to use. Ultradry *N,N*-dimethylformamide was used as obtained from commercial sources without further purification. Proton and carbon magnetic resonance spectra ( $^1\text{H}$  NMR and  $^{13}\text{C}$  NMR) were recorded on a *JEOL-400YH* ( $^1\text{H}$  NMR at 400 MHz,  $^{13}\text{C}$  NMR at 100 MHz and  $^{19}\text{F}$  NMR at 376 MHz) spectrometer with tetramethylsilane (TMS) or deuterated solvent resonance as the internal standard ( $^1\text{H}$  NMR: TMS at 0.00 ppm;  $^{13}\text{C}$  NMR:  $\text{CDCl}_3$  at 77.0 ppm). All spectra are reported as parts per million.  $^1\text{H}$ ,  $^{13}\text{C}$  and  $^{19}\text{F}$  NMR data are reported as follows: chemical shift (ppm), multiplicity (app = apparent, s = singlet, d = doublet, t = triplet, q = quartet, sept = septet, dd = doublet of doublets, td = triplet of doublets, ddd = double of doublet of doublets, m = multiplet), coupling constants (Hz), and integration. High Resolution Mass Spectra (HRMS) were performed by Analytical Instrument Center at the State Key Laboratory of Chemical Oncogenomics of Peking University Shenzhen Graduate School on an Electron Spray Injection (ESI) mass spectrometer. Melting point was recorded on an SGW® X-4A melting point apparatus.

## General Synthesis of *N*-Sulfonyl-3-Acyl Indoles

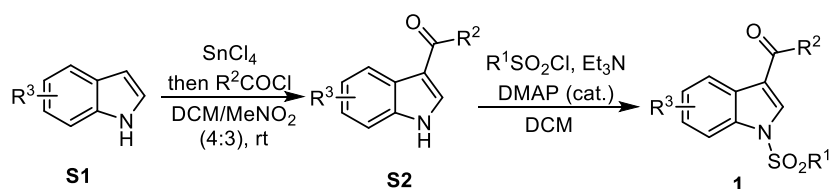

Commercially unavailable 3-acyl indoles **S2** were prepared via acylation of indoles following the practical protocol developed by Ottoni's group in 2001 (Ref: *Org. Lett.* **2001**, 3, 1005-1007), and used directly for *N*-sulfonylation without any purification.

To a solution of indole **S1** (1.0 eq.) in anhydrous  $\text{DCM}$  at  $0\text{ }^\circ\text{C}$  under  $\text{N}_2$  was added  $\text{SnCl}_4$  (1.5 eq.) in a single portion via syringe. After the ice bath was removed, the mixture was stirred vigorously at room temperature for 30 min, and then acyl chloride ( $\text{R}^2\text{COCl}$ , 1.2 eq.) was added in small portions to the dark suspension, followed by the addition of  $\text{MeNO}_2$ . The reaction was quenched with cold water after it was stirred for 2 h at room temperature. Then the mixture was filtered under reduced pressure and the filtrate was extracted with ethyl acetate for three times. The combined organic phases were dried over anhydrous  $\text{Na}_2\text{SO}_4$  and concentrated *in vacuo*, and the residue was used directly for next step.

The crude 3-acyl indole **S2** was suspended in  $\text{DCM}$ , then DMAP (0.1 eq.) and sulfonyl chloride ( $\text{R}^1\text{SO}_2\text{Cl}$ , 2.0 eq.) were added, followed by the addition of triethylamine (3.0 eq.) via

syringe at room temperature. The resulting mixture was stirred for 0.5–12 h for full consumption of 3-acyl indole **S2**, according to the result monitored by TLC. The volatile was carefully removed *in vacuo* before ethyl acetate was added, and the mixture was stirred vigorously for 10 min, then filtered. The filtrate was concentrated *in vacuo* to give a residue, which was purified through column chromatography with petroleum/ether ethyl acetate as the eluent to give the titled product **1**.

## Characterization data of unknown substrates

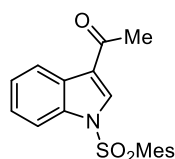

**1c**

1-(1-(mesitylsulfonyl)-1*H*-indol-3-yl)ethan-1-one (**1c**)

white powder, **M. p.** = 112–113 °C; **<sup>1</sup>H NMR** (400 MHz, CDCl<sub>3</sub>): δ 8.36 (dt, *J* = 8.1, 1.1 Hz, 1H), 8.32 (s, 1H), 7.33–7.27 (m, 1H), 7.25–7.18 (m, 2H), 6.98 (s, 2H), 2.58 (s, 3H), 2.54 (s, 6H), 2.29 (s, 3H); **<sup>13</sup>C NMR** (100 MHz, CDCl<sub>3</sub>): δ 193.5, 144.9, 140.3, 134.7, 132.7, 132.6, 131.6, 127.1, 125.3, 124.4, 123.1, 119.5, 111.8, 27.7, 22.5, 21.0; **HRMS** (ESI) *m/z*: calcd for C<sub>19</sub>H<sub>20</sub>NO<sub>3</sub>S<sup>+</sup> [M+H]<sup>+</sup>, 342.1158; found, 342.1156;

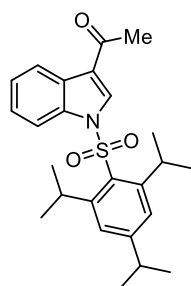

**1d**

1-(1-((2,4,6-triisopropylphenyl)sulfonyl)-1*H*-indol-3-yl)ethan-1-one (**1d**)

white powder, **M. p.** = 137–139 °C; **<sup>1</sup>H NMR** (400 MHz, CDCl<sub>3</sub>): δ 8.35 (dt, *J* = 8.0, 1.1 Hz, 1H), 8.26 (s, 1H), 7.32–7.27 (m, 1H), 7.25–7.17 (m, 4H), 4.16 (sept, *J* = 6.8 Hz, 2H), 2.91 (sept, *J* = 6.9 Hz, 1H), 2.58 (s, 3H), 1.24 (d, *J* = 6.9 Hz, 6H), 1.12 (d, *J* = 6.8 Hz, 12H); **<sup>13</sup>C NMR** (100 MHz, CDCl<sub>3</sub>): δ 193.4, 155.4, 151.5, 135.0, 131.6, 130.3, 126.9, 125.2, 124.5, 124.3, 123.0, 120.1, 111.9, 34.2, 29.6, 27.7, 24.3, 23.3; **HRMS** (ESI) *m/z*: calcd for C<sub>25</sub>H<sub>32</sub>NO<sub>3</sub>S<sup>+</sup> [M+H]<sup>+</sup>, 426.2097; found, 426.2108;

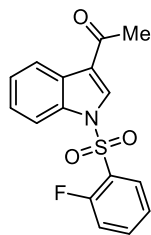

**1f**

1-(1-((2-fluorophenyl)sulfonyl)-1*H*-indol-3-yl)ethan-1-one (**1f**)

white powder, **M. p.** = 115–117 °C; **<sup>1</sup>H NMR** (400 MHz, CDCl<sub>3</sub>): δ 8.38–8.32 (m, 2H), 8.14 (ddd, *J* = 7.9, 7.1, 1.8 Hz, 1H), 7.79–7.71 (m, 1H), 7.62–7.52 (m, 1H), 7.36–7.27 (m, 3H), 7.09 (ddd, *J* = 10.2, 8.4, 1.1 Hz, 1H), 2.59 (s, 3H); **<sup>13</sup>C NMR** (100 MHz, CDCl<sub>3</sub>): δ 193.4, 158.9 (d, *J* = 259.1 Hz), 137.1 (d, *J* = 8.8 Hz), 134.4, 133.0 (d, *J* = 2.9 Hz), 130.3, 127.3, 125.5, 125.2 (d, *J* = 13.3 Hz), 124.8, 124.7, 123.0, 121.0, 117.6 (*J* = 20.7 Hz), 112.6, 27.6; **<sup>19</sup>F NMR** (376 MHz, CDCl<sub>3</sub>): δ -107.4 (m, 1F); **HRMS** (ESI) *m/z*: calcd for C<sub>16</sub>H<sub>13</sub>FNO<sub>3</sub>S<sup>+</sup> [M+H]<sup>+</sup>, 318.0595; found, 318.0591;

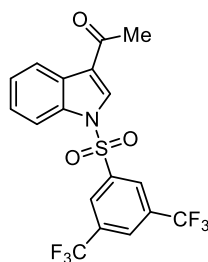

**1h**

1-(1-((3,5-bis(trifluoromethyl)phenyl)sulfonyl)-1*H*-indol-3-yl)ethan-1-one (**1h**)

white powder, **M. p.** = 161–163 °C; **<sup>1</sup>H NMR** (400 MHz, CDCl<sub>3</sub>): δ 8.40 (s, 2H), 8.34 (d, *J* = 7.1 Hz, 1H), 8.18 (s, 1H), 8.10 (s, 1H), 7.94 (d, *J* = 8.0 Hz, 1H), 7.49–7.34 (m, 2H), 2.59 (s, 3H); **<sup>13</sup>C NMR** (100 MHz, CDCl<sub>3</sub>): δ 193.2, 140.0, 134.7, 133.6 (q, *J* = 34.9 Hz), 131.3, 128.2 (q, *J* = 3.6 Hz), 127.7, 127.2 (q, *J* = 3.8 Hz), 126.5, 125.6, 123.6, 123.0, 122.0 (q, *J* = 273.6 Hz), 112.6, 27.9; **<sup>19</sup>F NMR** (376 MHz, CDCl<sub>3</sub>): δ -63.0 (s, 6F); **HRMS** (ESI) *m/z*: calcd for C<sub>18</sub>H<sub>12</sub>F<sub>6</sub>NO<sub>3</sub>S<sup>+</sup> [M+H]<sup>+</sup>, 436.0437; found, 436.0433;

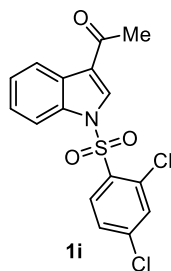

**1i**

1-(1-((2,4-dichlorophenyl)sulfonyl)-1*H*-indol-3-yl)ethan-1-one (**1i**)

white powder, **M. p.** = 102–104 °C; **<sup>1</sup>H NMR** (400 MHz, CDCl<sub>3</sub>): δ 8.40–8.34 (m, 2H), 8.28 (d, *J* = 8.5 Hz, 1H), 7.58–7.54 (m, 1H), 7.52–7.45 (m, 2H), 7.35 (td, *J* = 7.6, 1.2 Hz, 1H), 7.30 (ddd, *J* =

8.6, 7.3, 1.4 Hz, 1H), 2.60 (s, 3H);  $^{13}\text{C}$  NMR (100 MHz,  $\text{CDCl}_3$ ):  $\delta$  193.4, 141.9, 134.4, 133.91, 133.87, 133.5, 132.8, 132.5, 127.9, 127.5, 125.7, 125.1, 123.5, 120.7, 112.4, 27.8; HRMS (ESI)  $m/z$ : calcd for  $\text{C}_{16}\text{H}_{12}\text{Cl}_2\text{NO}_3\text{S}^+$   $[\text{M}+\text{H}]^+$ , 367.9909; found, 367.9908;

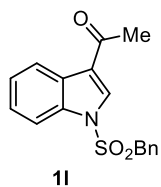

1-(1-(benzylsulfonyl)-1*H*-indol-3-yl)ethan-1-one (**11**)

white powder, **M. p.** = 104–106 °C;  $^1\text{H}$  NMR (400 MHz,  $\text{CDCl}_3$ ):  $\delta$  8.41–8.34 (m, 1H), 7.88–7.80 (m, 1H), 7.44–7.36 (m, 3H), 7.33–7.27 (m, 1H), 7.17 (t,  $J$  = 7.8 Hz, 2H), 6.86–6.78 (m, 2H), 4.56 (s, 2H), 2.29 (s, 3H);  $^{13}\text{C}$  NMR (100 MHz,  $\text{CDCl}_3$ ):  $\delta$  193.4, 135.2, 133.5, 130.3, 129.6, 128.8, 127.1, 126.2, 125.8, 124.9, 123.2, 120.2, 112.6, 59.8, 27.4; HRMS (ESI)  $m/z$ : calcd for  $\text{C}_{17}\text{H}_{16}\text{NO}_3\text{S}^+$   $[\text{M}+\text{H}]^+$ , 314.0845; found, 314.0843;

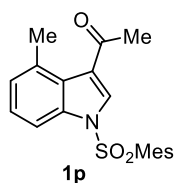

1-(1-(mesitylsulfonyl)-4-methyl-1*H*-indol-3-yl)ethan-1-one (**1p**)

light yellow crystal, **M. p.** = 143–144 °C;  $^1\text{H}$  NMR (400 MHz,  $\text{CDCl}_3$ ):  $\delta$  8.32 (s, 1H), 7.12–7.06 (m, 1H), 7.06–6.99 (m, 2H), 6.96 (s, 2H), 2.71 (s, 3H), 2.61 (s, 3H), 2.52 (s, 6H), 2.27 (s, 3H);  $^{13}\text{C}$  NMR (100 MHz,  $\text{CDCl}_3$ ):  $\delta$  193.1, 144.8, 140.2, 135.3, 134.0, 133.1, 132.6, 131.7, 126.4, 125.8, 125.3, 121.8, 109.3, 29.0, 22.7, 22.5, 21.0; HRMS (ESI)  $m/z$ : calcd for  $\text{C}_{20}\text{H}_{22}\text{NO}_3\text{S}^+$   $[\text{M}+\text{H}]^+$ , 356.1315; found, 356.1323;

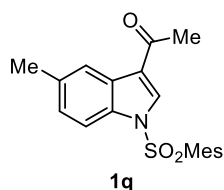

1-(1-(mesitylsulfonyl)-5-methyl-1*H*-indol-3-yl)ethan-1-one (**1q**)

brown powder, **M. p.** = 142–144 °C;  $^1\text{H}$  NMR (400 MHz,  $\text{CDCl}_3$ ):  $\delta$  8.28 (s, 1H), 8.16 (dt,  $J$  = 1.8, 0.8 Hz, 1H), 7.10–7.01 (m, 2H), 6.97 (s, 2H), 2.57 (s, 3H), 2.53 (s, 6H), 2.41 (s, 3H), 2.29 (s, 3H);  $^{13}\text{C}$  NMR (100 MHz,  $\text{CDCl}_3$ ):  $\delta$  193.7, 144.8, 140.3, 134.3, 132.9, 132.8, 132.6, 131.7, 127.3, 126.7, 122.9, 119.3, 111.4, 27.7, 22.5, 21.3, 21.0; HRMS (ESI)  $m/z$ : calcd for  $\text{C}_{20}\text{H}_{22}\text{NO}_3\text{S}^+$   $[\text{M}+\text{H}]^+$ , 356.1315; found, 356.1309;

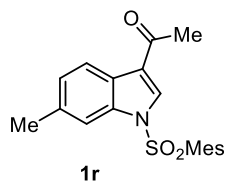

1-(1-(mesitylsulfonyl)-6-methyl-1*H*-indol-3-yl)ethan-1-one (**1r**)

clear crystal, **M. p.** = 166–168 °C; **<sup>1</sup>H NMR** (400 MHz, CDCl<sub>3</sub>): δ 8.24–8.18 (m, 2H), 7.13 (ddd, *J* = 8.1, 1.5, 0.7 Hz, 1H), 7.04 (dt, *J* = 1.6, 0.8 Hz, 1H), 6.99 (s, 2H), 2.56 (s, 3H), 2.55 (s, 6H), 2.35 (s, 3H), 2.31 (s, 3H); **<sup>13</sup>C NMR** (100 MHz, CDCl<sub>3</sub>): δ 193.6, 144.9, 140.3, 135.5, 135.2, 132.6, 132.2, 131.8, 126.0, 124.8, 122.7, 119.7, 112.0, 27.7, 22.6, 21.9, 21.1; **HRMS** (ESI) *m/z*: calcd for C<sub>20</sub>H<sub>22</sub>NO<sub>3</sub>S<sup>+</sup> [M+H]<sup>+</sup>, 356.1315; found, 356.1318;

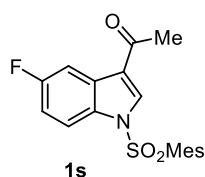

1-(5-fluoro-1-(mesitylsulfonyl)-1*H*-indol-3-yl)ethan-1-one (**1s**)

white powder, **M. p.** = 154–155 °C; **<sup>1</sup>H NMR** (400 MHz, CDCl<sub>3</sub>): δ 8.32 (s, 1H), 8.05 (dd, *J* = 9.2, 2.6 Hz, 1H), 7.14 (dd, *J* = 9.0, 4.3 Hz, 1H), 7.00 (s, 2H), 6.96 (td, *J* = 9.0, 2.6 Hz, 1H), 2.57 (s, 3H), 2.54 (s, 6H), 2.31 (s, 3H); **<sup>13</sup>C NMR** (100 MHz, CDCl<sub>3</sub>): δ 193.2, 160.3 (d, *J* = 241.4 Hz), 145.2, 140.3, 133.9, 132.7, 131.4, 131.0, 128.3 (d, *J* = 11.0 Hz), 119.4 (d, *J* = 4.2 Hz), 113.6 (d, *J* = 26.1 Hz), 112.8 (d, *J* = 9.4 Hz), 108.9 (d, *J* = 25.2 Hz), 27.6, 22.6, 21.1; **<sup>19</sup>F NMR** (376 MHz, CDCl<sub>3</sub>): δ -117.6 (m, 1F); **HRMS** (ESI) *m/z*: calcd for C<sub>19</sub>H<sub>19</sub>FNO<sub>3</sub>S<sup>+</sup> [M+H]<sup>+</sup>, 360.1064; found, 360.1076;

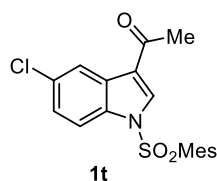

1-(5-chloro-1-(mesitylsulfonyl)-1*H*-indol-3-yl)ethan-1-one (**1t**)

brown powder, **M. p.** = 160–162 °C; **<sup>1</sup>H NMR** (400 MHz, CDCl<sub>3</sub>): δ 8.37 (d, *J* = 2.0 Hz, 1H), 8.30 (s, 1H), 7.18 (dd, *J* = 8.9, 2.1 Hz, 1H), 7.12 (dd, *J* = 8.8, 0.7 Hz, 1H), 6.99 (s, 2H), 2.57 (s, 3H), 2.52 (s, 6H), 2.30 (s, 3H); **<sup>13</sup>C NMR** (100 MHz, CDCl<sub>3</sub>): δ 193.1, 145.2, 140.3, 133.5, 133.0, 132.7, 131.3, 130.5, 128.2, 125.7, 122.8, 118.9, 112.8, 27.6, 22.5, 21.0; **HRMS** (ESI) *m/z*: calcd for C<sub>19</sub>H<sub>19</sub>ClNO<sub>3</sub>S<sup>+</sup> [M+H]<sup>+</sup>, 376.0769; found, 376.0776;

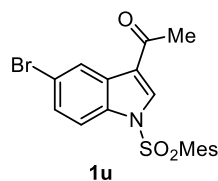

1-(5-bromo-1-(mesitylsulfonyl)-1*H*-indol-3-yl)ethan-1-one (**1u**)

brown powder, **M. p.** = 178–179 °C; **<sup>1</sup>H NMR** (400 MHz, CDCl<sub>3</sub>): δ 8.53 (d, *J* = 2.0 Hz, 1H), 8.28 (s, 1H), 7.31 (dd, *J* = 8.8, 2.0 Hz, 1H), 7.07 (d, *J* = 8.8 Hz, 1H), 6.99 (s, 2H), 2.57 (s, 3H), 2.52 (s, 6H), 2.30 (s, 3H); **<sup>13</sup>C NMR** (100 MHz, CDCl<sub>3</sub>): δ 193.1, 145.2, 140.3, 133.4, 133.3, 132.7, 131.3, 128.7, 128.3, 125.8, 118.8, 118.2, 113.2, 27.6, 22.5, 21.0; **HRMS** (ESI) *m/z*: calcd for C<sub>19</sub>H<sub>19</sub>BrNO<sub>3</sub>S<sup>+</sup> [M+H]<sup>+</sup>, 420.0264; found, 420.0258;

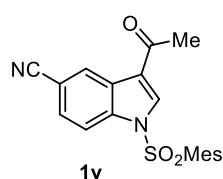

3-acetyl-1-(mesitylsulfonyl)-1*H*-indole-5-carbonitrile (**1v**)

brown powder, **M. p.** = 190–192 °C; **<sup>1</sup>H NMR** (400 MHz, CDCl<sub>3</sub>): δ 8.75 (dd, *J* = 1.7, 0.8 Hz, 1H), 8.38 (s, 1H), 7.48 (dd, *J* = 8.6, 1.6 Hz, 1H), 7.32 (dd, *J* = 8.7, 0.8 Hz, 1H), 7.03 (s, 2H), 2.60 (s, 3H), 2.54 (s, 6H), 2.33 (s, 3H); **<sup>13</sup>C NMR** (100 MHz, CDCl<sub>3</sub>): δ 192.9, 145.7, 140.4, 136.3, 134.1, 132.9, 131.0, 128.4, 128.3, 127.2, 119.0, 118.9, 112.9, 108.2, 27.7, 22.6, 21.1; **HRMS** (ESI) *m/z*: calcd for C<sub>20</sub>H<sub>19</sub>N<sub>2</sub>O<sub>3</sub>S<sup>+</sup> [M+H]<sup>+</sup>, 367.1111; found, 367.1122;

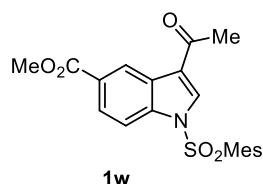

methyl 3-acetyl-1-(mesitylsulfonyl)-1*H*-indole-5-carboxylate (**1w**)

offwhite powder, **M. p.** = 155–157 °C; **<sup>1</sup>H NMR** (400 MHz, CDCl<sub>3</sub>): δ 9.04 (d, *J* = 1.8 Hz, 1H), 8.38 (s, 1H), 7.94 (dd, *J* = 8.8, 1.7 Hz, 1H), 7.26 (d, *J* = 8.8 Hz, 1H), 6.99 (s, 2H), 3.91 (s, 3H), 2.62 (s, 3H), 2.53 (s, 6H), 2.29 (s, 3H); **<sup>13</sup>C NMR** (100 MHz, CDCl<sub>3</sub>): δ 193.0, 166.8, 145.2, 140.2, 137.0, 133.6, 132.6, 131.2, 126.8, 126.6, 126.4, 125.2, 119.7, 111.6, 52.0, 27.7, 22.4, 21.0; **HRMS** (ESI) *m/z*: calcd for C<sub>21</sub>H<sub>22</sub>NO<sub>5</sub>S<sup>+</sup> [M+H]<sup>+</sup>, 400.1213; found, 400.1212;

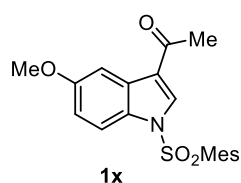

1-(1-(mesitylsulfonyl)-5-methoxy-1*H*-indol-3-yl)ethan-1-one (**1x**)

gray powder, **M. p.** = 144–146 °C; **<sup>1</sup>H NMR** (400 MHz, CDCl<sub>3</sub>): δ 8.27 (s, 1H), 7.85 (d, *J* = 2.5 Hz, 1H), 7.07 (dd, *J* = 8.9, 0.6 Hz, 1H), 6.98 (s, 2H), 6.83 (dd, *J* = 9.0, 2.6 Hz, 1H), 3.84 (s, 3H), 2.57 (s, 3H), 2.53 (s, 6H), 2.30 (s, 3H); **<sup>13</sup>C NMR** (100 MHz, CDCl<sub>3</sub>): δ 193.7, 157.3, 144.9, 140.3, 133.1, 132.7, 131.7, 129.3, 128.2, 119.4, 115.3, 112.6, 104.5, 55.7, 27.6, 22.5, 21.1; **HRMS** (ESI) *m/z*: calcd for C<sub>20</sub>H<sub>22</sub>NO<sub>4</sub>S<sup>+</sup> [M+H]<sup>+</sup>, 372.1264; found, 372.1260;

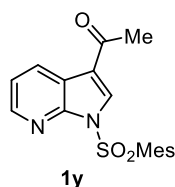

1-(1-(mesitylsulfonyl)-1*H*-pyrrolo[2,3-*b*]pyridin-3-yl)ethan-1-one (**1y**)

white powder, **M. p.** = 133–134 °C; **<sup>1</sup>H NMR** (400 MHz, CDCl<sub>3</sub>): δ 8.56 (dd, *J* = 8.0, 1.7 Hz, 1H), 8.49 (s, 1H), 8.26 (dd, *J* = 4.8, 1.7 Hz, 1H), 7.21 (dd, *J* = 7.9, 4.7 Hz, 1H), 6.96 (s, 2H), 2.71 (s, 6H), 2.60 (s, 3H), 2.27 (s, 3H); **<sup>13</sup>C NMR** (100 MHz, CDCl<sub>3</sub>): δ 193.3, 147.3, 145.8, 144.7, 141.3, 132.2, 132.0, 131.4, 131.3, 120.1, 119.7, 117.6, 27.2, 22.8, 21.0; **HRMS** (ESI) *m/z*: calcd for C<sub>18</sub>H<sub>19</sub>N<sub>2</sub>O<sub>3</sub>S<sup>+</sup> [M+H]<sup>+</sup>, 343.1111; found, 343.1123;

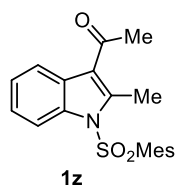

1-(1-(mesitylsulfonyl)-2-methyl-1*H*-indol-3-yl)ethan-1-one (**1z**)

brown powder, **M. p.** = 124–126 °C; **<sup>1</sup>H NMR** (400 MHz, CDCl<sub>3</sub>): δ 8.17–8.09 (m, 1H), 7.97–7.88 (m, 1H), 7.34–7.27 (m, 2H), 6.95 (s, 2H), 2.64 (s, 3H), 2.57 (s, 3H), 2.38 (s, 6H), 2.29 (s, 3H); **<sup>13</sup>C NMR** (100 MHz, CDCl<sub>3</sub>): δ 195.9, 144.4, 142.9, 139.6, 136.6, 134.4, 132.3, 125.7, 124.4, 123.7, 120.7, 119.3, 114.7, 32.1, 22.2, 21.0, 13.0; **HRMS** (ESI) *m/z*: calcd for C<sub>20</sub>H<sub>22</sub>NO<sub>3</sub>S<sup>+</sup> [M+H]<sup>+</sup>, 356.1315; found, 356.1311;

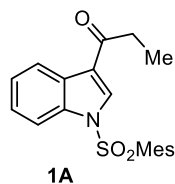

1-(1-(mesitylsulfonyl)-1*H*-indol-3-yl)propan-1-one (**1A**)

brown powder, **M. p.** = 131–133 °C; **<sup>1</sup>H NMR** (400 MHz, CDCl<sub>3</sub>): δ 8.38 (dt, *J* = 8.0, 1.1 Hz, 1H), 8.34 (s, 1H), 7.33–7.27 (m, 1H), 7.23–7.17 (m, 2H), 6.97 (s, 2H), 2.95 (q, *J* = 7.4 Hz, 2H), 2.54 (s, 6H), 2.28 (s, 3H), 1.26 (t, *J* = 7.4 Hz, 3H); **<sup>13</sup>C NMR** (100 MHz, CDCl<sub>3</sub>): δ 196.8, 144.9, 140.2, 134.6, 132.6, 132.0, 131.7, 127.3, 125.2, 124.3, 123.1, 118.8, 111.8, 33.1, 22.5, 21.0, 8.4; **HRMS**



(ESI)  $m/z$ : calcd for  $C_{20}H_{22}NO_3S^+$   $[M+H]^+$ , 356.1315; found, 356.1325;

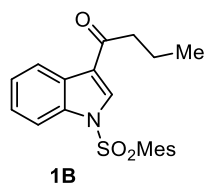

1-(1-(mesitylsulfonyl)-1*H*-indol-3-yl)butan-1-one (**1B**)

colorless crystal, **M. p.** = 131–133 °C;  $^1H$  NMR (400 MHz,  $CDCl_3$ ):  $\delta$  8.38 (dt,  $J$  = 8.0, 1.1 Hz, 1H), 8.34 (s, 1H), 7.33–7.27 (m, 1H), 7.24–7.17 (m, 2H), 6.97 (s, 2H), 2.89 (t,  $J$  = 7.4 Hz, 2H), 2.54 (s, 6H), 2.28 (s, 3H), 1.87–1.76 (m, 2H), 1.03 (t,  $J$  = 7.4 Hz, 3H);  $^{13}C$  NMR (100 MHz,  $CDCl_3$ ):  $\delta$  196.4, 144.9, 140.2, 134.6, 132.6, 132.2, 131.7, 127.3, 125.2, 124.4, 123.2, 119.2, 111.8, 41.9, 22.5, 21.0, 18.1, 13.9; **HRMS** (ESI)  $m/z$ : calcd for  $C_{21}H_{24}NO_3S^+$   $[M+H]^+$ , 370.1471; found, 370.1471;

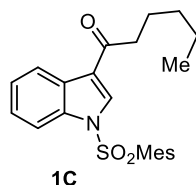

1-(1-(mesitylsulfonyl)-1*H*-indol-3-yl)hexan-1-one (**1C**)

colorless crystal, **M. p.** = 115–117 °C;  $^1H$  NMR (400 MHz,  $CDCl_3$ ):  $\delta$  8.38 (dt,  $J$  = 8.0, 1.1 Hz, 1H), 8.32 (s, 1H), 7.31 (ddd,  $J$  = 8.1, 6.5, 1.8 Hz, 1H), 7.24–7.17 (m, 2H), 6.99 (s, 2H), 2.90 (t,  $J$  = 7.2 Hz, 2H), 2.54 (s, 6H), 2.30 (s, 3H), 1.84–1.73 (m, 2H), 1.44–1.32 (m, 4H), 0.97–0.87 (m, 3H);  $^{13}C$  NMR (100 MHz,  $CDCl_3$ ):  $\delta$  196.7, 144.9, 140.3, 134.7, 132.7, 132.2, 131.8, 127.4, 125.3, 124.4, 123.3, 119.2, 111.8, 40.1, 31.6, 24.5, 22.6, 22.5, 21.1, 13.9; **HRMS** (ESI)  $m/z$ : calcd for  $C_{23}H_{28}NO_3S^+$   $[M+H]^+$ , 398.1784; found, 398.1786;

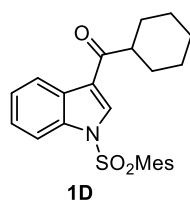

cyclohexyl(1-(mesitylsulfonyl)-1*H*-indol-3-yl)methanone (**1D**)

white powder, **M. p.** = 156–158 °C;  $^1H$  NMR (400 MHz,  $CDCl_3$ ):  $\delta$  8.38 (dt,  $J$  = 8.0, 1.1 Hz, 1H), 8.35 (s, 1H), 7.30 (ddd,  $J$  = 8.1, 7.0, 1.3 Hz, 1H), 7.23–7.12 (m, 2H), 6.98 (s, 2H), 3.07 (tt,  $J$  = 11.7, 3.3 Hz, 1H), 2.54 (s, 6H), 2.30 (s, 3H), 1.99–1.83 (m, 4H), 1.81–1.71 (m, 1H), 1.67–1.55 (m, 2H), 1.49–1.37 (m, 2H), 1.31 (tt,  $J$  = 12.3, 3.2 Hz, 1H);  $^{13}C$  NMR (100 MHz,  $CDCl_3$ ):  $\delta$  200.1, 144.9, 140.3, 134.7, 132.7, 131.9, 131.8, 127.8, 125.3, 124.4, 123.4, 118.0, 111.7, 48.0, 29.7, 25.9, 25.8, 22.6, 21.1; **HRMS** (ESI)  $m/z$ : calcd for  $C_{24}H_{28}NO_3S^+$   $[M+H]^+$ , 410.1784; found, 410.1785

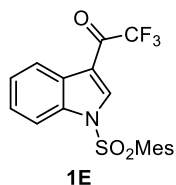

### 2,2,2-trifluoro-1-(1-(mesitylsulfonyl)-1H-indol-3-yl)ethan-1-one (**1E**)

colorless crystal, **M. p.** = 116–118 °C; <sup>1</sup>H NMR (400 MHz, CDCl<sub>3</sub>): δ 8.54 (q, *J* = 1.7 Hz, 1H), 8.36 (dt, *J* = 8.0, 1.0 Hz, 1H), 7.38 (ddd, *J* = 8.1, 7.0, 1.4 Hz, 1H), 7.30 (td, *J* = 8.4, 1.4 Hz, 1H), 7.28–7.23 (m, 1H), 7.01 (s, 2H), 2.56 (s, 6H), 2.31 (s, 3H); <sup>13</sup>C NMR (100 MHz, CDCl<sub>3</sub>): δ 176.0 (q, *J* = 36.3 Hz), 145.5, 140.5, 135.7 (q, *J* = 5.1 Hz), 134.3, 132.9, 131.1, 127.2, 126.3, 125.3, 122.8, 116.4 (q, *J* = 290.9 Hz), 112.2, 111.8, 22.6, 21.1; <sup>19</sup>F NMR (376 MHz, CDCl<sub>3</sub>): δ -72.8 (s, 3F); **HRMS** (ESI) *m/z*: calcd for C<sub>19</sub>H<sub>17</sub>F<sub>3</sub>NO<sub>3</sub>S<sup>+</sup> [M+H]<sup>+</sup>, 396.0876; found, 396.0869;

## Photochemical set-up

All the photoreactions were carried out using ROGER OHSP-350UV parallel photoreactor (provided by Beijing Nuozhi Technology Co., Ltd) equipped with 10 W blue LED for each reaction site, with a circling ethanol-cooled jacket. Light type of light reactor is 3A3A4100–455 nm from Nuozhi Technology.

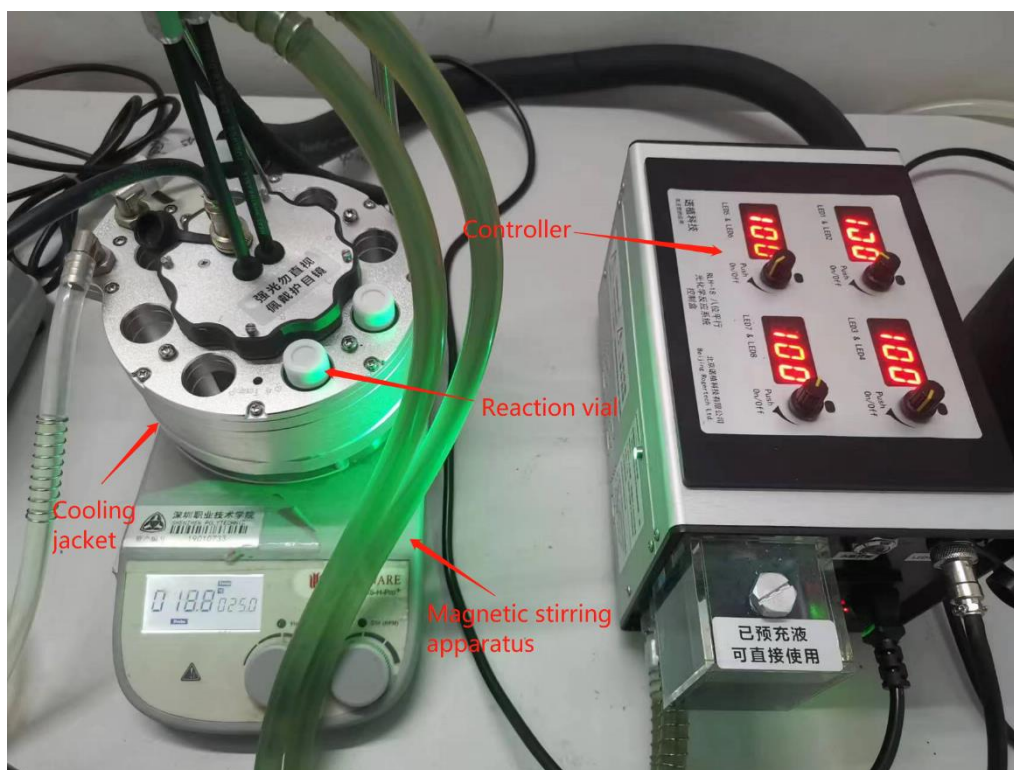

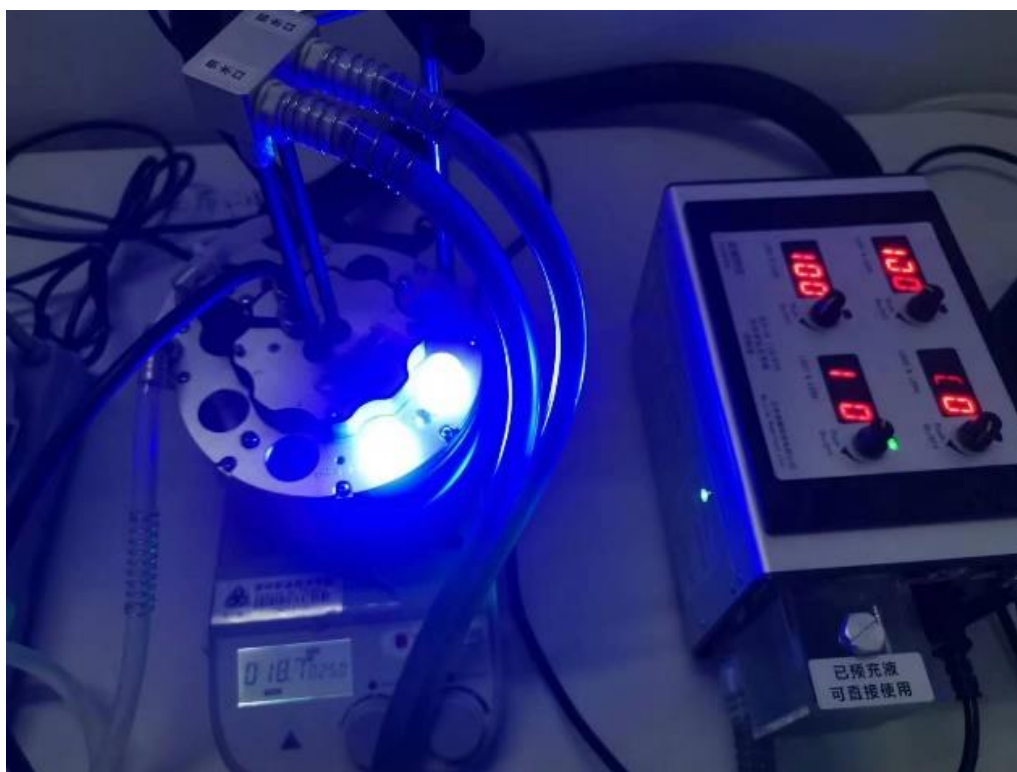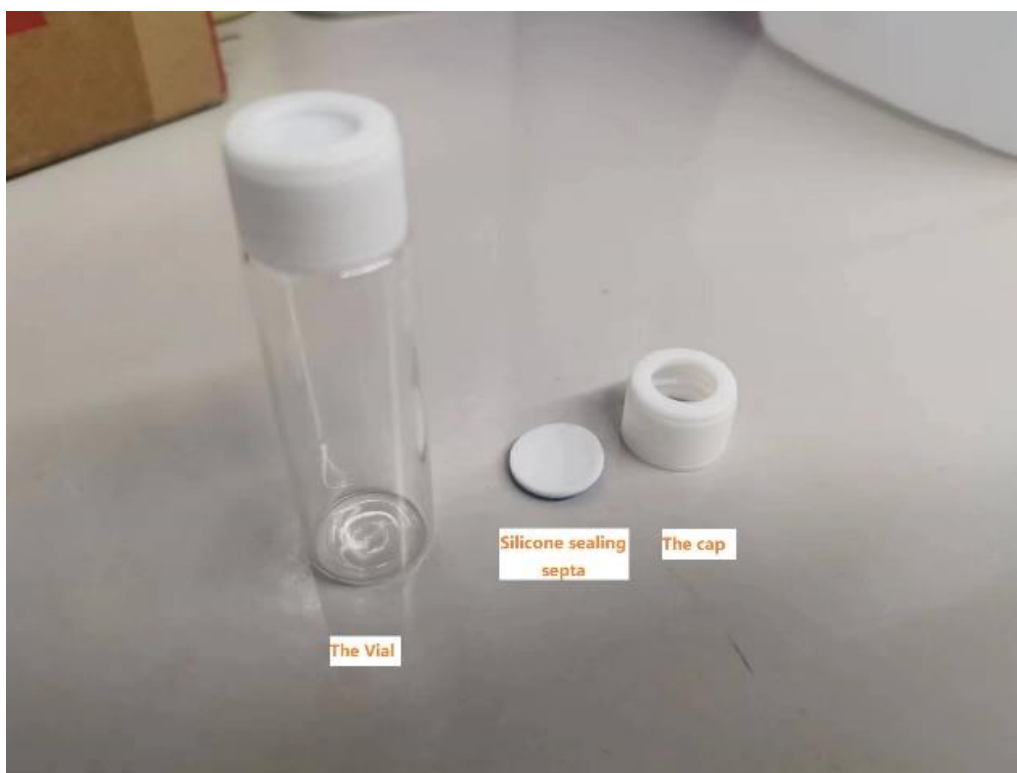

**Figure S1** The photochemical set-up

The emission spectrum (see below) of the blue LED reactor shows a maximum intensity at a wavelength of  $\lambda(\text{emission})_{\text{max}} = 453.0 \text{ nm}$ . The photophysical data of LEDs (Figure S2) was provided by Beijing Nuozhi Technology Co., Ltd.

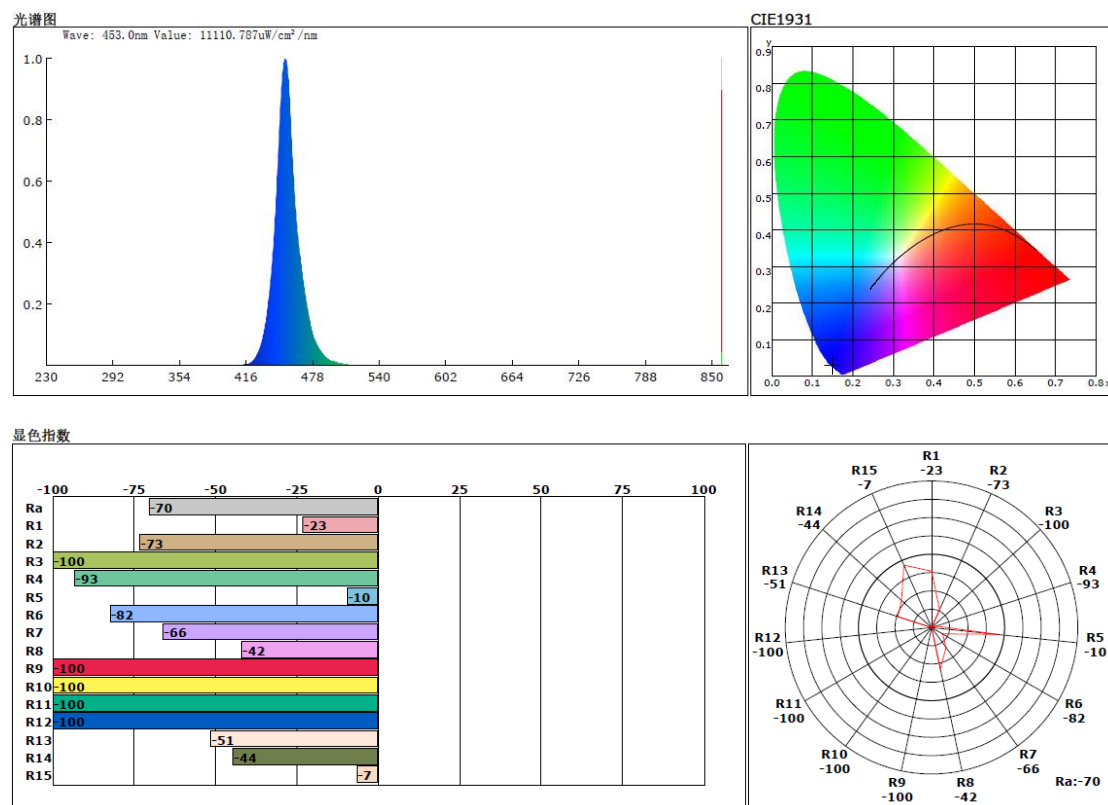

Figure S2 Photophysical property of LEDs used during our exploration

## Optimization of reaction conditions<sup>a</sup>

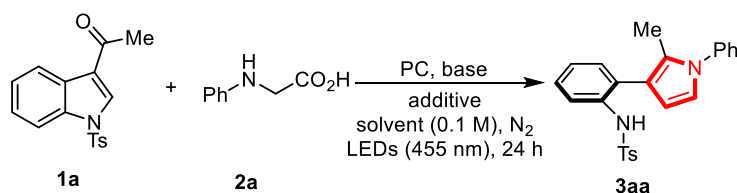

| entry | PC                                                                                                     | solvent | base                           | additive | yield of <b>3aa</b> (%) <sup>b</sup> |
|-------|--------------------------------------------------------------------------------------------------------|---------|--------------------------------|----------|--------------------------------------|
| 1     | 4CzIPN ( <b>PC1</b> )                                                                                  | MeCN    | K <sub>2</sub> CO <sub>3</sub> | none     | 29                                   |
| 2     | <i>fac</i> -Ir(ppy) <sub>3</sub> ( <b>PC2</b> )                                                        | MeCN    | K <sub>2</sub> CO <sub>3</sub> | none     | N.D.                                 |
| 3     | [Ir(dF(CF <sub>3</sub> )ppy) <sub>2</sub> (5,5'-di-CF <sub>3</sub> bpy)]PF <sub>6</sub> ( <b>PC3</b> ) | MeCN    | K <sub>2</sub> CO <sub>3</sub> | none     | 29                                   |
| 4     | [Ir(dFppy) <sub>2</sub> (dtbbpy)]PF <sub>6</sub> ( <b>PC4</b> )                                        | MeCN    | K <sub>2</sub> CO <sub>3</sub> | none     | 22                                   |
| 5     | [Ir(Me(Me)ppy) <sub>2</sub> (dtbbpy)]PF <sub>6</sub> ( <b>PC5</b> )                                    | MeCN    | K <sub>2</sub> CO <sub>3</sub> | none     | 22                                   |
| 6     | [Ir(ppy) <sub>2</sub> (dtbbpy)]PF <sub>6</sub> ( <b>PC6</b> )                                          | MeCN    | K <sub>2</sub> CO <sub>3</sub> | none     | 18                                   |
| 7     | [Ir(dF(CF <sub>3</sub> )ppy) <sub>2</sub> (dtbbpy)]PF <sub>6</sub> ( <b>PC7</b> )                      | MeCN    | K <sub>2</sub> CO <sub>3</sub> | none     | 32                                   |
| 8     | [Ir(dF(CF <sub>3</sub> )ppy) <sub>2</sub> (bpy)]PF <sub>6</sub> ( <b>PC8</b> )                         | MeCN    | K <sub>2</sub> CO <sub>3</sub> | none     | 37 (37) <sup>c</sup>                 |
| 9     | <i>fac</i> -( <i>p</i> -CF <sub>3</sub> -ppy) <sub>3</sub> ( <b>PC9</b> )                              | MeCN    | K <sub>2</sub> CO <sub>3</sub> | none     | N.D.                                 |
| 10    | 4DPAIPN ( <b>PC10</b> )                                                                                | MeCN    | K <sub>2</sub> CO <sub>3</sub> | none     | 9.7                                  |
| 11    | 3DPA2FBN ( <b>PC11</b> )                                                                               | MeCN    | K <sub>2</sub> CO <sub>3</sub> | none     | N.D.                                 |
| 12    | DPZ ( <b>PC12</b> )                                                                                    | MeCN    | K <sub>2</sub> CO <sub>3</sub> | none     | 9.8                                  |
| 13    | CsPbBr <sub>3</sub> ( <b>PC13</b> )                                                                    | MeCN    | K <sub>2</sub> CO <sub>3</sub> | none     | N.D.                                 |
| 14    | <b>PC8</b>                                                                                             | DCE     | K <sub>2</sub> CO <sub>3</sub> | none     | 18                                   |
| 15    | <b>PC8</b>                                                                                             | THF     | K <sub>2</sub> CO <sub>3</sub> | none     | 12                                   |

|                 |            |            |                                    |                                 |                            |
|-----------------|------------|------------|------------------------------------|---------------------------------|----------------------------|
| 16              | <b>PC8</b> | Dioxane    | K <sub>2</sub> CO <sub>3</sub>     | none                            | trace                      |
| 17              | <b>PC8</b> | DMF        | K <sub>2</sub> CO <sub>3</sub>     | none                            | 62                         |
| 18              | <b>PC8</b> | DMSO       | K <sub>2</sub> CO <sub>3</sub>     | none                            | 47                         |
| 19              | <b>PC8</b> | MeOH       | K <sub>2</sub> CO <sub>3</sub>     | none                            | 27                         |
| 20              | <b>PC8</b> | DCM        | K <sub>2</sub> CO <sub>3</sub>     | none                            | 15                         |
| 21              | <b>PC8</b> | EtOAc      | K <sub>2</sub> CO <sub>3</sub>     | none                            | 17                         |
| 22              | <b>PC8</b> | PhMe       | K <sub>2</sub> CO <sub>3</sub>     | none                            | 13                         |
| 23              | <b>PC8</b> | DMC        | K <sub>2</sub> CO <sub>3</sub>     | none                            | N.D.                       |
| 24              | <b>PC8</b> | DME        | K <sub>2</sub> CO <sub>3</sub>     | none                            | 19                         |
| 25              | <b>PC8</b> | Benzene    | K <sub>2</sub> CO <sub>3</sub>     | none                            | 18                         |
| 26              | <b>PC8</b> | DMF        | K <sub>2</sub> CO <sub>3</sub>     | Na <sub>2</sub> SO <sub>4</sub> | 62                         |
| <b>27</b>       | <b>PC8</b> | <b>DMF</b> | <b>K<sub>2</sub>CO<sub>3</sub></b> | <b>4 Å MS</b>                   | <b>76 (67)<sup>d</sup></b> |
| 28              | <b>PC8</b> | DMF        | none                               | 4 Å MS                          | N.D.                       |
| 29              | <b>PC8</b> | DMF        | Li <sub>2</sub> CO <sub>3</sub>    | 4 Å MS                          | 61                         |
| 30              | <b>PC8</b> | DMF        | Na <sub>2</sub> CO <sub>3</sub>    | 4 Å MS                          | 74                         |
| 31              | <b>PC8</b> | DMF        | Cs <sub>2</sub> CO <sub>3</sub>    | 4 Å MS                          | 58                         |
| 32              | <b>PC8</b> | DMF        | NaOAc                              | 4 Å MS                          | 67                         |
| 33              | <b>PC8</b> | DMF        | NaHCO <sub>3</sub>                 | 4 Å MS                          | 38                         |
| 34              | <b>PC8</b> | DMF        | K <sub>3</sub> PO <sub>4</sub>     | 4 Å MS                          | 66                         |
| 35              | <b>PC8</b> | DMF        | K <sub>2</sub> HPO <sub>4</sub>    | 4 Å MS                          | 69                         |
| 36              | <b>PC8</b> | DMF        | KH <sub>2</sub> PO <sub>4</sub>    | 4 Å MS                          | 12                         |
| 37              | <b>PC8</b> | DMF        | Na <sub>2</sub> HPO <sub>4</sub>   | 4 Å MS                          | 15                         |
| 38              | <b>PC8</b> | DMF        | NaOH                               | 4 Å MS                          | 13                         |
| 39              | <b>PC8</b> | DMF        | Et <sub>3</sub> N                  | 4 Å MS                          | 27                         |
| 40              | <b>PC8</b> | DMF        | DIPEA                              | 4 Å MS                          | 22                         |
| 41              | <b>PC8</b> | DMF        | DBU                                | 4 Å MS                          | 22                         |
| 42              | none       | DMF        | K <sub>2</sub> CO <sub>3</sub>     | 4 Å MS                          | 24                         |
| 43 <sup>e</sup> | <b>PC8</b> | DMF        | K <sub>2</sub> CO <sub>3</sub>     | 4 Å MS                          | N.D.                       |
| 44 <sup>f</sup> | <b>PC8</b> | DMF        | K <sub>2</sub> CO <sub>3</sub>     | 4 Å MS                          | N.D.                       |

<sup>a</sup>Unless otherwise specified, the reaction was conducted as follows: **1a** (0.1 mmol, 1equiv), **2a** (1.1 equiv), **PC** (1 mol %), base (1.5 equiv), additive (5 equiv of Na<sub>2</sub>SO<sub>4</sub> or 50 mg of 4 Å MS, if used), solvent (1 mL), N<sub>2</sub>, blue LEDs irradiation (10 W), rt, 24 h. <sup>b</sup>NMR yield was determined using 1,3,5-trimethoxybenzene as the internal standard. <sup>c</sup>Isolated yield. <sup>d</sup>Isolated yield on a 0.2 mmol scale of indole **1a**. <sup>e</sup>The reaction was carried out in the dark. <sup>f</sup>The reaction was conducted in the open air.

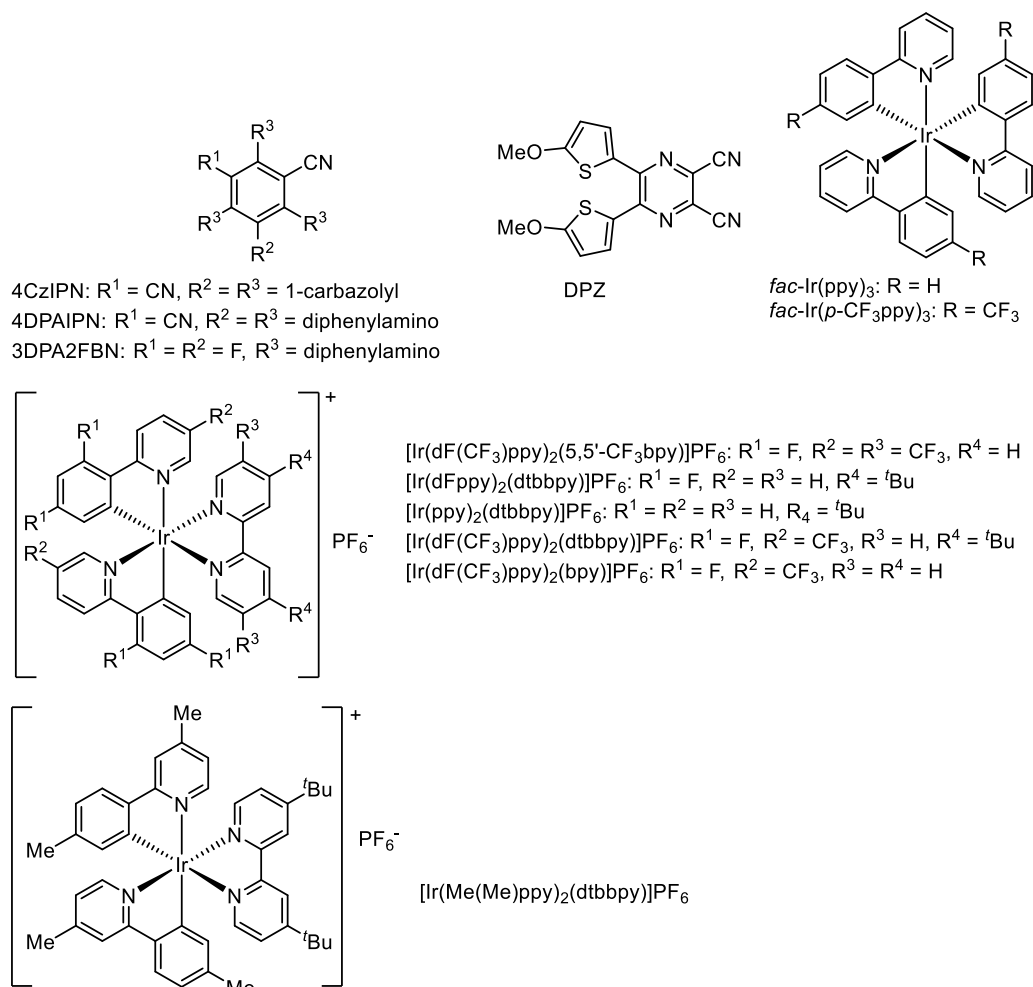

**Figure S3** The structures of photocatalysts used for optimization of reaction conditions

## General procedure for the synthesis of 3-(*o*-aminophenyl)pyrroles

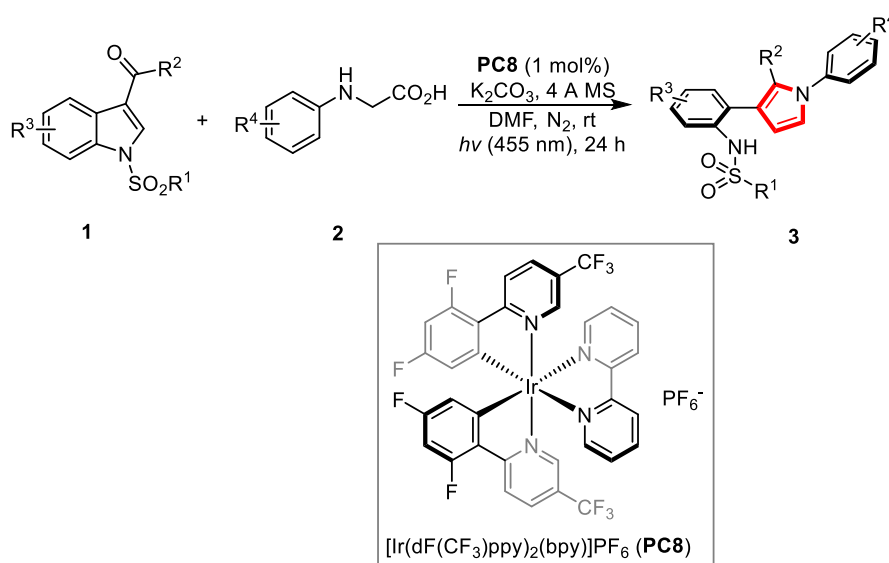

To a 15-mL transparent glass vial with magnetic stir bar were successively added *N*-sulfonyl-3-acyl indole **1** (0.20 mmol), *N*-phenylglycine **2** (0.22 mmol), K<sub>2</sub>CO<sub>3</sub> (41.4 mg, 0.30

mmol), 4 Å molecular sieve (100 mg), [Ir(dF(CF<sub>3</sub>)ppy)(bpy)]PF<sub>6</sub> (**PC8**, 2.0 mg, 2 μmol) and anhydrous DMF (2 mL). The vial was then sealed up with the open-topped cap equipped with silicone septa and placed under N<sub>2</sub> atmosphere in the photoreactor under the irradiation of blue LED (455 nm, 10 W). The reaction was stirred for 24 h cooled with a circling chiller (ethanol as the refrigerant at 25 °C). Then the mixture was filtered *in vacuo* and washed with dichloromethane (2 mL×3). Then the filtrate was concentrated *in vacuo* to give a residue, which was purified through column chromatography with petroleum/ether ethyl acetate as the eluent to give 3-(2-aminophenyl)pyrrole **3**.

## Mechanistic investigation

### Radical trapping experiment with TEMPO

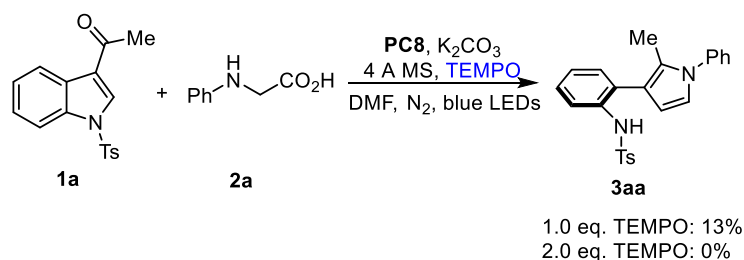

Two parallel reactions were performed. To a 15-mL transparent glass vial with magnetic stir bar were successively added *N*-sulfonyl-3-acyl indole **1a** (62.6 mg, 0.20 mmol), *N*-phenylglycine **2a** (33.3 mg, 0.22 mmol), K<sub>2</sub>CO<sub>3</sub> (41.4 mg, 0.30 mmol), 4 Å molecular sieve (100 mg), [Ir(dF(CF<sub>3</sub>)ppy)(bpy)]PF<sub>6</sub> (**PC8**, 2.0 mg, 2 μmol), TEMPO (2,2,6,6-tetramethyl-1-piperidinyloxy, 31.3 mg for 1.0 eq. and 62.5 mg for 2.0 eq.) and anhydrous DMF (2 mL) under N<sub>2</sub> atmosphere. The vial was then sealed up with the open-topped cap equipped with silicone septa and placed under N<sub>2</sub> in the photoreactor under the irradiation of blue LED (455 nm, 10 W). The reaction was stirred for 24 h cooled with a circling chiller (ethanol as the refrigerant at 25 °C). After that, internal standard 1,3,5-trimethoxybenzene (10.0 mg) was added to the reaction system and the resulting mixture was vigorously stirred for 20 min before being kept still for 20 min. A fraction of the reaction liquid (*ca.* 50 μL) was extracted and diluted with CDCl<sub>3</sub> (0.5 mL) for NMR analysis. The NMR yields of biaryl **3aa** were identified as 13% and 0% by the erosion of 1.0 and 2.0 equiv. of TEMPO, respectively.

### Light on/off experiment

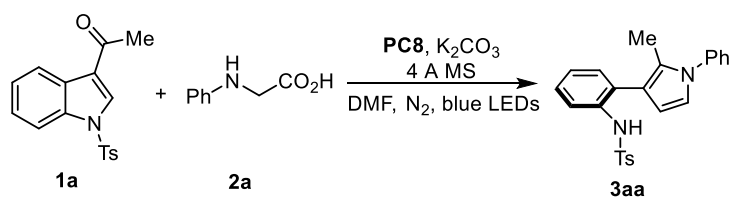

Six standard reactions were set up parallel on a 0.10 mmol scale with 1,3,5-trimethoxybenzene

(5.0 mg) as an internal standard. One of the reaction vials was unsealed for NMR analysis before the irradiation of the remained ones with blue LEDs for 2 h. Then the second parallel reaction was NMR analyzed and the remained four vials were kept in the dark for another 2 h. All the six parallel reactions were analyzed after alternant treatment with irradiation and darkness in a period of 2 h. The NMR yield of each reaction is listed as follows.

| Time (h)  | 0   | 2  | 4   | 6  | 8   | 10 |
|-----------|-----|----|-----|----|-----|----|
| On/Off    | Off | On | Off | On | Off | On |
| Yield (%) | 0   | 19 | 23  | 39 | 42  | 53 |

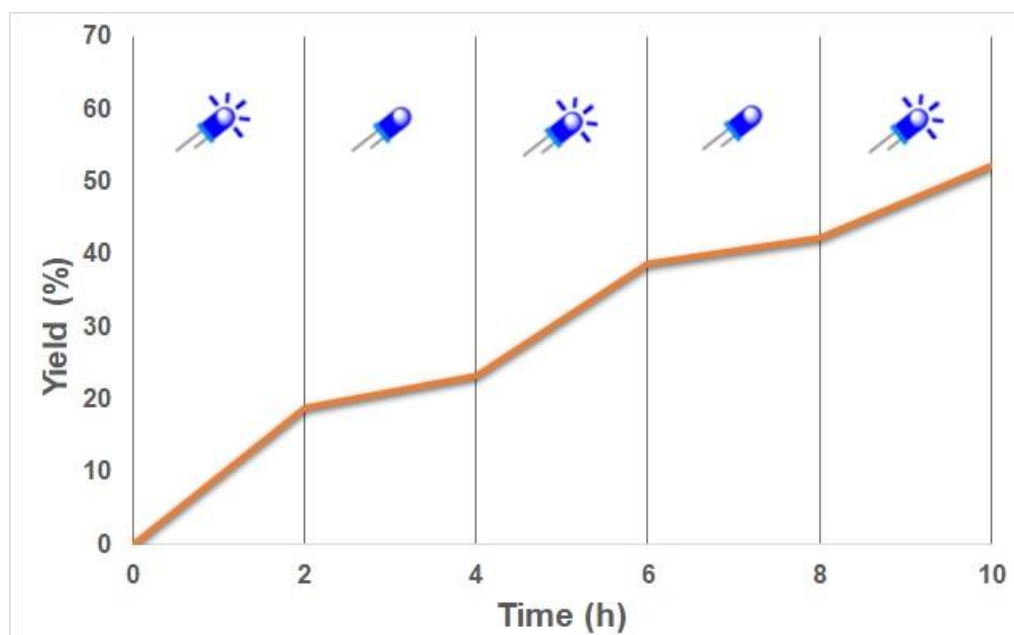

**Figure S4** The results of the light on/off experiment

### Emission Quenching Experiments (Stern–Volmer Studies)

Emission intensities were recorded using an FLS1000 Transient/Steady-state Fluorescence Spectrometer. The emission intensity was collected with the excitation wavelength at 480 nm. The fluorescence was measured from 470 nm to 800 nm. The fluorescence intensity for exploration of the relationship between  $I_0/I$  and the concentration of **1a/2a** was collected at maximum emission wavelength of 499 nm.

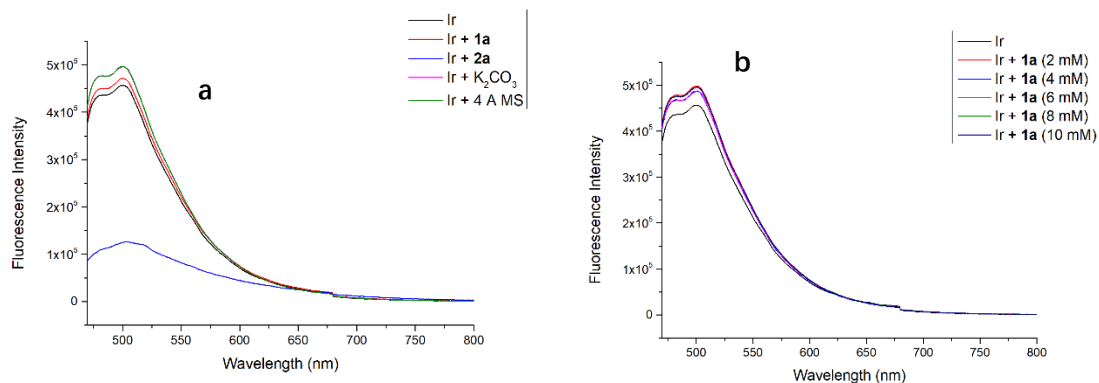



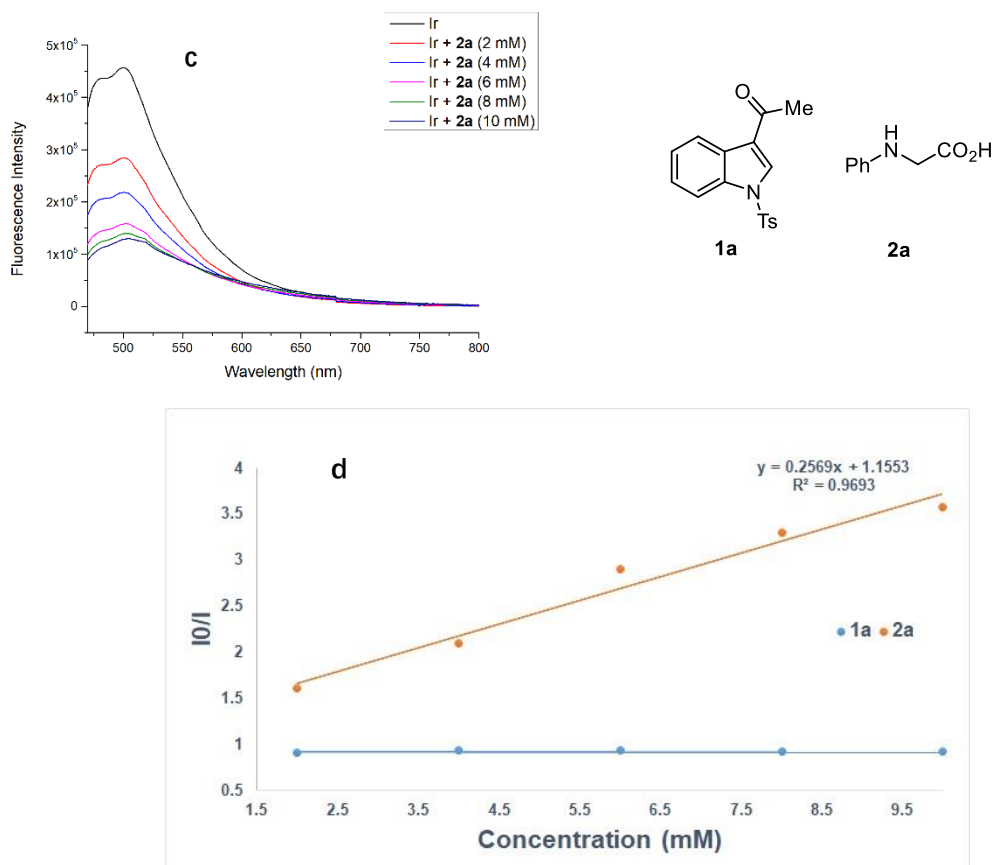

**Figure S5** Stern–Volmer studies

- a:** The emission spectra of  $5 \times 10^{-5}$  M solutions of  $[\text{Ir}(\text{dF}(\text{CF}_3)\text{ppy})_2(\text{bpy})]\text{PF}_6$  in DMF with (or without) different reaction components (blank, **1a**, **2a**,  $\text{K}_2\text{CO}_3$ ,  $4 \text{ \AA}$  molecular sieve);
- b:** The emission spectra of  $5 \times 10^{-5}$  M solutions of  $[\text{Ir}(\text{dF}(\text{CF}_3)\text{ppy})_2(\text{bpy})]\text{PF}_6$  in DMF with various concentration of **1a**;
- c:** The emission spectra of  $5 \times 10^{-5}$  M solutions of  $[\text{Ir}(\text{dF}(\text{CF}_3)\text{ppy})_2(\text{bpy})]\text{PF}_6$  in DMF with various concentration of **2a**;
- d:** The relationship between fluorescence quenching ratio ( $I_0/I$ ) and the increasing concentration of **1a/2a**.

## Characterization data of products

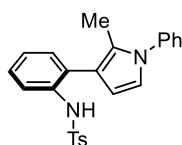

**3aa**

4-methyl-*N*-(2-(2-methyl-1-phenyl-1*H*-pyrrol-3-yl)phenyl)benzenesulfonamide (**3aa**)

54 mg (67%), yellowish powder, **M. p.** = 51–53 °C;  $^1\text{H NMR}$  (400 MHz,  $\text{CDCl}_3$ ):  $\delta$  7.67 (dd,  $J = 8.2, 1.2$  Hz, 1H), 7.61 (d,  $J = 8.3$  Hz, 2H), 7.53–7.46 (m, 2H), 7.43–7.37 (m, 1H), 7.36–7.31 (m, 2H), 7.27–7.22 (m, 1H), 7.20–7.16 (m, 2H), 7.15–7.10 (m, 2H), 7.07 (td,  $J = 7.4, 1.2$  Hz, 1H),

6.82 (d,  $J = 2.9$  Hz, 1H), 5.87 (d,  $J = 2.9$  Hz, 1H), 2.33 (s, 3H), 1.86 (s, 3H);  $^{13}\text{C}$  NMR (100 MHz,  $\text{CDCl}_3$ ):  $\delta$  143.6, 139.9, 136.5, 135.2, 131.2, 129.5, 129.2, 127.8, 127.6, 127.4, 127.2, 127.1, 125.7, 124.0, 121.9, 119.2, 117.2, 108.8, 21.5, 11.0; HRMS (ESI)  $m/z$ : calcd for  $\text{C}_{24}\text{H}_{23}\text{N}_2\text{O}_2\text{S}^+$   $[\text{M}+\text{H}]^+$ , 403.1475; found, 403.1492;

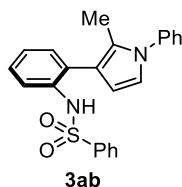

*N*-(2-(2-methyl-1-phenyl-1*H*-pyrrol-3-yl)phenyl)benzenesulfonamide (**1ab**)

53 mg (68%), yellowish oil,  $^1\text{H}$  NMR (400 MHz,  $\text{CDCl}_3$ ):  $\delta$  7.75–7.67 (m, 3H), 7.53–7.45 (m, 3H), 7.42–7.35 (m, 3H), 7.35–7.30 (m, 2H), 7.25 (td,  $J = 8.5, 1.9$  Hz, 1H), 7.16 (br s, 1H), 7.13 (dd,  $J = 7.7, 1.9$  Hz, 1H), 7.08 (td,  $J = 7.4, 1.2$  Hz, 1H), 6.81 (d,  $J = 2.9$  Hz, 1H), 5.84 (d,  $J = 2.9$  Hz, 1H), 1.83 (s, 3H);  $^{13}\text{C}$  NMR (100 MHz,  $\text{CDCl}_3$ ):  $\delta$  139.8, 139.4, 135.0, 132.8, 131.2, 129.2, 128.8, 127.8, 127.7, 127.3, 127.1, 125.7, 124.2, 121.9, 119.4, 117.1, 108.7, 11.0 (1C is merged with other peaks); HRMS (ESI)  $m/z$ : calcd for  $\text{C}_{23}\text{H}_{21}\text{N}_2\text{O}_2\text{S}^+$   $[\text{M}+\text{H}]^+$ , 389.1318; found, 389.1332;

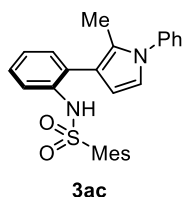

2,4,6-trimethyl-*N*-(2-(2-methyl-1-phenyl-1*H*-pyrrol-3-yl)phenyl)benzenesulfonamide (**3ac**)

61 mg (71%), offwhite powder, **M. p.** = 113–114 °C;  $^1\text{H}$  NMR (400 MHz,  $\text{CDCl}_3$ ):  $\delta$  7.54–7.46 (m, 3H), 7.43–7.38 (m, 1H), 7.36–7.32 (m, 2H), 7.31 (br s, 1H), 7.23–7.13 (m, 2H), 7.06 (td,  $J = 7.5, 1.3$  Hz, 1H), 6.86 (d,  $J = 2.9$  Hz, 1H), 6.80 (s, 2H), 6.13 (d,  $J = 2.9$  Hz, 1H), 2.42 (s, 6H), 2.19 (s, 3H), 1.84 (s, 3H);  $^{13}\text{C}$  NMR (100 MHz,  $\text{CDCl}_3$ ):  $\delta$  142.2, 139.9, 139.3, 135.2, 133.9, 131.8, 131.2, 129.3, 127.8, 127.6, 127.3, 127.0, 125.6, 124.0, 121.8, 119.6, 117.6, 109.0, 22.8, 20.8, 11.0; HRMS (ESI)  $m/z$ : calcd for  $\text{C}_{26}\text{H}_{27}\text{N}_2\text{O}_2\text{S}^+$   $[\text{M}+\text{H}]^+$ , 431.1778; found, 431.1793

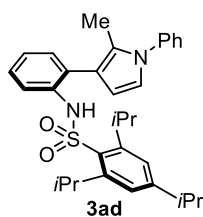

2,4,6-triisopropyl-*N*-(2-(2-methyl-1-phenyl-1*H*-pyrrol-3-yl)phenyl)benzenesulfonamide (**3ad**)

63 mg (61%), white powder, **M. p.** = 122–123 °C;  $^1\text{H}$  NMR (400 MHz,  $\text{CDCl}_3$ ):  $\delta$  7.50–7.44 (m, 2H), 7.40–7.35 (m, 1H), 7.35–7.30 (m, 2H), 7.24 (dd,  $J = 8.4, 1.3$  Hz, 1H), 7.19 (dd,  $J = 7.5, 1.6$

Hz, 1H), 7.18–7.13 (m, 3H), 7.07 (br s, 1H), 7.05 (td,  $J = 7.4, 1.3$  Hz, 1H), 6.84 (d,  $J = 2.9$  Hz, 1H), 6.17 (d,  $J = 2.9$  Hz, 1H), 4.12 (sept,  $J = 6.8$  Hz, 2H), 2.89 (sept,  $J = 6.8$  Hz, 1H), 2.01 (s, 3H), 1.24 (d,  $J = 6.8$  Hz, 6H), 1.17 (d,  $J = 6.8$  Hz, 12H);  $^{13}\text{C}$  NMR (100 MHz,  $\text{CDCl}_3$ ):  $\delta$  152.9, 150.3, 139.9, 135.8, 133.5, 131.4, 129.2, 127.42, 127.40, 127.2, 127.0, 125.7, 123.9, 123.5, 121.7, 118.9, 117.6, 109.2, 34.1, 29.8, 24.7, 23.5, 11.3; HRMS (ESI)  $m/z$ : calcd for  $\text{C}_{32}\text{H}_{39}\text{N}_2\text{O}_2\text{S}^+$   $[\text{M}+\text{H}]^+$ , 515.2727; found, 515.2744;

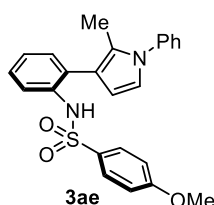

4-methoxy-*N*-(2-(2-methyl-1-phenyl-1*H*-pyrrol-3-yl)phenyl)benzenesulfonamide (**3ae**)

52 mg (62%), brown oil,  $^1\text{H}$  NMR (400 MHz,  $\text{CDCl}_3$ ):  $\delta$  7.71–7.61 (m, 3H), 7.52–7.45 (m, 2H), 7.42–7.36 (m, 1H), 7.36–7.32 (m, 2H), 7.24 (td,  $J = 7.2, 1.8$  Hz, 1H), 7.17–7.11 (m, 2H), 7.07 (td,  $J = 7.4, 1.2$  Hz, 1H), 6.86–6.80 (m, 3H), 5.89 (d,  $J = 2.9$  Hz, 1H), 3.75 (s, 3H), 1.86 (s, 3H);  $^{13}\text{C}$  NMR (100 MHz,  $\text{CDCl}_3$ ):  $\delta$  162.9, 139.8, 135.2, 131.2, 131.0, 129.24, 129.21, 127.7, 127.6, 127.3, 127.1, 125.7, 124.0, 121.8, 119.3, 117.2, 114.0, 108.7, 55.4, 11.0; HRMS (ESI)  $m/z$ : calcd for  $\text{C}_{24}\text{H}_{23}\text{N}_2\text{O}_3\text{S}^+$   $[\text{M}+\text{H}]^+$ , 419.1424; found, 419.1458;

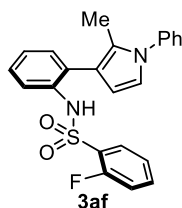

2-fluoro-*N*-(2-(2-methyl-1-phenyl-1*H*-pyrrol-3-yl)phenyl)benzenesulfonamide (**3af**)

44 mg (54%), yellowish powder, **M. p.** = 130–131 °C;  $^1\text{H}$  NMR (400 MHz,  $\text{CDCl}_3$ ):  $\delta$  7.88 (td,  $J = 7.5, 1.8$  Hz, 1H), 7.56 (d,  $J = 8.2$  Hz, 1H), 7.53–7.44 (m, 4H), 7.43–7.35 (m, 3H), 7.23–7.14 (m, 3H), 7.09–6.98 (m, 2H), 6.87 (d,  $J = 2.9$  Hz, 1H), 6.11 (d,  $J = 2.9$  Hz, 1H), 1.91 (s, 3H);  $^{13}\text{C}$  NMR (100 MHz,  $\text{CDCl}_3$ ):  $\delta$  158.9 (d,  $J = 256.4$  Hz), 140.0, 135.2 (d,  $J = 8.4$  Hz), 134.7, 131.3, 130.9, 129.2, 127.7, 127.5, 127.4, 127.2 (d,  $J = 13.4$  Hz), 127.0, 125.8, 124.2 (d,  $J = 3.8$  Hz), 124.0, 122.0, 118.5, 117.0 (d,  $J = 2.2$  Hz), 116.8, 108.8, 11.0;  $^{19}\text{F}$  NMR (376 MHz,  $\text{CDCl}_3$ ):  $\delta$  -109.4 (m, 1F); HRMS (ESI)  $m/z$ : calcd for  $\text{C}_{23}\text{H}_{20}\text{FN}_2\text{O}_2\text{S}^+$   $[\text{M}+\text{H}]^+$ , 407.1224; found, 407.1224;

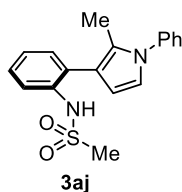

*N*-(2-(2-methyl-1-phenyl-1*H*-pyrrol-3-yl)phenyl)methanesulfonamide (**3aj**)

39 mg (59%), yellow oil,  $^1\text{H NMR}$  (400 MHz,  $\text{CDCl}_3$ ):  $\delta$  7.65 (dd,  $J = 8.2, 1.2$  Hz, 1H), 7.53–7.46 (m, 2H), 7.43–7.39 (m, 1H), 7.39–7.32 (m, 3H), 7.31–7.28 (m, 1H), 7.16 (td,  $J = 7.5, 1.2$  Hz, 1H), 6.93 (br s, 1H), 6.89 (d,  $J = 2.9$  Hz, 1H), 6.20 (d,  $J = 2.9$  Hz, 1H), 2.96 (s, 3H), 2.08 (s, 3H);  $^{13}\text{C NMR}$  (100 MHz,  $\text{CDCl}_3$ ):  $\delta$  139.8, 135.5, 131.7, 129.2, 128.2, 127.4, 127.2, 127.0, 125.8, 124.0, 122.2, 118.0, 117.3, 108.9, 39.3, 11.3; **HRMS** (ESI)  $m/z$ : calcd for  $\text{C}_{18}\text{H}_{19}\text{N}_2\text{O}_2\text{S}^+$   $[\text{M}+\text{H}]^+$ , 327.1162; found, 327.1159;

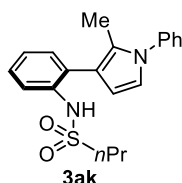

*N*-(2-(2-methyl-1-phenyl-1*H*-pyrrol-3-yl)phenyl)propane-1-sulfonamide (**3ak**)

34 mg (48%), brown oil,  $^1\text{H NMR}$  (400 MHz,  $\text{CDCl}_3$ ):  $\delta$  7.65 (dd,  $J = 8.2, 1.2$  Hz, 1H), 7.53–7.45 (m, 2H), 7.43–7.34 (m, 3H), 7.34–7.24 (m, 2H), 7.15 (td,  $J = 7.5, 1.2$  Hz, 1H), 6.90 (br s, 1H), 6.89 (d,  $J = 2.9$  Hz, 1H), 6.21 (d,  $J = 2.9$  Hz, 1H), 3.08–2.99 (m, 2H), 2.08 (s, 3H), 1.79–1.68 (m, 2H), 0.97 (t,  $J = 7.5$  Hz, 3H);  $^{13}\text{C NMR}$  (100 MHz,  $\text{CDCl}_3$ ):  $\delta$  139.8, 135.6, 131.6, 129.2, 128.1, 127.4, 127.0, 126.8, 125.8, 123.7, 122.2, 117.8, 117.3, 108.8, 53.2, 17.0, 12.8, 11.2; **HRMS** (ESI)  $m/z$ : calcd for  $\text{C}_{20}\text{H}_{23}\text{N}_2\text{O}_2\text{S}^+$   $[\text{M}+\text{H}]^+$ , 355.1475; found, 355.1484;

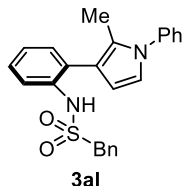

*N*-(2-(2-methyl-1-phenyl-1*H*-pyrrol-3-yl)phenyl)-1-phenylmethanesulfonamide (**3al**)

43 mg (54%), yellowish powder, **M. p.** = 50–52 °C;  $^1\text{H NMR}$  (400 MHz,  $\text{CDCl}_3$ ):  $\delta$  7.65 (dd,  $J = 8.2, 1.2$  Hz, 1H), 7.49–7.43 (m, 2H), 7.40–7.35 (m, 1H), 7.34–7.25 (m, 7H), 7.22–7.18 (m, 2H), 7.14 (td,  $J = 7.4, 1.2$  Hz, 1H), 6.84 (br s, 1H), 6.77 (d,  $J = 2.9$  Hz, 1H), 5.93 (d,  $J = 2.9$  Hz, 1H), 4.39 (s, 2H), 2.04 (s, 3H);  $^{13}\text{C NMR}$  (100 MHz,  $\text{CDCl}_3$ ):  $\delta$  139.8, 135.6, 131.7, 130.6, 129.2, 128.8, 128.5, 128.0, 127.3, 127.0, 126.0, 125.8, 123.3, 122.0, 117.0, 116.3, 108.6, 57.2, 11.3 (1C is merged with other peaks); **HRMS** (ESI)  $m/z$ : calcd for  $\text{C}_{24}\text{H}_{23}\text{N}_2\text{O}_2\text{S}^+$   $[\text{M}+\text{H}]^+$ , 403.1475; found, 403.1494;

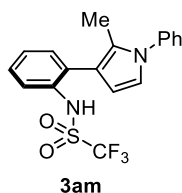

1,1,1-trifluoro-*N*-(2-(2-methyl-1-phenyl-1*H*-pyrrol-3-yl)phenyl)methanesulfonamide (**3am**)

36 mg (47%), yellowish oil,  $^1\text{H NMR}$  (400 MHz,  $\text{CDCl}_3$ ):  $\delta$  7.65 (dd,  $J = 8.2, 1.2$  Hz, 1H),

7.53–7.46 (m, 2H), 7.44–7.38 (m, 1H), 7.38–7.29 (m, 4H), 7.28–7.21 (m, 2H), 6.90 (d,  $J = 2.9$  Hz, 1H), 6.22 (d,  $J = 2.9$  Hz, 1H), 2.07 (s, 3H);  $^{13}\text{C NMR}$  (100 MHz,  $\text{CDCl}_3$ ):  $\delta$  139.8, 133.2, 131.6, 129.3, 128.3, 128.1, 127.6, 127.5, 125.9, 125.5, 122.4, 119.7 (q,  $J = 323.0$  Hz), 119.1, 116.5, 108.6, 11.1;  $^{19}\text{F NMR}$  (376 MHz,  $\text{CDCl}_3$ ):  $\delta$  -75.9 (s, 3F); **HRMS** (ESI)  $m/z$ : calcd for  $\text{C}_{18}\text{H}_{16}\text{F}_3\text{N}_2\text{O}_2\text{S}^+ [\text{M}+\text{H}]^+$ , 381.0879; found, 381.0880;

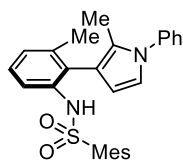

**3ap**

2,4,6-trimethyl-*N*-(3-methyl-2-(2-methyl-1-phenyl-1*H*-pyrrol-3-yl)phenyl)benzenesulfonamide

**(3ap)**

33 mg (37%), yellow powder, **M. p.** = 129–131 °C;  $^1\text{H NMR}$  (400 MHz,  $\text{CDCl}_3$ ):  $\delta$  7.53–7.47 (m, 2H), 7.43–7.37 (m, 1H), 7.36–7.31 (m, 3H), 7.14–7.06 (m, 2H), 6.96 (dt,  $J = 7.6, 1.1$  Hz, 1H), 6.89 (d,  $J = 2.8$  Hz, 1H), 6.82 (s, 2H), 5.97 (d,  $J = 2.9$  Hz, 1H), 2.45 (s, 6H), 2.21 (s, 3H), 2.07 (s, 3H), 1.72 (s, 3H);  $^{13}\text{C NMR}$  (100 MHz,  $\text{CDCl}_3$ ):  $\delta$  142.1, 140.0, 139.3, 138.9, 135.9, 134.2, 131.9, 129.2, 127.4, 127.2, 127.1, 126.7, 125.5, 125.3, 122.0, 116.1, 115.7, 109.2, 22.9, 20.8, 20.5, 10.9; **HRMS** (ESI)  $m/z$ : calcd for  $\text{C}_{27}\text{H}_{29}\text{N}_2\text{O}_2\text{S}^+ [\text{M}+\text{H}]^+$ , 445.1944; found, 445.1952;

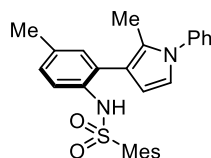

**3aq**

2,4,6-trimethyl-*N*-(4-methyl-2-(2-methyl-1-phenyl-1*H*-pyrrol-3-yl)phenyl)benzenesulfonamide

**(3aq)**

53 mg (59%), brown foam,  $^1\text{H NMR}$  (400 MHz,  $\text{CDCl}_3$ ):  $\delta$  7.54–7.46 (m, 2H), 7.43–7.37 (m, 2H), 7.35–7.30 (m, 2H), 7.19 (br s, 1H), 7.01 (dd,  $J = 8.3, 2.2$  Hz, 1H), 6.96 (d,  $J = 2.1$  Hz, 1H), 6.84 (d,  $J = 2.9$  Hz, 1H), 6.79 (s, 2H), 6.08 (d,  $J = 2.9$  Hz, 1H), 2.39 (s, 6H), 2.27 (s, 3H), 2.18 (s, 3H), 1.81 (s, 3H);  $^{13}\text{C NMR}$  (100 MHz,  $\text{CDCl}_3$ ):  $\delta$  142.0, 139.9, 139.3, 134.0, 133.7, 132.5, 131.8, 131.7, 129.2, 128.2, 128.1, 127.3, 126.9, 125.6, 121.7, 120.2, 117.8, 109.0, 22.8, 20.8, 20.7, 10.9; **HRMS** (ESI)  $m/z$ : calcd for  $\text{C}_{27}\text{H}_{29}\text{N}_2\text{O}_2\text{S}^+ [\text{M}+\text{H}]^+$ , 445.1944; found, 445.1962;

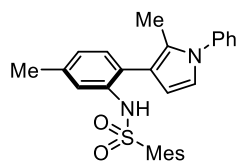

**3ar**

2,4,6-trimethyl-*N*-(5-methyl-2-(2-methyl-1-phenyl-1*H*-pyrrol-3-yl)phenyl)benzenesulfonamide

**(3ar)**

66 mg (74%), brown powder, **M. p.** = 148–149 °C; **<sup>1</sup>H NMR** (400 MHz, CDCl<sub>3</sub>): δ 7.54–7.45 (m, 2H), 7.44–7.37 (m, 1H), 7.36–7.30 (m, 3H), 7.27 (br s, 1H), 7.03 (d, *J* = 7.7 Hz, 1H), 6.88 (dd, *J* = 7.8, 1.8 Hz, 1H), 6.85 (d, *J* = 2.9 Hz, 1H), 6.80 (s, 2H), 6.11 (d, *J* = 2.9 Hz, 1H), 2.42 (s, 6H), 2.30 (s, 3H), 2.19 (s, 3H), 1.83 (s, 3H); **<sup>13</sup>C NMR** (100 MHz, CDCl<sub>3</sub>): δ 142.1, 139.9, 139.3, 137.4, 134.9, 133.9, 131.8, 130.9, 129.2, 127.3, 127.0, 125.6, 124.78, 124.75, 121.7, 120.1, 117.5, 109.1, 22.7, 21.3, 20.8, 10.9; **HRMS** (ESI) *m/z*: calcd for C<sub>27</sub>H<sub>29</sub>N<sub>2</sub>O<sub>2</sub>S<sup>+</sup> [M+H]<sup>+</sup>, 445.1944; found, 445.1964;

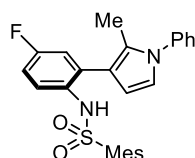**3as**

*N*-(4-fluoro-2-(2-methyl-1-phenyl-1*H*-pyrrol-3-yl)phenyl)-2,4,6-trimethylbenzenesulfonamide

**(3as)**

64 mg (71%), yellowish foam, **<sup>1</sup>H NMR** (400 MHz, CDCl<sub>3</sub>): δ 7.55–7.47 (m, 3H), 7.45–7.39 (m, 1H), 7.35–7.29 (m, 2H), 7.21 (br s, 1H), 6.92 (ddd, *J* = 9.0, 8.0, 3.0 Hz, 1H), 6.88–6.83 (m, 2H), 6.78 (s, 2H), 6.08 (d, *J* = 2.9 Hz, 1H), 2.36 (s, 6H), 2.18 (s, 3H), 1.78 (s, 3H); **<sup>13</sup>C NMR** (100 MHz, CDCl<sub>3</sub>): δ 159.4 (d, *J* = 244.2 Hz), 142.2, 139.7, 139.3, 133.7, 131.8, 131.0 (d, *J* = 2.8 Hz), 130.7 (d, *J* = 8.5 Hz), 129.3, 127.5, 127.1, 125.6, 122.6 (d, *J* = 8.6 Hz), 122.0, 117.6 (d, *J* = 22.1 Hz), 116.9, 114.1 (d, *J* = 22.3 Hz), 108.6, 22.8, 20.8, 10.8; **<sup>19</sup>F NMR** (376 MHz, CDCl<sub>3</sub>): δ -118.2 (m, 1F); **HRMS** (ESI) *m/z*: calcd for C<sub>26</sub>H<sub>26</sub>FN<sub>2</sub>O<sub>2</sub>S<sup>+</sup> [M+H]<sup>+</sup>, 449.1694; found, 449.1714;

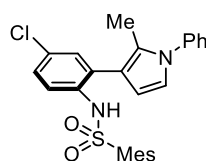**3at**

*N*-(4-chloro-2-(2-methyl-1-phenyl-1*H*-pyrrol-3-yl)phenyl)-2,4,6-trimethylbenzenesulfonamide

**(3at)**

57 mg (61%), yellow powder, **M. p.** = 136–137 °C; **<sup>1</sup>H NMR** (400 MHz, CDCl<sub>3</sub>): δ 7.54–7.48 (m, 2H), 7.47–7.39 (m, 2H), 7.35–7.30 (m, 2H), 7.27 (br s, 1H), 7.19–7.12 (m, 2H), 6.86 (d, *J* = 2.9 Hz, 1H), 6.81 (s, 2H), 6.10 (d, *J* = 2.9 Hz, 1H), 2.40 (s, 6H), 2.20 (s, 3H), 1.83 (s, 3H); **<sup>13</sup>C NMR** (100 MHz, CDCl<sub>3</sub>): δ 142.4, 139.7, 139.2, 133.8, 133.6, 131.9, 130.9, 129.7, 129.3, 129.2, 127.5, 127.4, 127.2, 125.7, 122.1, 120.9, 116.5, 108.8, 22.8, 20.8, 10.9; **HRMS** (ESI) *m/z*: calcd for C<sub>26</sub>H<sub>26</sub>ClN<sub>2</sub>O<sub>2</sub>S<sup>+</sup> [M+H]<sup>+</sup>, 465.1398; found, 465.1400;

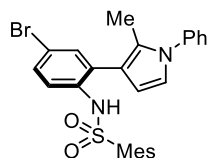

**3au**

*N*-(4-bromo-2-(2-methyl-1-phenyl-1*H*-pyrrol-3-yl)phenyl)-2,4,6-trimethylbenzenesulfonamide  
(**3au**)

54 mg (53%), brown powder, **M. p.** = 157–158 °C; **<sup>1</sup>H NMR** (400 MHz, CDCl<sub>3</sub>): δ 7.54–7.47 (m, 2H), 7.45–7.39 (m, 1H), 7.39–7.35 (m, 1H), 7.34–7.29 (m, 3H), 7.29 (s, 1H), 7.26 (br s, 1H), 6.86 (d, *J* = 2.9 Hz, 1H), 6.82 (s, 2H), 6.10 (d, *J* = 2.9 Hz, 1H), 2.41 (s, 6H), 2.20 (s, 3H), 1.85 (s, 3H); **<sup>13</sup>C NMR** (100 MHz, CDCl<sub>3</sub>): δ 142.5, 139.7, 139.2, 134.4, 133.8, 133.6, 132.0, 130.4, 129.9, 129.3, 127.5, 127.3, 125.7, 122.1, 121.0, 116.8, 116.4, 108.8, 22.8, 20.8, 11.0; **HRMS** (ESI) *m/z*: calcd for C<sub>26</sub>H<sub>26</sub>BrN<sub>2</sub>O<sub>2</sub>S<sup>+</sup> [M+H]<sup>+</sup>, 509.0893; found, 509.0921;

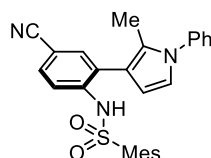

**3av**

*N*-(4-cyano-2-(2-methyl-1-phenyl-1*H*-pyrrol-3-yl)phenyl)-2,4,6-trimethylbenzenesulfonamide  
(**3av**)

69 mg (76%), brown powder, **M. p.** = 177–178 °C; **<sup>1</sup>H NMR** (400 MHz, CDCl<sub>3</sub>): δ 7.55 (br s, 1H), 7.54–7.49 (m, 2H), 7.48–7.40 (m, 4H), 7.37–7.31 (m, 2H), 6.91 (d, *J* = 2.9 Hz, 1H), 6.89 (s, 2H), 6.17 (d, *J* = 2.9 Hz, 1H), 2.50 (s, 6H), 2.24 (s, 3H), 1.94 (s, 3H); **<sup>13</sup>C NMR** (100 MHz, CDCl<sub>3</sub>): δ 143.1, 139.7, 139.5, 139.2, 134.9, 133.2, 132.2, 131.6, 129.4, 127.7, 127.60, 127.55, 125.8, 122.6, 118.8, 117.6, 115.1, 108.6, 106.6, 22.7, 20.9, 11.0; **HRMS** (ESI) *m/z*: calcd for C<sub>27</sub>H<sub>26</sub>N<sub>3</sub>O<sub>2</sub>S<sup>+</sup> [M+H]<sup>+</sup>, 456.1740; found, 456.1747;

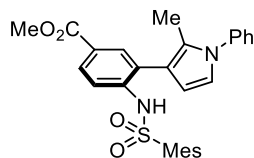

**3aw**

methyl 3-(2-methyl-1-phenyl-1*H*-pyrrol-3-yl)-4-((2,4,6-trimethylphenyl)sulfonamido)benzoate  
(**3aw**)

67 mg (68%), brown powder, **M. p.** = 144–145 °C; **<sup>1</sup>H NMR** (400 MHz, CDCl<sub>3</sub>): δ 7.89–7.82 (m, 2H), 7.55–7.48 (m, 3H), 7.46–7.39 (m, 2H), 7.37–7.33 (m, 2H), 6.90 (d, *J* = 2.9 Hz, 1H), 6.85 (s, 2H), 6.17 (d, *J* = 2.9 Hz, 1H), 3.85 (s, 3H), 2.49 (s, 6H), 2.22 (3H), 1.93 (s, 3H); **<sup>13</sup>C NMR** (100 MHz, CDCl<sub>3</sub>): δ 166.6, 142.7, 139.7, 139.6, 139.2, 133.4, 132.7, 132.1, 129.3, 129.2, 127.5, 127.4,

126.6, 125.7, 125.0, 122.2, 117.1, 116.4, 108.9, 51.9, 22.7, 20.9, 11.0; **HRMS** (ESI)  $m/z$ : calcd for  $C_{28}H_{29}N_2O_4S^+$   $[M+H]^+$ , 489.1843; found, 489.1861;

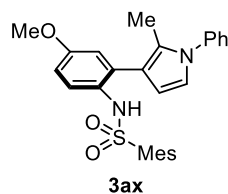

*N*-(4-methoxy-2-(2-methyl-1-phenyl-1*H*-pyrrol-3-yl)phenyl)-2,4,6-trimethylbenzenesulfonamide (**3ax**)

70 mg (76%), yellowish crystal, **M. p.** = 127–128 °C; **<sup>1</sup>H NMR** (400 MHz,  $CDCl_3$ ):  $\delta$  7.55–7.47 (m, 3H), 7.43–7.37 (m, 1H), 7.34–7.29 (m, 2H), 7.11 (br s, 1H), 6.83 (d,  $J$  = 2.9 Hz, 1H), 6.78 (dd,  $J$  = 8.9, 3.0 Hz, 1H), 6.74 (s, 2H), 6.68 (d,  $J$  = 3.0 Hz, 1H), 6.05 (d,  $J$  = 2.9 Hz, 1H), 3.75 (s, 3H), 2.32 (s, 6H), 2.15 (s, 3H), 1.74 (s, 3H); **<sup>13</sup>C NMR** (100 MHz,  $CDCl_3$ ):  $\delta$  156.5, 141.9, 139.8, 139.3, 133.9, 131.7, 130.6, 129.3, 127.9, 127.3, 126.9, 125.5, 123.3, 121.7, 118.0, 116.2, 112.7, 108.8, 55.4, 22.9, 20.8, 10.9; **HRMS** (ESI)  $m/z$ : calcd for  $C_{27}H_{29}N_2O_3S^+$   $[M+H]^+$ , 461.1893; found, 461.1905;

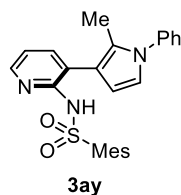

2,4,6-trimethyl-*N*-(3-(2-methyl-1-phenyl-1*H*-pyrrol-3-yl)pyridin-2-yl)benzenesulfonamide (**3ay**)

75 mg (87%), brown oil, **<sup>1</sup>H NMR** (400 MHz,  $CDCl_3$ ):  $\delta$  8.02 (br s, 1H), 7.64 (br s, 1H), 7.53–7.46 (m, 2H), 7.45–7.39 (m, 2H), 7.39–7.35 (m, 2H), 6.93 (s, 2H), 6.88 (d,  $J$  = 3.0 Hz, 1H), 6.87–6.83 (m, 1H), 6.26 (d,  $J$  = 2.9 Hz, 1H), 2.75 (s, 6H), 2.72 (s, 3H), 2.09 (s, 3H); **<sup>13</sup>C NMR** (100 MHz,  $CDCl_3$ ):  $\delta$  150.1, 146.1, 142.2, 140.0, 139.7, 139.0, 134.3, 131.6, 129.2, 127.5, 127.4, 125.8, 122.2, 119.2, 117.7, 115.9, 108.6, 22.8, 20.9, 11.3; **HRMS** (ESI)  $m/z$ : calcd for  $C_{25}H_{26}N_3O_2S^+$   $[M+H]^+$ , 432.1740; found, 432.1747;

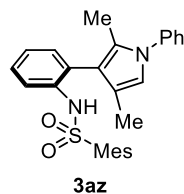

*N*-(2-(2,4-dimethyl-1-phenyl-1*H*-pyrrol-3-yl)phenyl)-2,4,6-trimethylbenzenesulfonamide (**3az**)

16 mg (18%), light red powder, **M. p.** = 61–63 °C; **<sup>1</sup>H NMR** (400 MHz,  $CDCl_3$ ):  $\delta$  7.55 (dd,  $J$  = 8.2, 1.2 Hz, 1H), 7.51–7.45 (m, 2H), 7.40–7.35 (m, 1H), 7.34–7.29 (m, 2H), 7.22 (ddd,  $J$  = 8.2, 7.1, 1.9 Hz, 1H), 7.14–7.03 (m, 3H), 6.80 (s, 2H), 6.68 (d,  $J$  = 1.1 Hz, 1H), 2.41 (s, 6H), 2.19 (s, 3H), 1.82 (s, 3H), 1.76 (d,  $J$  = 1.1 Hz, 3H); **<sup>13</sup>C NMR** (100 MHz,  $CDCl_3$ ):  $\delta$  142.2, 140.0, 139.2,



135.6, 134.0, 131.9, 131.8, 129.2, 127.8, 127.0, 126.7, 126.6, 125.5, 123.9, 119.8, 119.0, 118.2, 118.0, 22.7, 20.8, 11.2, 10.2; **HRMS** (ESI)  $m/z$ : calcd for  $C_{27}H_{29}N_2O_2S^+$   $[M+H]^+$ , 445.1944; found, 445.1969;

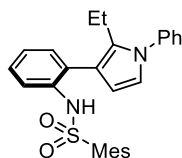

**3aA**

*N*-(2-(2-ethyl-1-phenyl-1*H*-pyrrol-3-yl)phenyl)-2,4,6-trimethylbenzenesulfonamide (**3aA**)

44 mg (49%), brown powder, **M. p.** = 141–143 °C; **<sup>1</sup>H NMR** (400 MHz,  $CDCl_3$ ):  $\delta$  7.53–7.47 (m, 2H), 7.45–7.35 (m, 4H), 7.28 (br s, 1H), 7.22–7.15 (m, 2H), 7.04 (td,  $J = 7.4, 1.3$  Hz, 1H), 6.87 (s, 2H), 6.81 (d,  $J = 2.9$  Hz, 1H), 6.06 (d,  $J = 2.9$  Hz, 1H), 2.50 (s, 6H), 2.37 (q,  $J = 7.5$  Hz, 2H), 2.25 (s, 3H), 0.70 (t,  $J = 7.5$  Hz, 3H); **<sup>13</sup>C NMR** (100 MHz,  $CDCl_3$ ):  $\delta$  142.3, 140.2, 139.3, 135.5, 134.1, 133.3, 132.0, 131.4, 129.3, 127.68, 127.65, 127.3, 126.2, 123.5, 122.4, 118.4, 116.8, 109.1, 22.9, 20.9, 17.9, 14.5; **HRMS** (ESI)  $m/z$ : calcd for  $C_{27}H_{29}N_2O_2S^+$   $[M+H]^+$ , 445.1944; found, 445.1949;

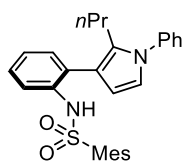

**3aB**

2,4,6-trimethyl-*N*-(2-(1-phenyl-2-propyl-1*H*-pyrrol-3-yl)phenyl)benzenesulfonamide (**3aB**)

20 mg (22%), brown foam, **<sup>1</sup>H NMR** (400 MHz,  $CDCl_3$ ):  $\delta$  7.53–7.47 (m, 2H), 7.45–7.33 (m, 4H), 7.26 (br s, 1H), 7.21–7.15 (m, 2H), 7.04 (td,  $J = 8.0, 1.2$  Hz, 1H), 6.87 (s, 2H), 6.81 (d,  $J = 2.9$  Hz, 1H), 6.05 (d,  $J = 2.9$  Hz, 1H), 2.50 (s, 6H), 2.32 (t,  $J = 8.0$  Hz, 2H), 2.25 (s, 3H), 1.12–1.00 (m, 2H), 0.55 (t,  $J = 7.3$  Hz, 3H); **<sup>13</sup>C NMR** (100 MHz,  $CDCl_3$ ):  $\delta$  142.3, 140.2, 139.3, 135.4, 134.1, 132.0, 131.8, 131.4, 129.3, 127.63, 127.59, 127.3, 126.1, 123.5, 122.5, 118.3, 117.3, 109.1, 26.6, 22.9, 20.9, 13.7 (1C is merged with other peaks); **HRMS** (ESI)  $m/z$ : calcd for  $C_{28}H_{31}N_2O_2S^+$   $[M+H]^+$ , 459.2101; found, 459.2100;

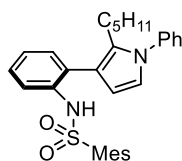

**3aC**

2,4,6-trimethyl-*N*-(2-(2-pentyl-1-phenyl-1*H*-pyrrol-3-yl)phenyl)benzenesulfonamide (**3aC**)

28 mg (29%), yellowish oil,  $^1\text{H NMR}$  (400 MHz,  $\text{CDCl}_3$ ):  $\delta$  7.53–7.46 (m, 2H), 7.45–7.39 (m, 2H), 7.38–7.33 (m, 2H), 7.27 (br s, 1H), 7.21–7.15 (m, 2H), 7.03 (td,  $J = 7.4, 1.2$  Hz, 1H), 6.87 (s, 2H), 6.80 (d,  $J = 2.9$  Hz, 1H), 6.05 (d,  $J = 2.9$  Hz, 1H), 2.49 (s, 6H), 2.31 (t,  $J = 8.0$  Hz, 2H), 2.24 (s, 3H), 1.09–1.00 (m, 2H), 1.00–0.86 (m, 4H), 0.64 (t,  $J = 7.0$  Hz, 3H);  $^{13}\text{C NMR}$  (100 MHz,  $\text{CDCl}_3$ ):  $\delta$  142.2, 140.2, 139.3, 135.4, 134.2, 132.0, 131.3, 129.2, 127.6, 127.4, 126.1, 123.5, 122.4, 118.4, 117.2, 109.1, 31.2, 29.1, 24.4, 22.9, 21.8, 20.9, 13.7 (2C are merged with other peaks); **HRMS** (ESI)  $m/z$ : calcd for  $\text{C}_{30}\text{H}_{35}\text{N}_2\text{O}_2\text{S}^+$   $[\text{M}+\text{H}]^+$ , 487.2414; found, 487.2404;

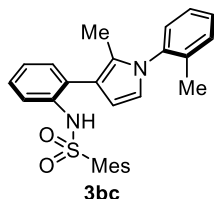

2,4,6-trimethyl-*N*-(2-(2-methyl-1-(*o*-tolyl)-1*H*-pyrrol-3-yl)phenyl)benzenesulfonamide (**3bc**)  
59 mg (66%), yellowish foam,  $^1\text{H NMR}$  (400 MHz,  $\text{CDCl}_3$ ):  $\delta$  7.42–7.29 (m, 5H), 7.27–7.23 (m, 1H), 7.19–7.12 (m, 2H), 7.02 (td,  $J = 7.4, 1.2$  Hz, 1H), 6.85 (s, 2H), 6.71 (d,  $J = 2.8$  Hz, 1H), 6.16 (d,  $J = 2.8$  Hz, 1H), 2.50 (s, 6H), 2.22 (s, 3H), 2.08 (s, 3H), 1.76 (s, 3H);  $^{13}\text{C NMR}$  (100 MHz,  $\text{CDCl}_3$ ):  $\delta$  142.3, 139.3, 138.9, 135.9, 135.3, 133.8, 131.9, 131.3, 130.9, 128.6, 127.9, 127.6, 127.5, 127.1, 126.6, 123.4, 121.7, 117.9, 116.3, 108.6, 22.8, 20.9, 17.2, 10.3; **HRMS** (ESI)  $m/z$ : calcd for  $\text{C}_{27}\text{H}_{29}\text{N}_2\text{O}_2\text{S}^+$   $[\text{M}+\text{H}]^+$ , 445.1944; found, 445.1969

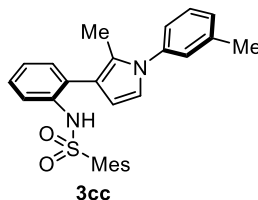

2,4,6-trimethyl-*N*-(2-(2-methyl-1-(*m*-tolyl)-1*H*-pyrrol-3-yl)phenyl)benzenesulfonamide (**3cc**)  
55 mg (62%), yellowish powder, **M. p.** = 144–145 °C;  $^1\text{H NMR}$  (400 MHz,  $\text{CDCl}_3$ ):  $\delta$  7.48 (dd,  $J = 8.2, 1.2$  Hz, 1H), 7.37 (t,  $J = 7.6$  Hz, 1H), 7.31 (br s, 1H), 7.24–7.11 (m, 5H), 7.06 (td,  $J = 7.4, 1.3$  Hz, 1H), 6.85 (d,  $J = 2.9$  Hz, 1H), 6.81 (s, 2H), 6.11 (d,  $J = 2.9$  Hz, 1H), 2.45 (s, 3H), 2.42 (s, 6H), 2.20 (s, 3H), 1.83 (s, 3H);  $^{13}\text{C NMR}$  (100 MHz,  $\text{CDCl}_3$ ):  $\delta$  142.1, 139.9, 139.3, 135.2, 134.0, 131.8, 131.2, 129.0, 128.1, 127.9, 127.5, 127.0, 126.3, 124.0, 122.7, 121.8, 119.6, 117.4, 108.8, 22.8, 21.4, 20.8, 10.9 (1C is merged with other peaks); **HRMS** (ESI)  $m/z$ : calcd for  $\text{C}_{27}\text{H}_{29}\text{N}_2\text{O}_2\text{S}^+$   $[\text{M}+\text{H}]^+$ , 445.1944; found, 445.1966

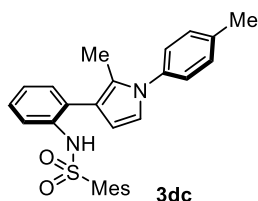

2,4,6-trimethyl-*N*-(2-(2-methyl-1-(*p*-tolyl)-1*H*-pyrrol-3-yl)phenyl)benzenesulfonamide (**3dc**)

50 mg (56%), yellowish oil,  $^1\text{H NMR}$  (400 MHz,  $\text{CDCl}_3$ ):  $\delta$  7.48 (dd,  $J = 8.1, 1.2$  Hz, 1H), 7.34–7.27 (m, 3H), 7.23–7.13 (m, 4H), 7.05 (td,  $J = 7.5, 1.3$  Hz, 1H), 6.83 (d,  $J = 2.9$  Hz, 1H), 6.80 (s, 2H) 6.11 (d,  $J = 2.9$  Hz, 1H), 2.44 (s, 3H), 2.42 (s, 6H), 2.19 (s, 3H), 1.82 (s, 3H);  $^{13}\text{C NMR}$  (100 MHz,  $\text{CDCl}_3$ ):  $\delta$  142.1, 139.3, 137.4, 137.3, 135.2, 133.9, 131.8, 131.2, 129.8, 127.9, 127.5, 127.1, 125.5, 124.0, 121.9, 119.6, 117.3, 108.7, 22.8, 21.0, 20.8, 10.9; **HRMS** (ESI)  $m/z$ : calcd for  $\text{C}_{27}\text{H}_{29}\text{N}_2\text{O}_2\text{S}^+$   $[\text{M}+\text{H}]^+$ , 445.1944; found, 445.1964;

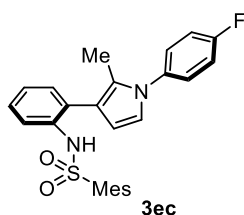

*N*-(2-(1-(4-fluorophenyl)-2-methyl-1*H*-pyrrol-3-yl)phenyl)-2,4,6-trimethylbenzenesulfonamide  
(**3ec**)

45 mg (50%), yellowish crystal, **M. p.** = 137–139 °C;  $^1\text{H NMR}$  (400 MHz,  $\text{CDCl}_3$ ):  $\delta$  7.44 (dd,  $J = 8.1, 1.2$  Hz, 1H), 7.34–7.28 (m, 2H), 7.25 (br s, 1H), 7.22–7.16 (m, 3H), 7.14 (dd,  $J = 7.6, 1.7$  Hz, 1H), 7.06 (td,  $J = 7.4, 1.2$  Hz, 1H), 6.84–6.79 (m, 3H), 6.13 (d,  $J = 2.9$  Hz, 1H), 2.44 (s, 6H), 2.21 (s, 3H), 1.83 (s, 3H);  $^{13}\text{C NMR}$  (100 MHz,  $\text{CDCl}_3$ ):  $\delta$  161.7 (d,  $J = 247.5$  Hz), 142.2, 139.3, 136.0 (d,  $J = 3.2$  Hz), 135.2, 134.0, 131.9, 131.2, 127.64, 127.60, 127.4 (d,  $J = 8.6$  Hz), 127.2, 123.9, 121.9, 119.4, 117.6, 116.2 (d,  $J = 22.7$  Hz), 109.1, 22.8, 20.8, 10.8;  $^{19}\text{F NMR}$  (376 MHz,  $\text{CDCl}_3$ ):  $\delta$  -114.0 (s, 1F); **HRMS** (ESI)  $m/z$ : calcd for  $\text{C}_{26}\text{H}_{26}\text{FN}_2\text{O}_2\text{S}^+$   $[\text{M}+\text{H}]^+$ , 449.1694; found, 449.1719;

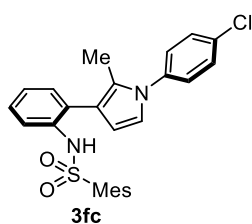

*N*-(2-(1-(4-chlorophenyl)-2-methyl-1*H*-pyrrol-3-yl)phenyl)-2,4,6-trimethylbenzenesulfonamide  
(**3fc**)

68 mg (73%), white powder, **M. p.** = 129–130 °C;  $^1\text{H NMR}$  (400 MHz,  $\text{CDCl}_3$ ):  $\delta$  7.50–7.45 (m, 2H), 7.44 (dd,  $J = 8.1, 1.2$  Hz, 1H), 7.31–7.26 (m, 2H), 7.23 (br s, 1H), 7.19 (td,  $J = 7.8, 1.8$  Hz, 1H), 7.13 (dd,  $J = 7.6, 1.7$  Hz, 1H), 7.06 (td,  $J = 7.4, 1.2$  Hz, 1H), 6.83 (d,  $J = 2.9$  Hz, 1H), 6.81 (s, 2H), 6.14 (d,  $J = 2.9$  Hz, 1H), 2.43 (s, 6H), 2.20 (s, 3H), 1.84 (s, 3H);  $^{13}\text{C NMR}$  (100 MHz,  $\text{CDCl}_3$ ):  $\delta$  142.2, 139.2, 138.4, 135.2, 133.9, 133.1, 131.9, 131.2, 129.4, 127.7, 127.5, 127.0, 126.8, 124.0, 121.7, 119.5, 118.0, 109.4, 22.8, 20.8, 10.9; **HRMS** (ESI)  $m/z$ : calcd for  $\text{C}_{26}\text{H}_{26}\text{ClN}_2\text{O}_2\text{S}^+$   $[\text{M}+\text{H}]^+$ , 465.1398; found, 465.1405;

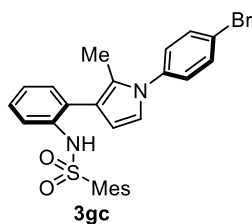

*N*-(2-(1-(4-bromophenyl)-2-methyl-1*H*-pyrrol-3-yl)phenyl)-2,4,6-trimethylbenzenesulfonamide (**3gc**)

58 mg (57%), offwhite powder, **M. p.** = 147–148 °C; **<sup>1</sup>H NMR** (400 MHz, CDCl<sub>3</sub>): δ 7.65–7.60 (m, 2H), 7.44 (dd, *J* = 8.1, 1.2 Hz, 1H), 7.25–7.16 (m, 4H), 7.13 (dd, *J* = 7.6, 1.7 Hz, 1H), 7.06 (td, *J* = 7.4, 1.3 Hz, 1H), 6.83 (d, *J* = 2.9 Hz, 1H), 6.81 (s, 2H), 6.14 (d, *J* = 2.9 Hz, 1H), 2.43 (s, 6H), 2.20 (s, 3H), 1.84 (s, 3H); **<sup>13</sup>C NMR** (100 MHz, CDCl<sub>3</sub>): δ 142.2, 139.2, 138.9, 135.2, 133.9, 132.4, 131.9, 131.2, 127.7, 127.5, 127.1, 126.9, 124.0, 121.6, 121.0, 119.5, 118.0, 109.5, 22.7, 20.8, 10.9; **HRMS** (ESI) *m/z*: calcd for C<sub>26</sub>H<sub>26</sub>BrN<sub>2</sub>O<sub>2</sub>S<sup>+</sup> [M+H]<sup>+</sup>, 509.0893; found, 509.0897;

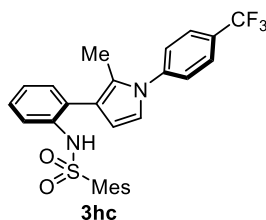

2,4,6-trimethyl-*N*-(2-(2-methyl-1-(4-(trifluoromethyl)phenyl)-1*H*-pyrrol-3-yl)phenyl)benzenesulfonamide (**3hc**)

21 mg (21%), yellowish powder, **M. p.** = 175–176 °C; **<sup>1</sup>H NMR** (400 MHz, CDCl<sub>3</sub>): δ 7.82–7.73 (m, 2H), 7.51–7.45 (m, 2H), 7.42 (dd, *J* = 8.2, 1.2 Hz, 1H), 7.23–7.17 (m, 2H), 7.15 (dd, 7.5, 1.7 Hz, 1H), 7.07 (td, *J* = 7.4, 1.2 Hz, 1H), 6.89 (d, *J* = 3.0 Hz, 1H), 6.82 (s, 2H), 6.19 (d, *J* = 2.9 Hz, 1H), 2.44 (s, 6H), 2.21 (s, 3H), 1.90 (s, 3H); **<sup>13</sup>C NMR** (100 MHz, CDCl<sub>3</sub>): δ 142.8, 142.3, 139.3, 135.2, 134.0, 131.9, 131.2, 129.3 (q, *J* = 32.7 Hz), 127.8, 127.3, 127.0, 126.6 (q, *J* = 3.6 Hz), 125.6, 124.0, 123.8 (q, *J* = 272.2 Hz), 121.6, 119.5, 118.7, 110.1, 22.8, 20.8, 11.1; **<sup>19</sup>F NMR** (376 MHz, CDCl<sub>3</sub>): δ -62.2 (s, 3F); **HRMS** (ESI) *m/z*: calcd for C<sub>27</sub>H<sub>26</sub>F<sub>3</sub>N<sub>2</sub>O<sub>2</sub>S<sup>+</sup> [M+H]<sup>+</sup>, 499.1662; found, 499.1667

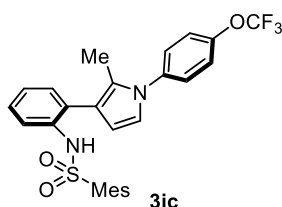

2,4,6-trimethyl-*N*-(2-(2-methyl-1-(4-(trifluoromethoxy)phenyl)-1*H*-pyrrol-3-yl)phenyl)benzenesulfonamide (**3ic**)

58 mg (56%), yellow foam, **<sup>1</sup>H NMR** (400 MHz, CDCl<sub>3</sub>): δ 7.43 (dd, *J* = 8.1, 1.2 Hz, 1H),

7.41–7.33 (m, 4H), 7.23–7.17 (m, 2H), 7.14 (dd,  $J = 7.6, 1.7$  Hz, 1H), 7.06 (td,  $J = 7.4, 1.2$  Hz, 1H), 6.85 (d,  $J = 2.9$  Hz, 1H), 6.82 (s, 2H), 6.15 (d,  $J = 2.9$  Hz, 1H), 2.44 (s, 6H), 2.21 (s, 3H), 1.86 (s, 3H);  $^{13}\text{C NMR}$  (100 MHz,  $\text{CDCl}_3$ ):  $\delta$  148.0, 142.3, 139.3, 138.4, 135.2, 134.0, 131.9, 131.2, 127.7, 127.4, 127.1, 127.0, 124.0, 121.83, 121.8, 120.4 (q,  $J = 257.8$  Hz), 119.5, 118.1, 109.6, 22.8, 20.8, 11.0;  $^{19}\text{F NMR}$  (376 MHz,  $\text{CDCl}_3$ ):  $\delta$  -57.8 (s, 3F); **HRMS** (ESI)  $m/z$ : calcd for  $\text{C}_{27}\text{H}_{26}\text{F}_3\text{N}_2\text{O}_3\text{S}^+$   $[\text{M}+\text{H}]^+$ , 515.1611; found, 515.1630;

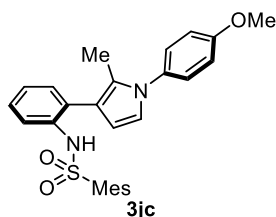

*N*-(2-(1-(4-methoxyphenyl)-2-methyl-1*H*-pyrrol-3-yl)phenyl)-2,4,6-trimethylbenzenesulfonamide (**3jc**)

60 mg (65%), yellowish foam,  $^1\text{H NMR}$  (400 MHz,  $\text{CDCl}_3$ ):  $\delta$  7.47 (dd,  $J = 8.2, 1.2$  Hz, 1H), 7.33 (br s, 1H), 7.27–7.23 (m, 2H), 7.21–7.16 (m, 1H), 7.14 (dd,  $J = 7.6, 1.7$  Hz, 1H), 7.05 (td,  $J = 7.4, 1.3$  Hz, 1H), 7.03–6.98 (m, 2H), 6.81 (d,  $J = 2.9$  Hz, 1H), 6.80 (s, 2H), 6.10 (d,  $J = 2.9$  Hz, 1H), 3.88 (s, 3H), 2.42 (s, 6H), 2.20 (s, 3H), 1.80 (s, 3H);  $^{13}\text{C NMR}$  (100 MHz,  $\text{CDCl}_3$ ):  $\delta$  158.8, 142.1, 139.3, 135.1, 133.9, 132.9, 131.8, 131.2, 127.9, 127.5, 127.3, 127.0, 123.9, 122.0, 119.5, 117.0, 114.3, 108.5, 55.5, 22.8, 20.8, 10.8; **HRMS** (ESI)  $m/z$ : calcd for  $\text{C}_{27}\text{H}_{29}\text{N}_2\text{O}_3\text{S}^+$   $[\text{M}+\text{H}]^+$ , 461.1893; found, 461.1906;

## Copies of NMR spectra of unknown substrates and products

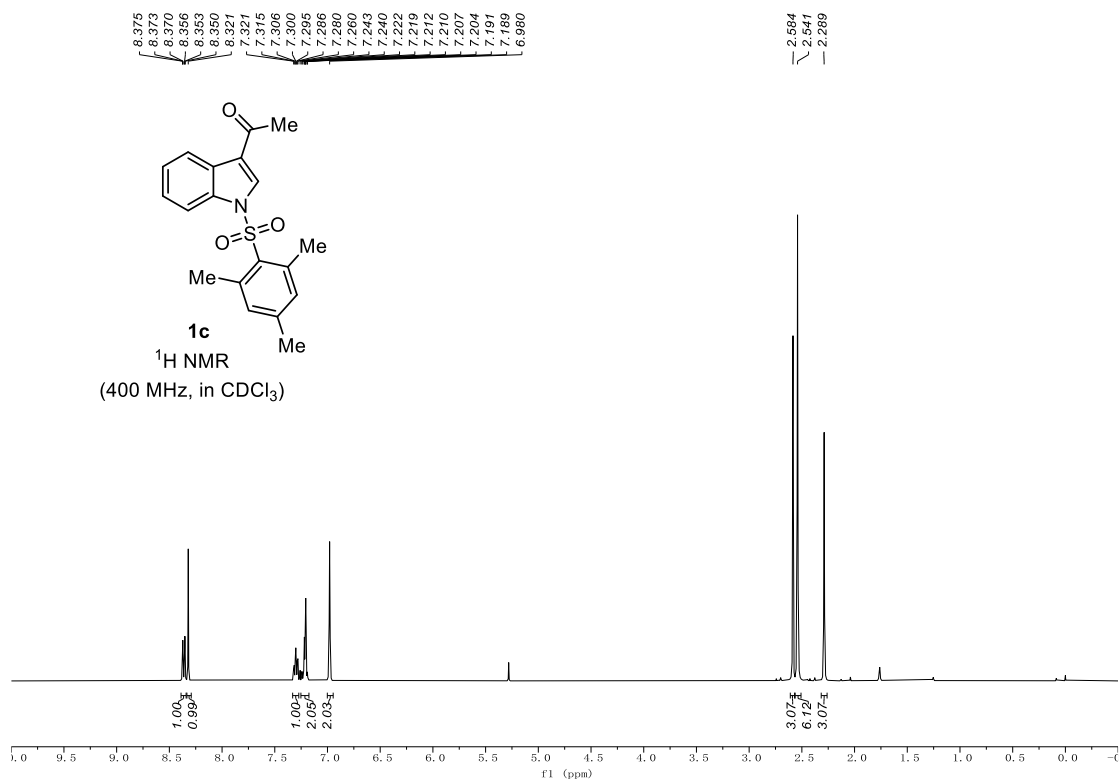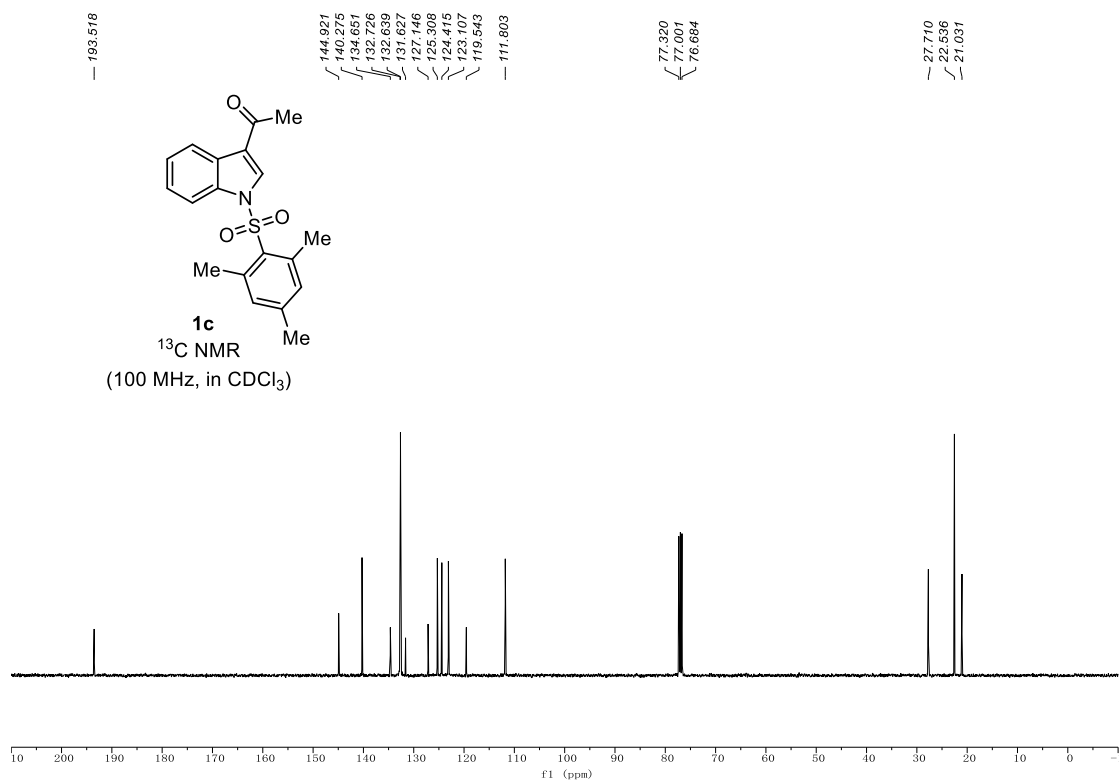



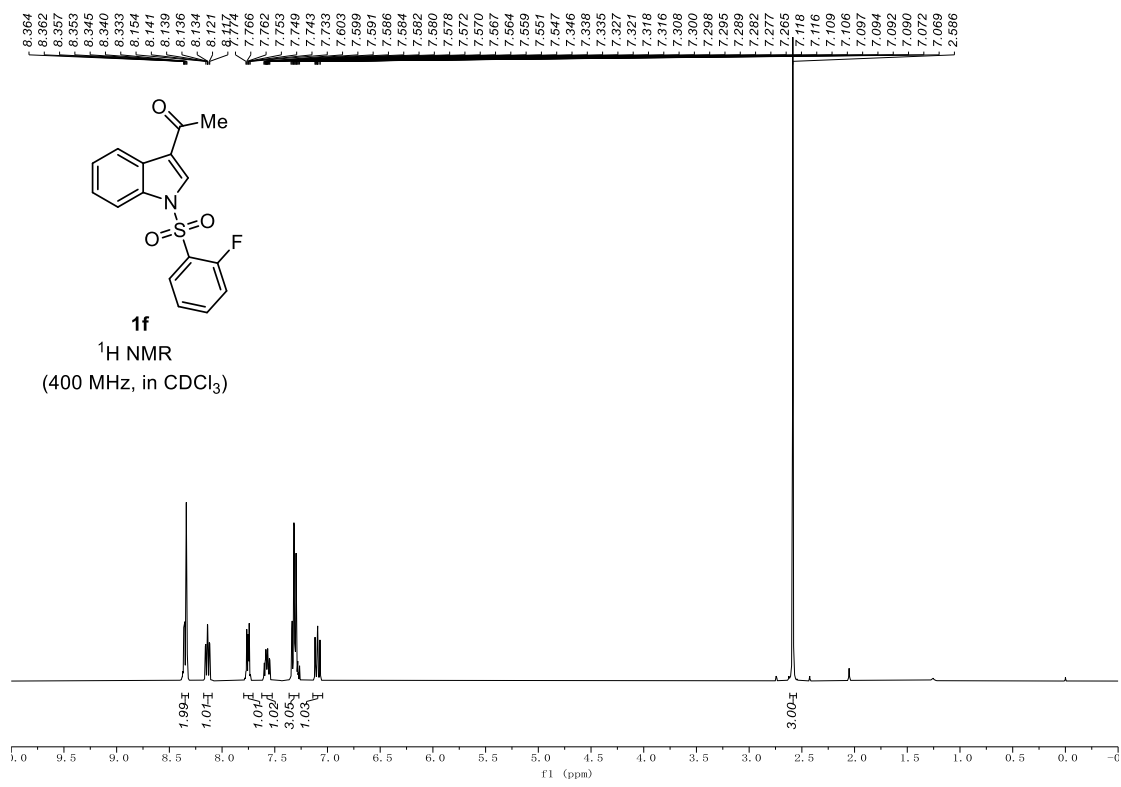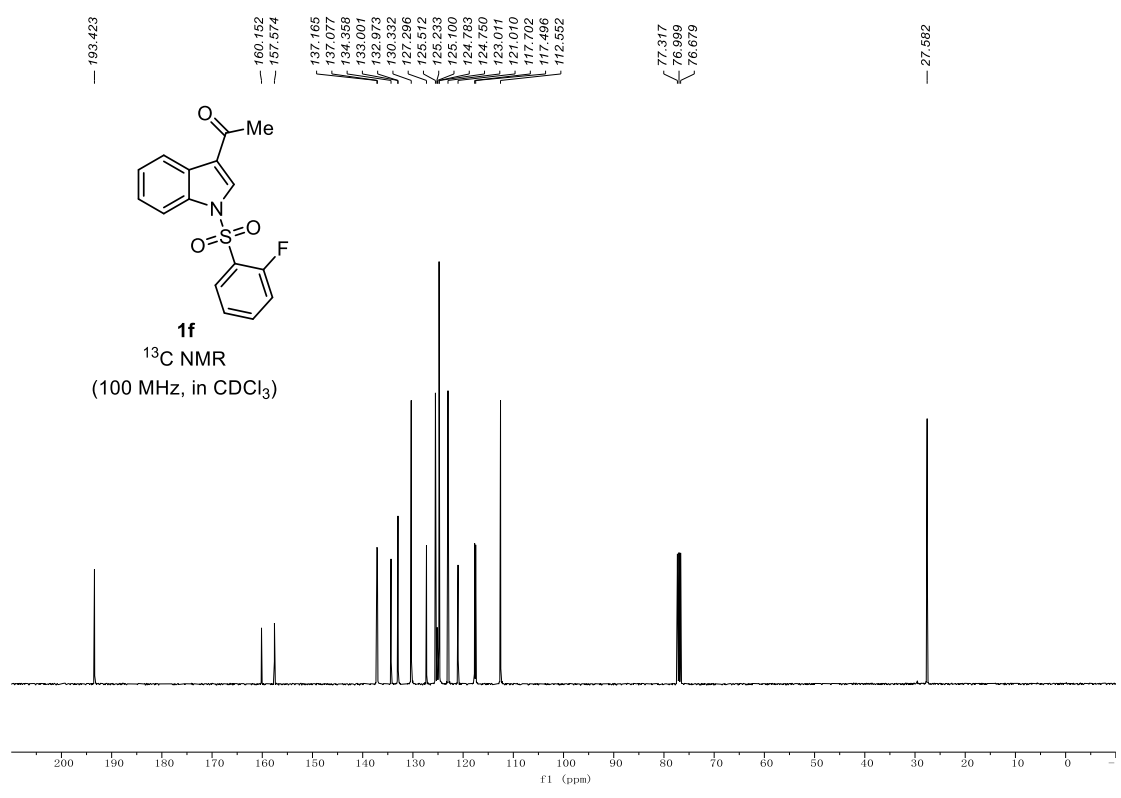



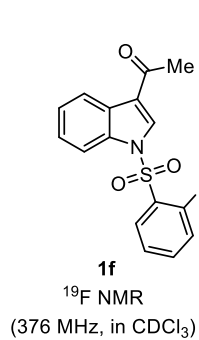

-107.342  
 -107.362  
 -107.374  
 -107.387  
 -107.406

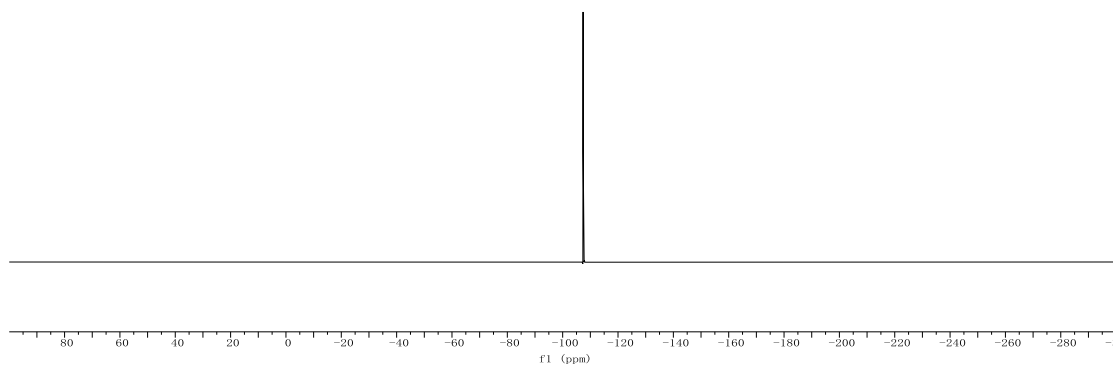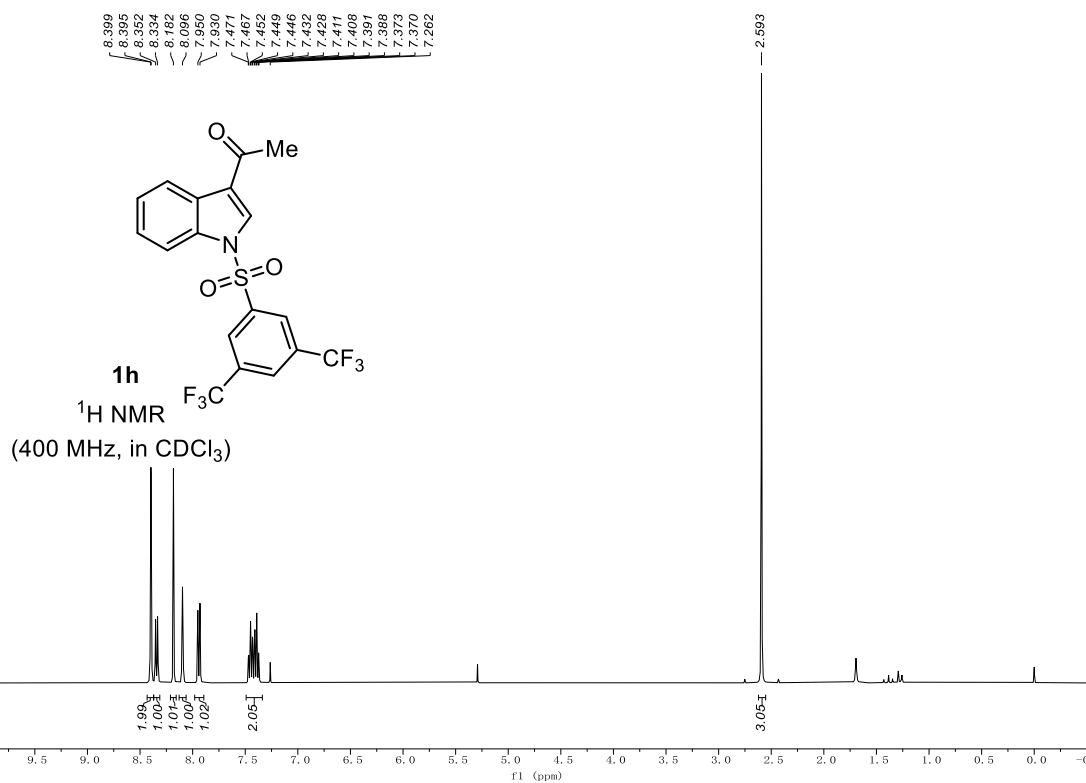

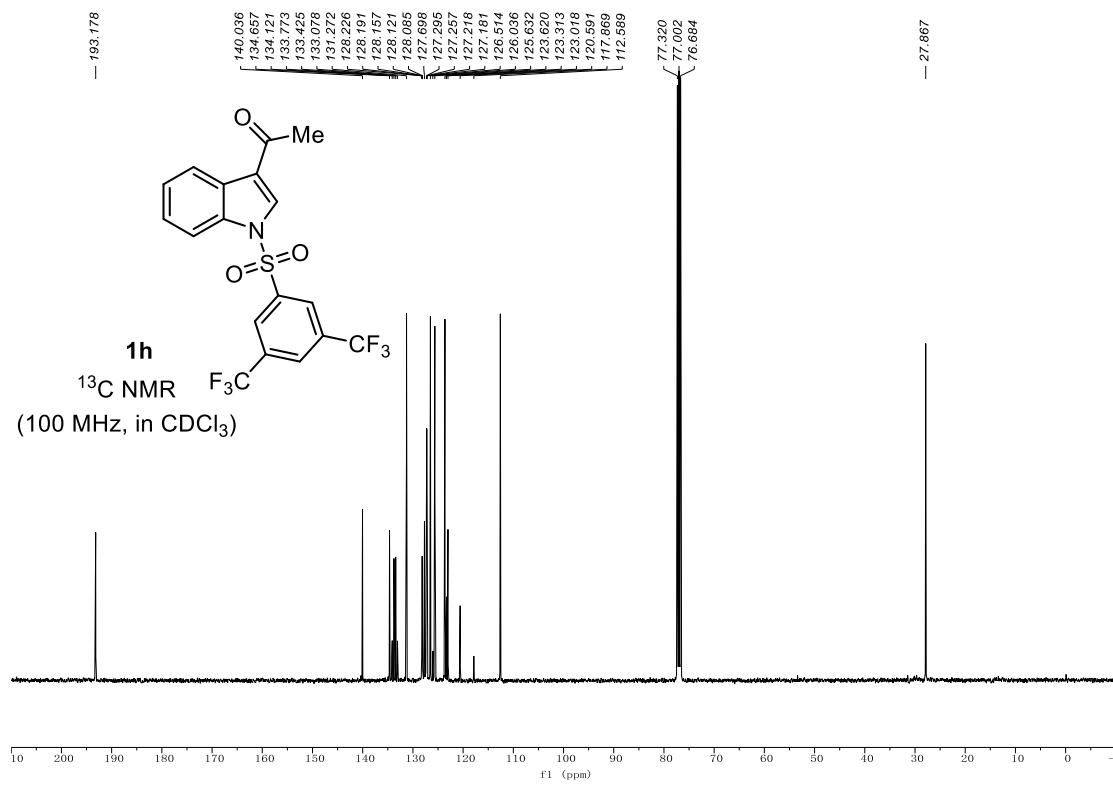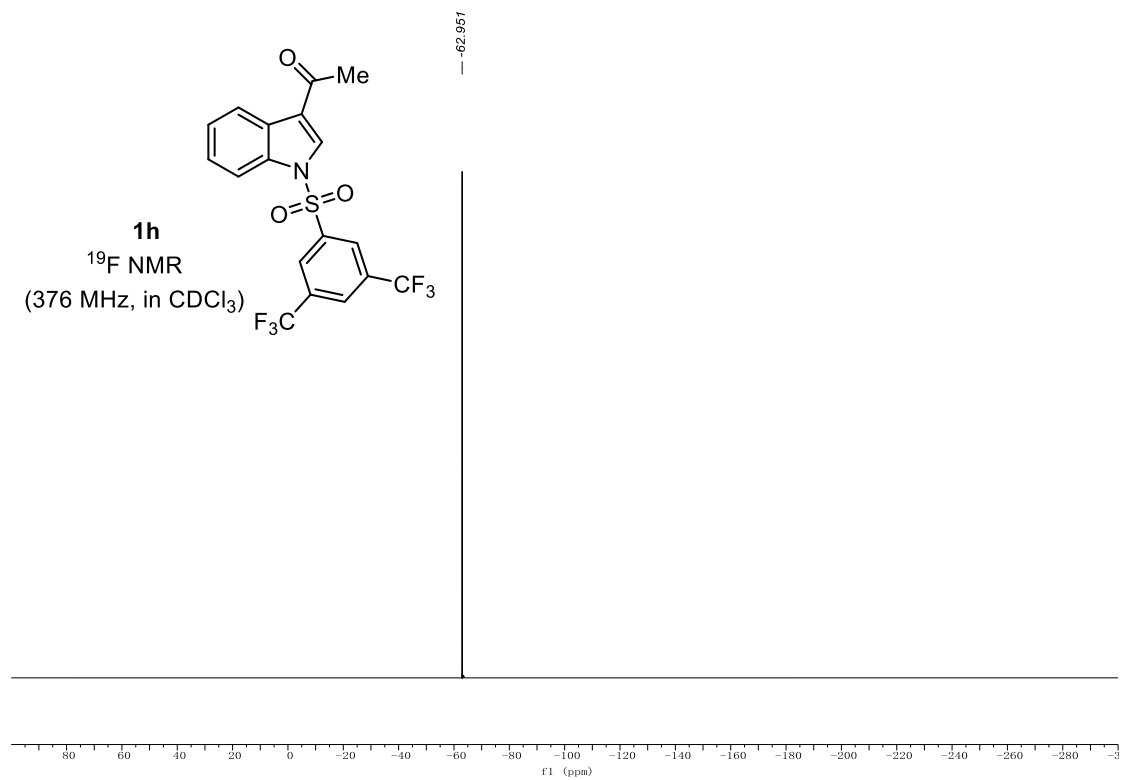

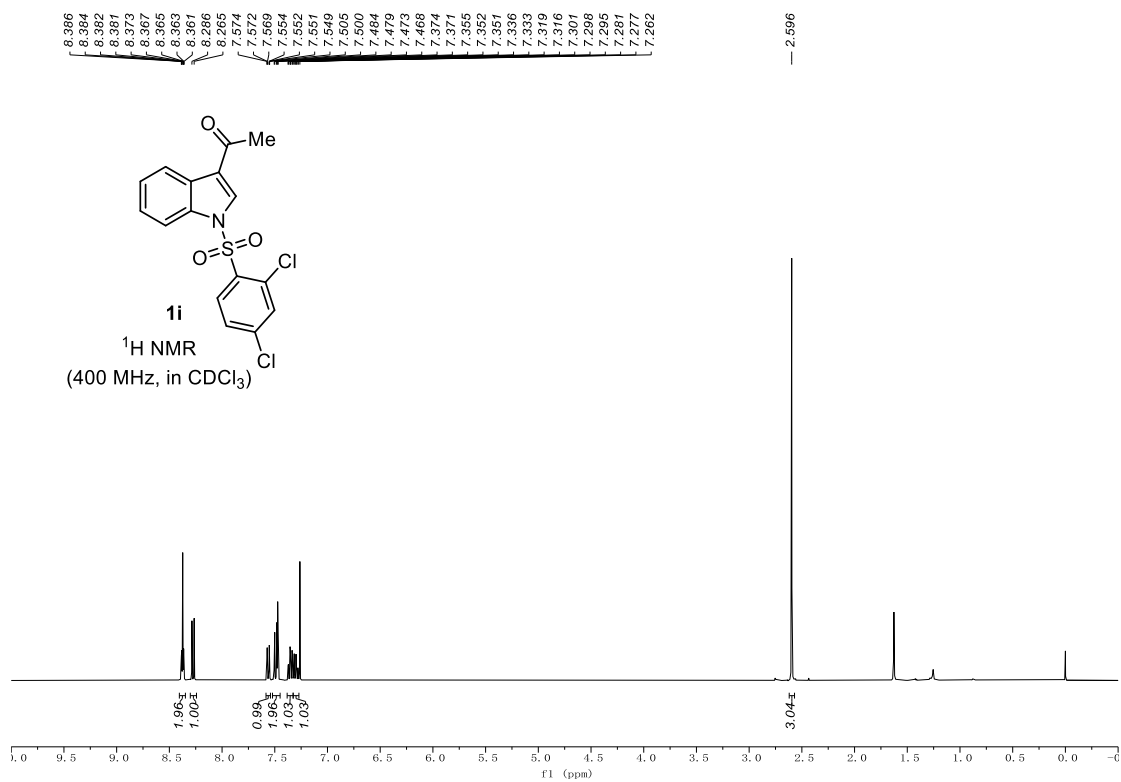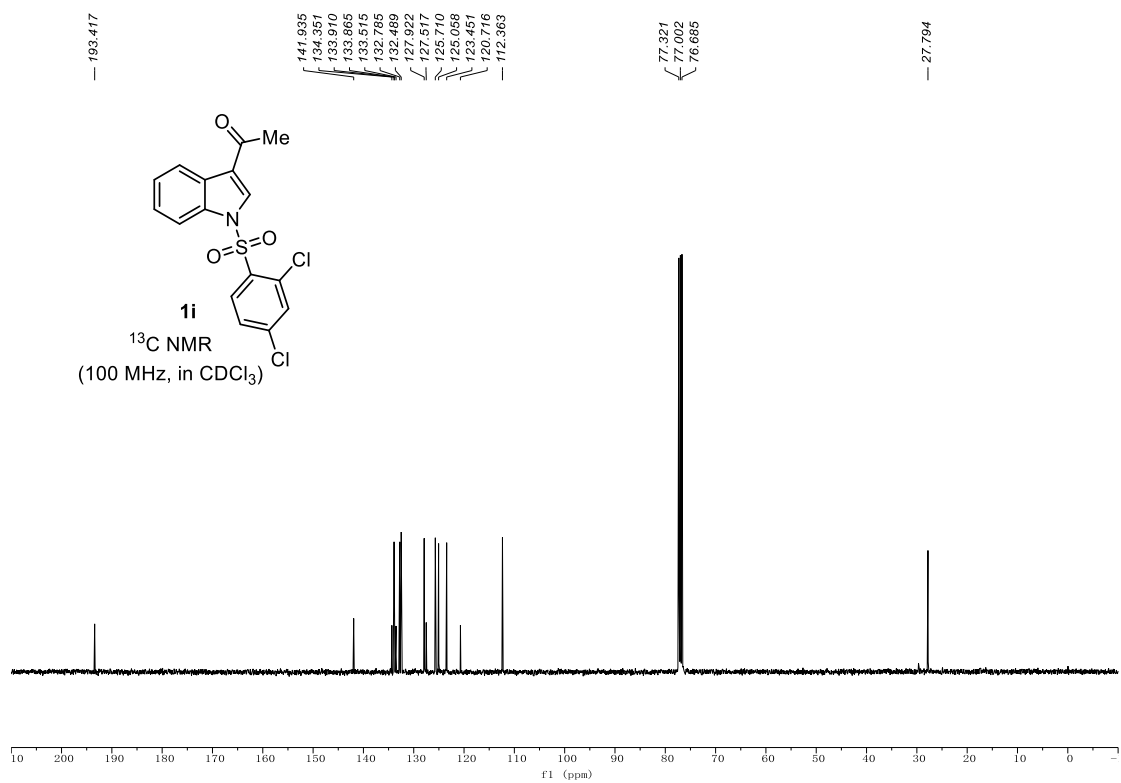

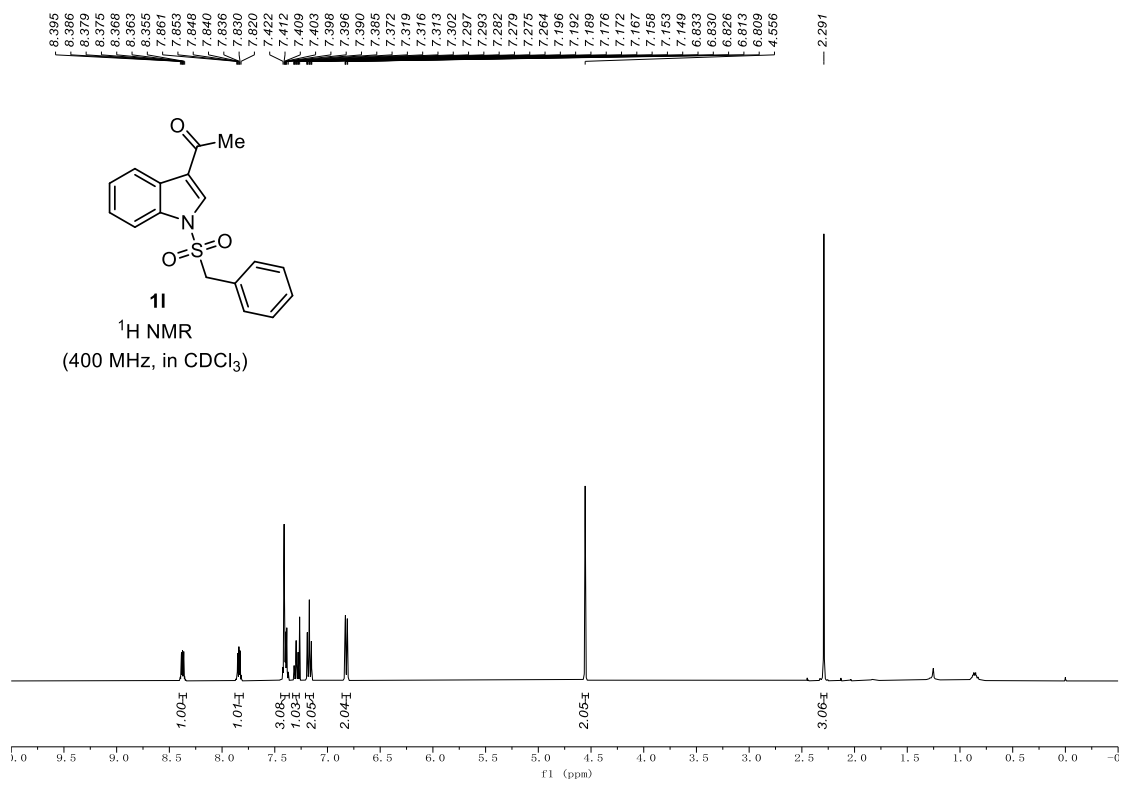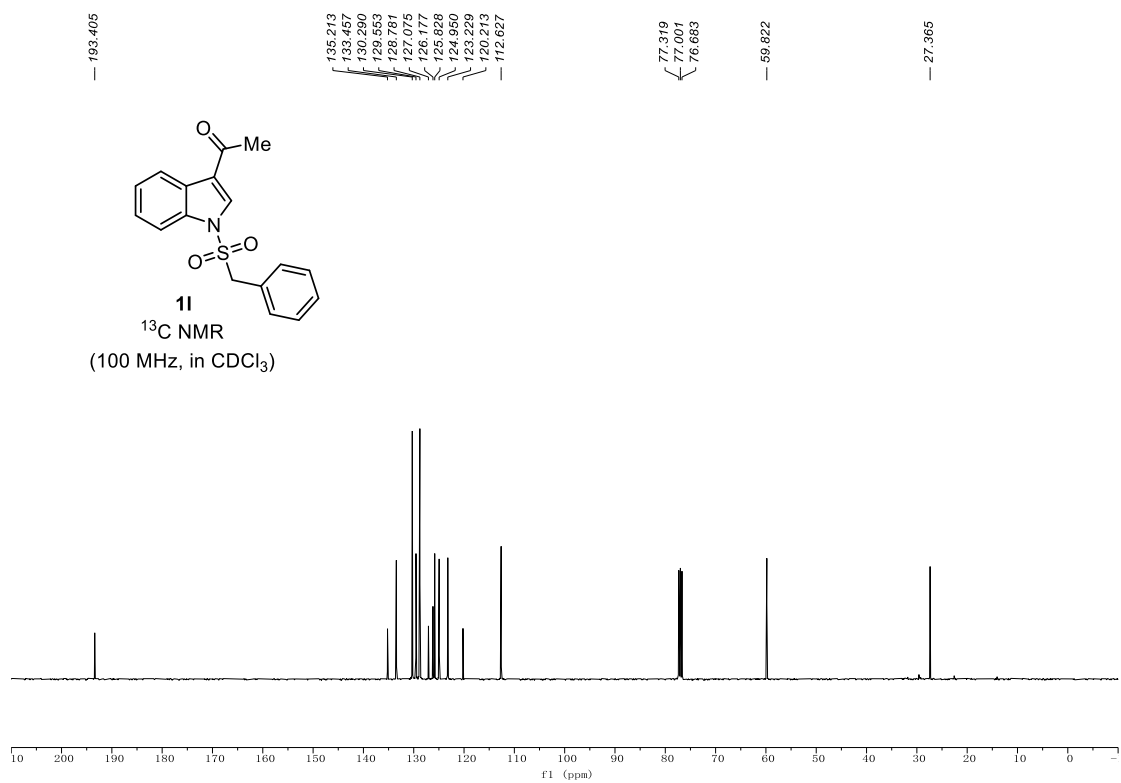

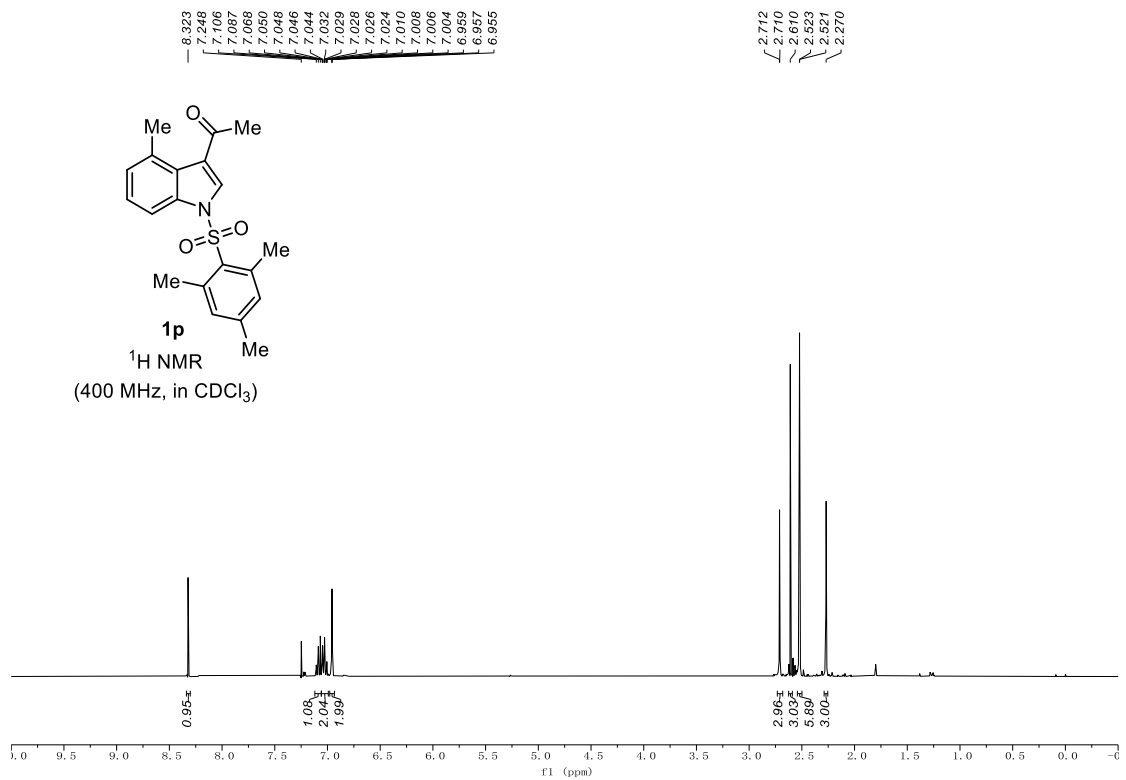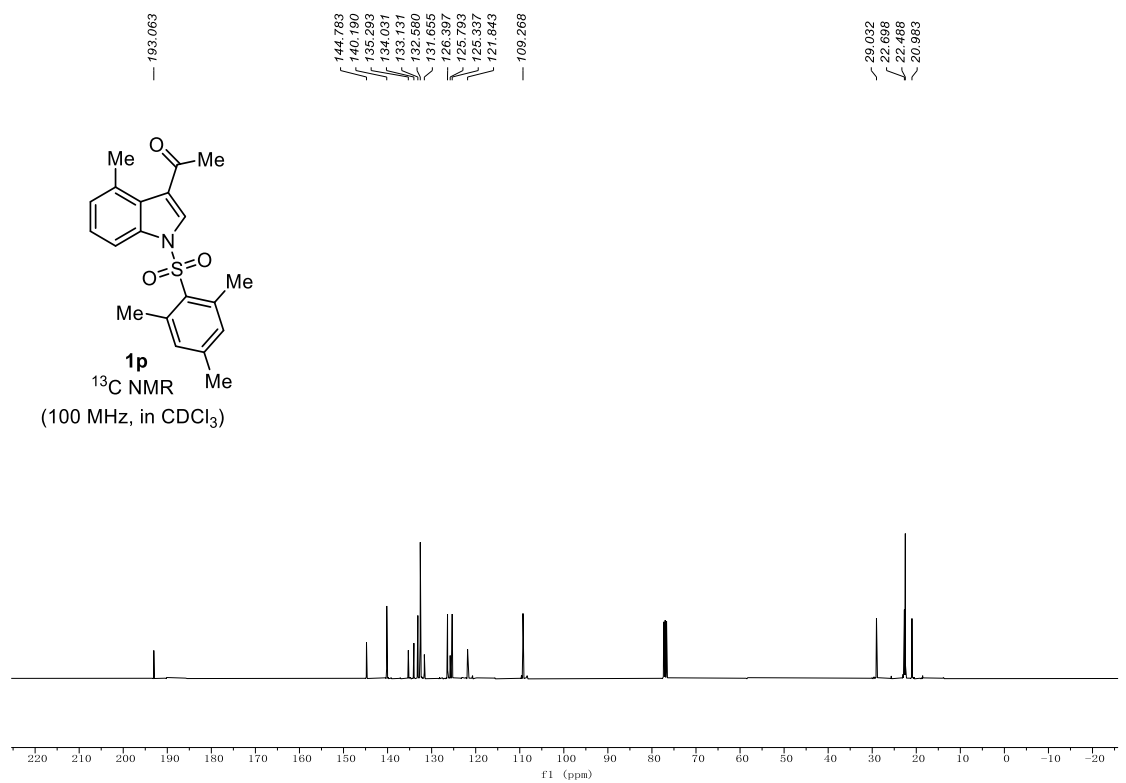

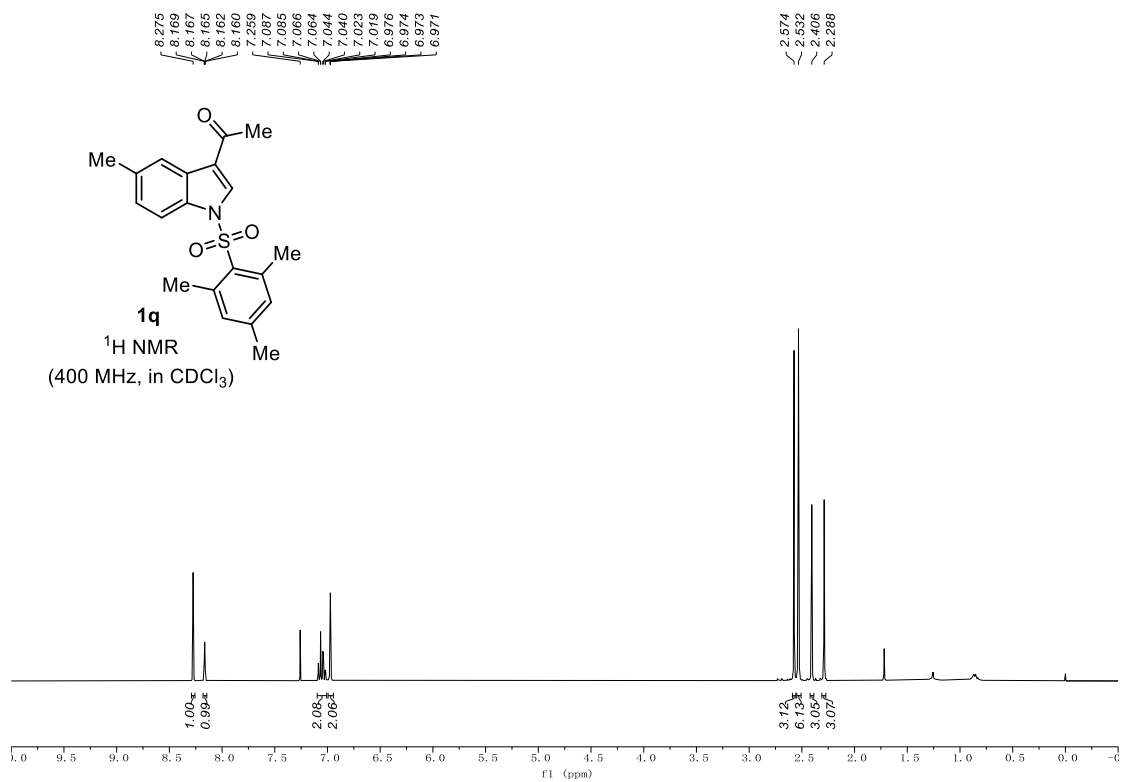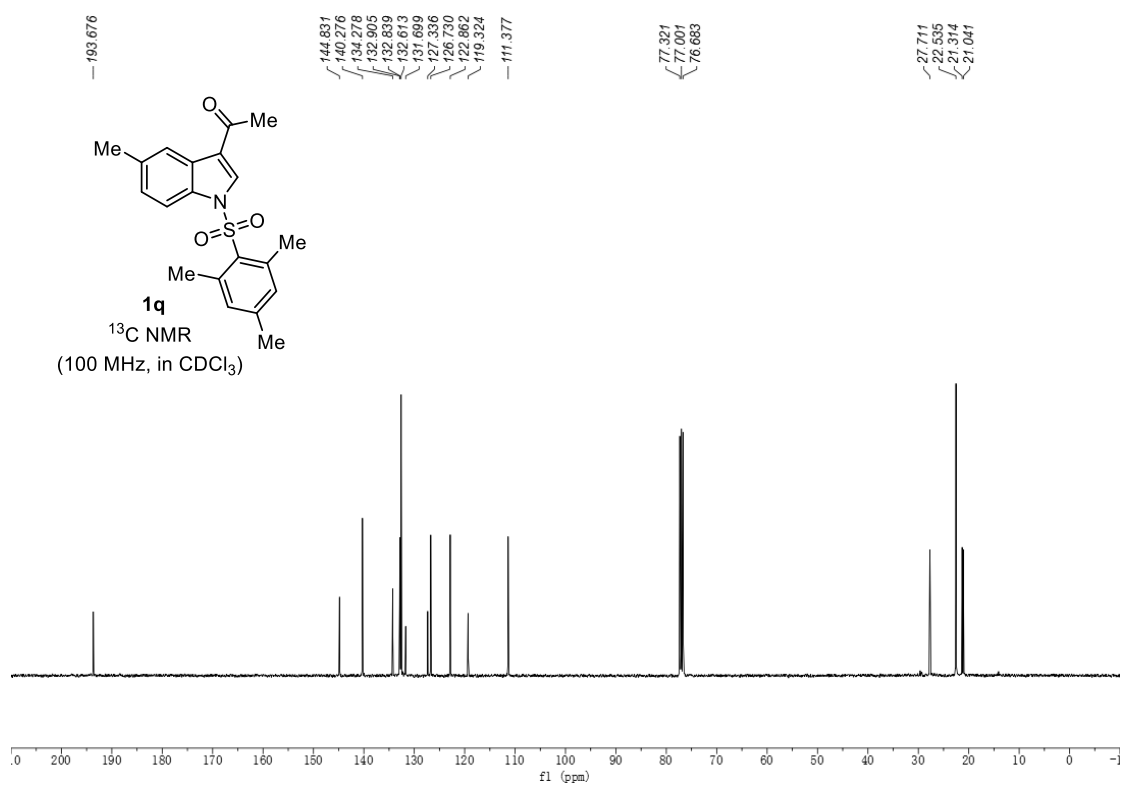

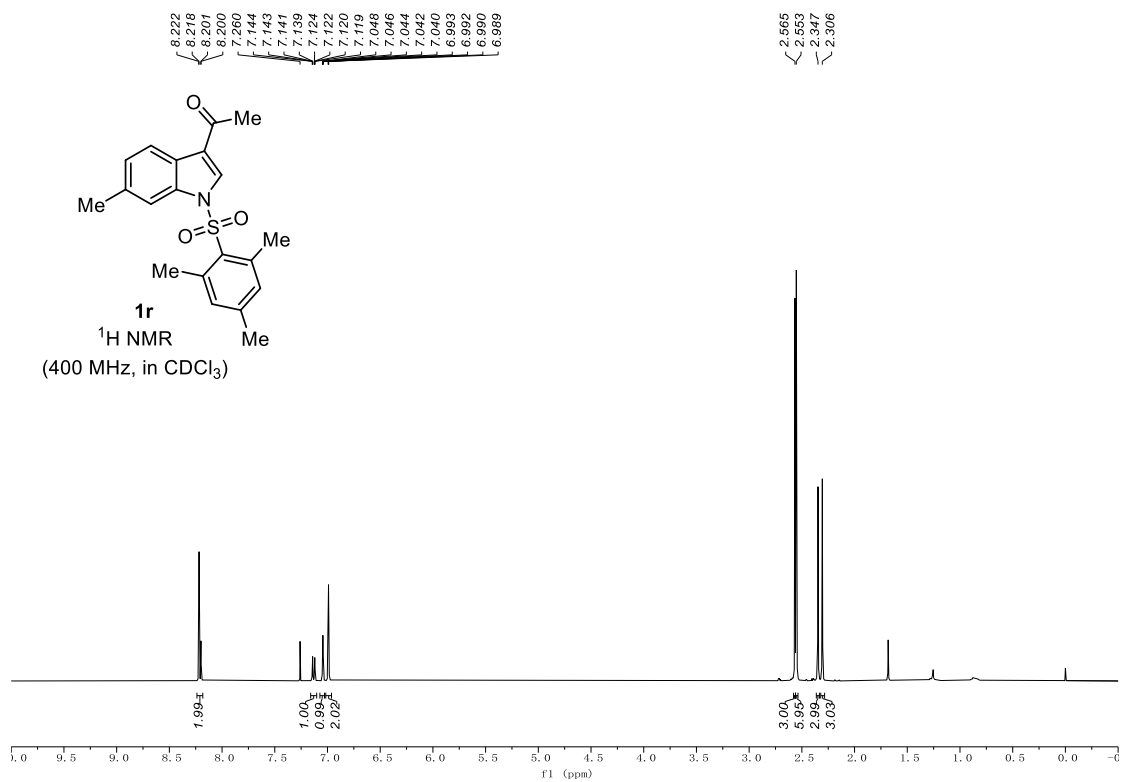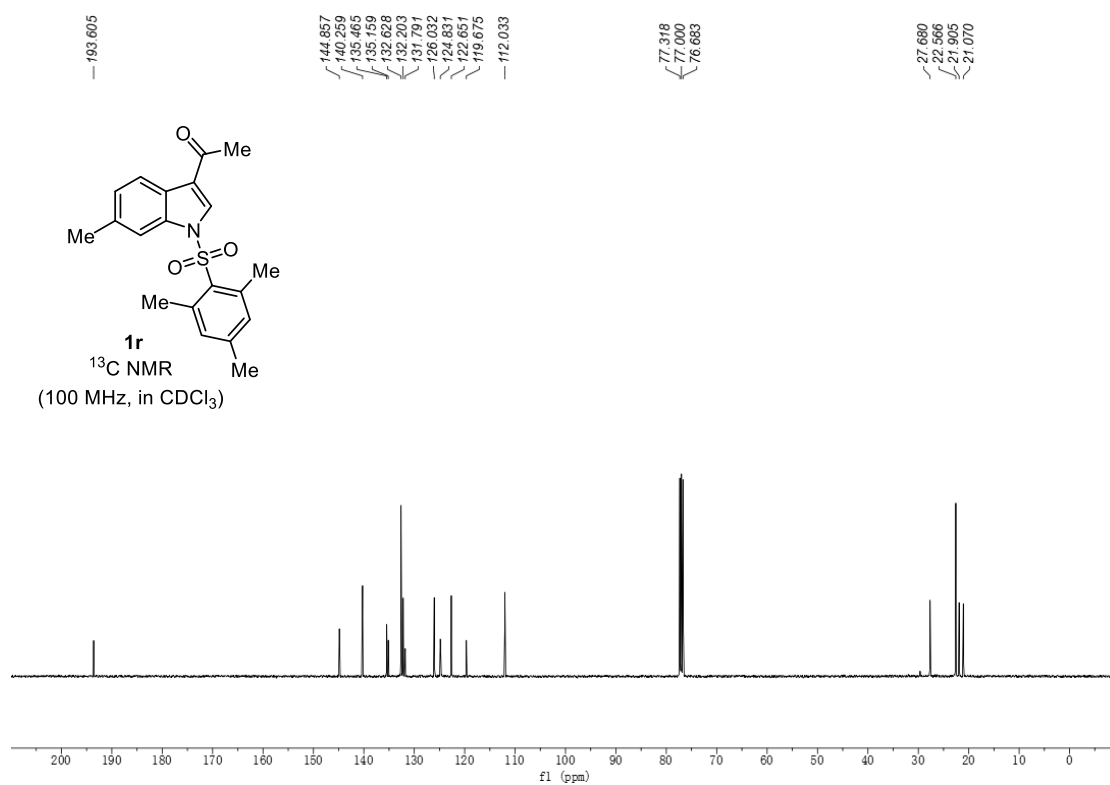

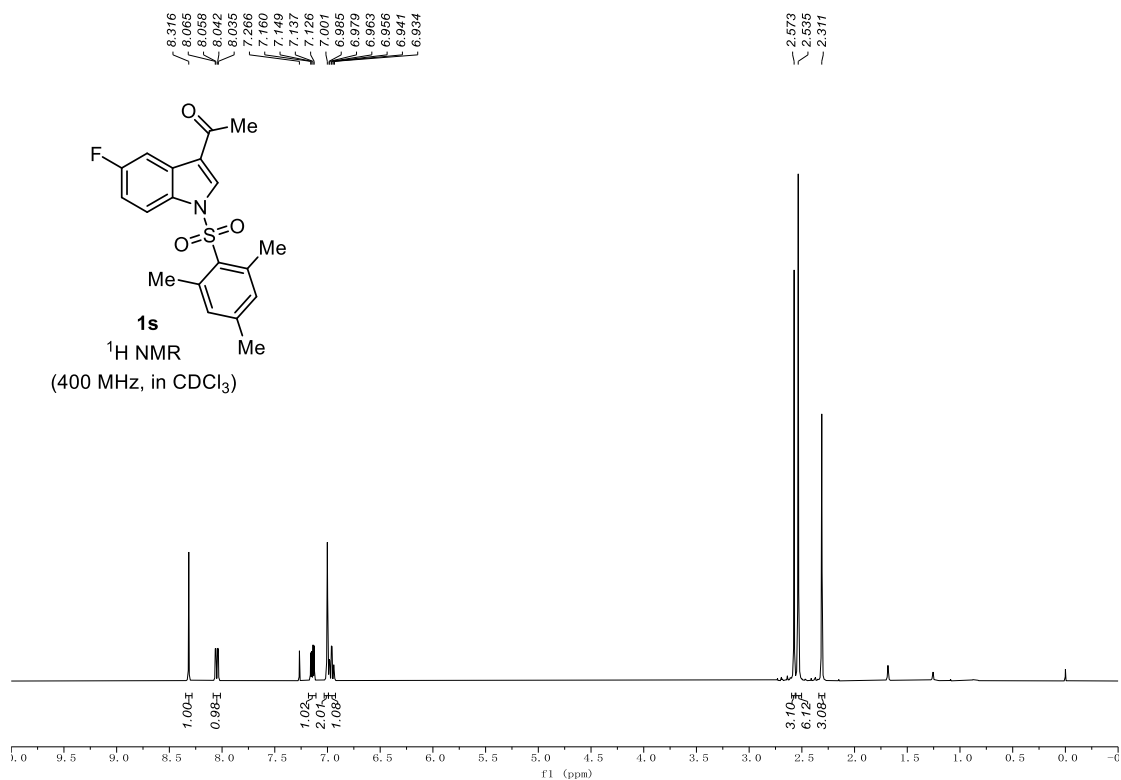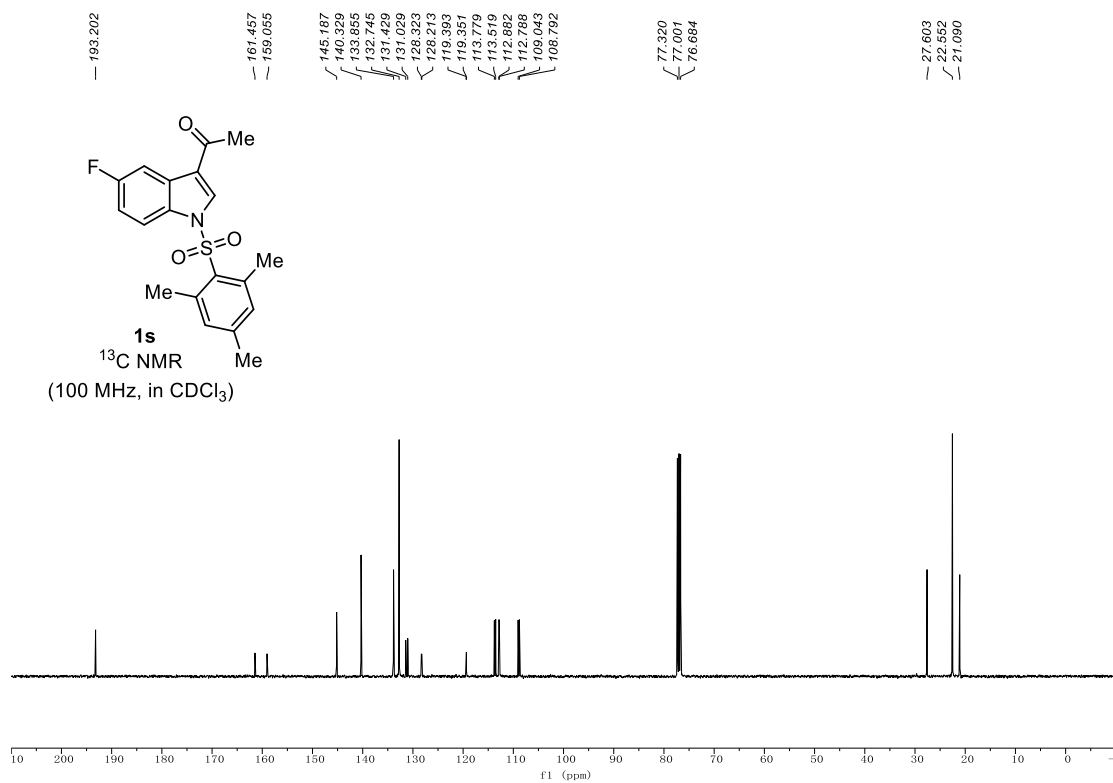



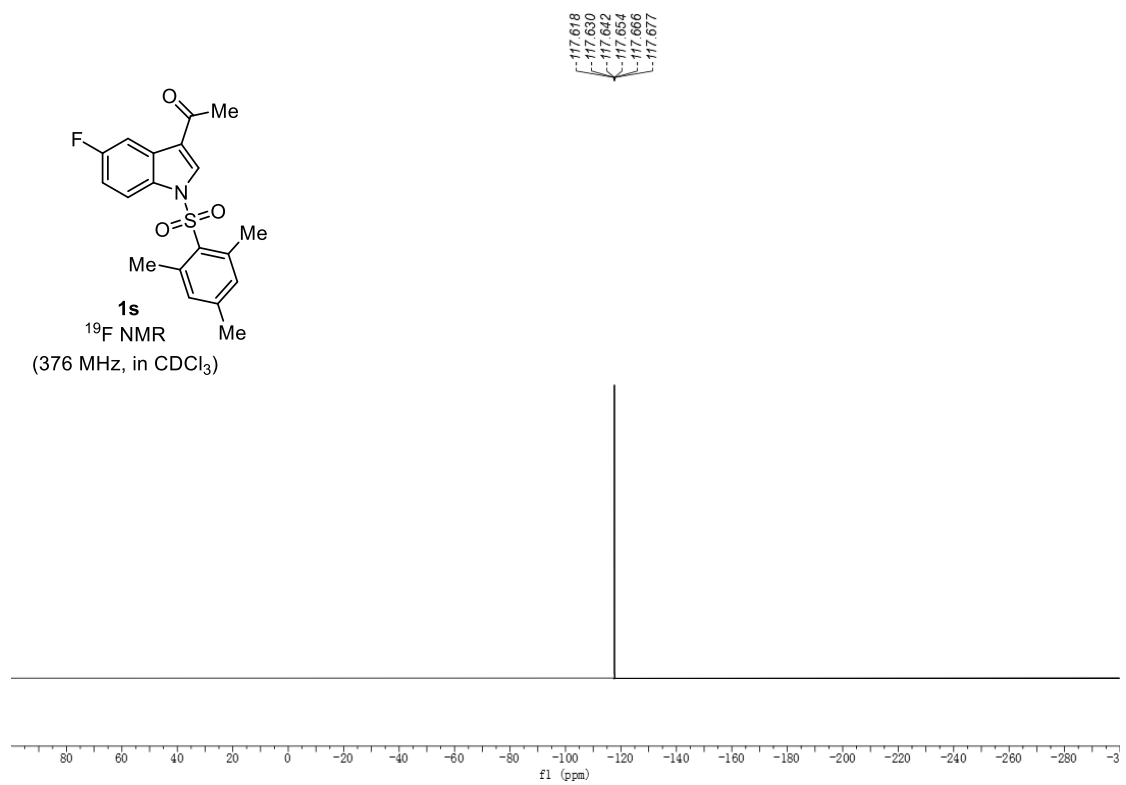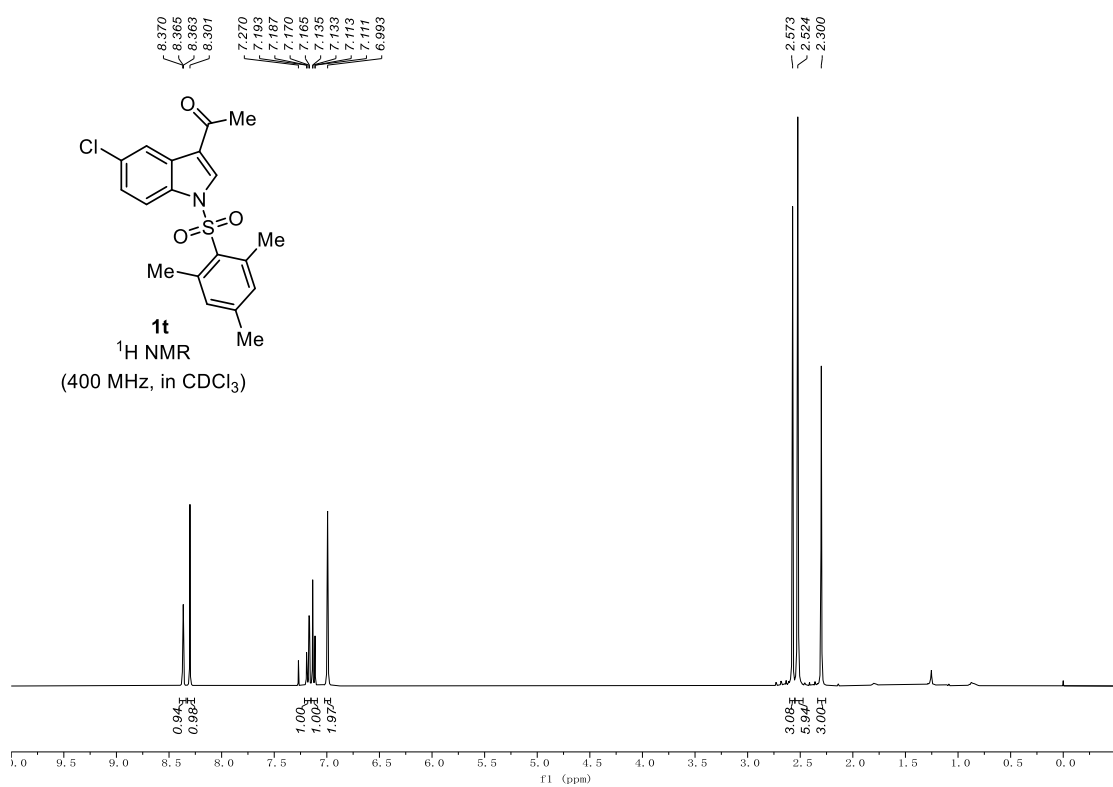

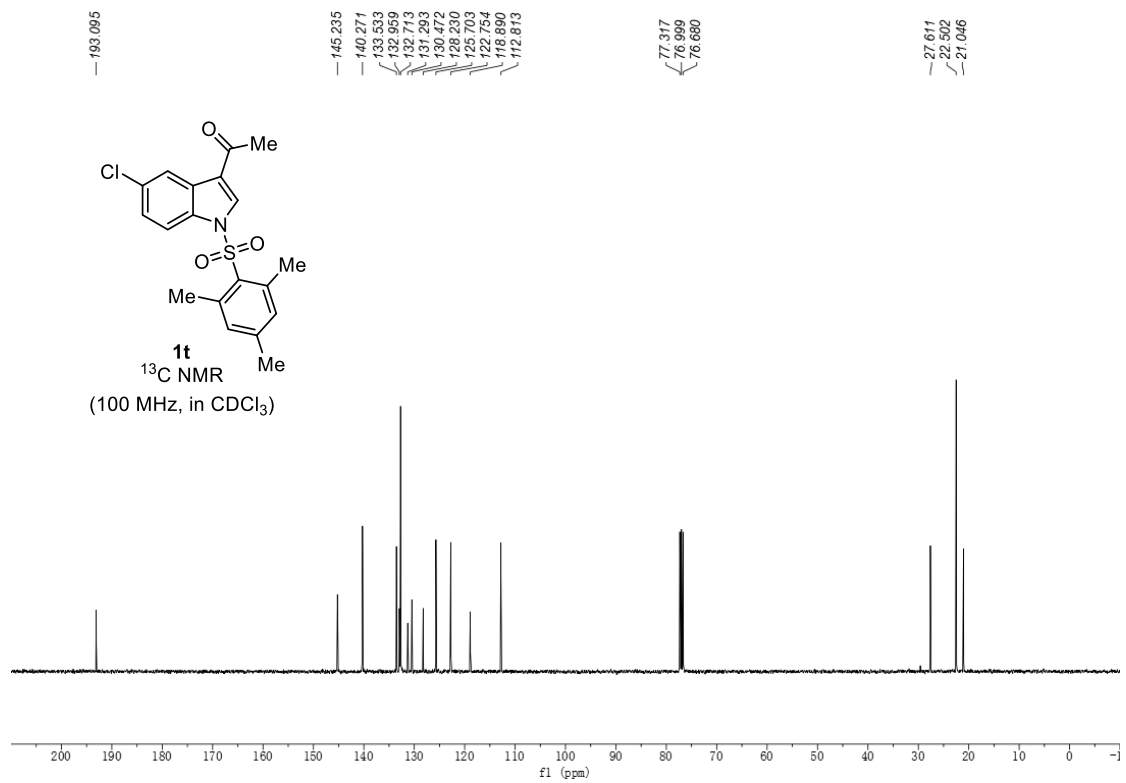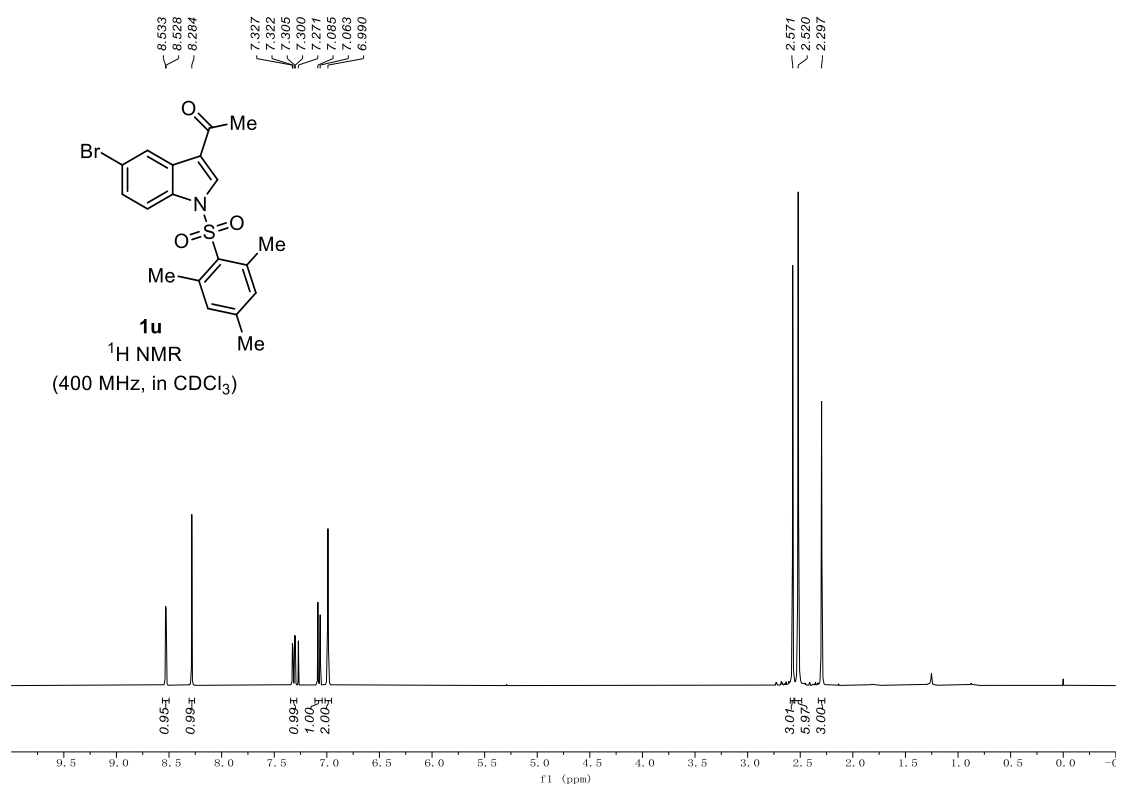

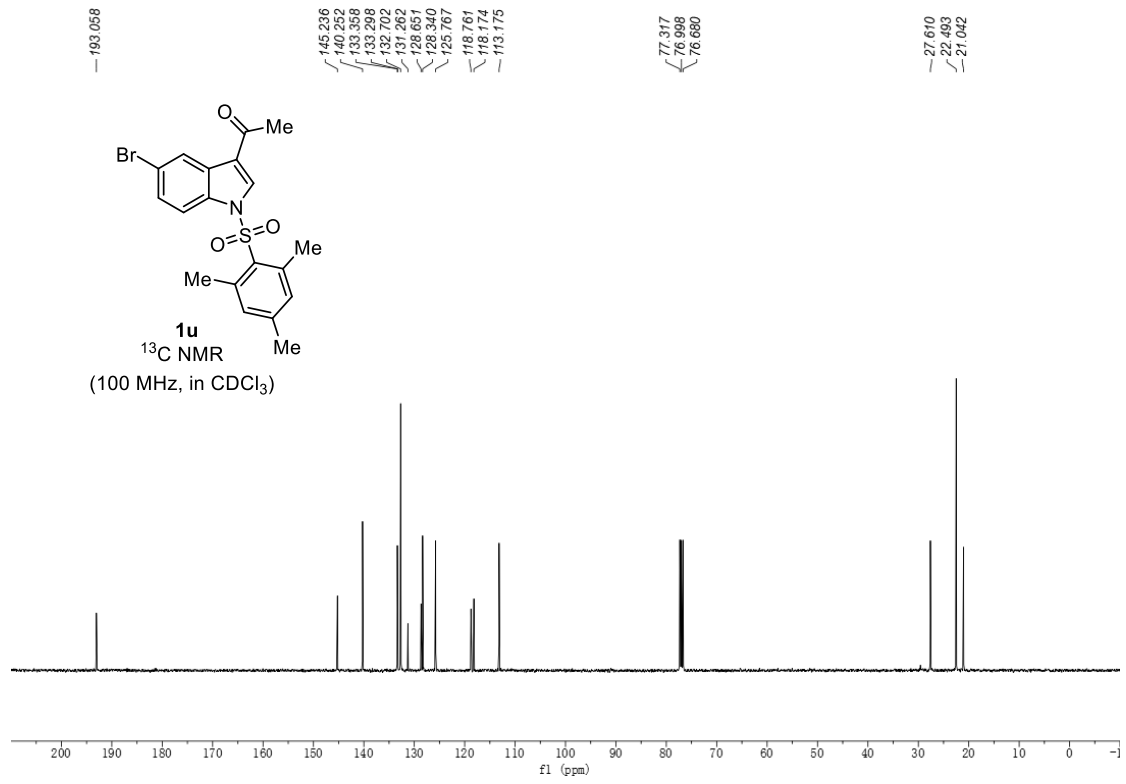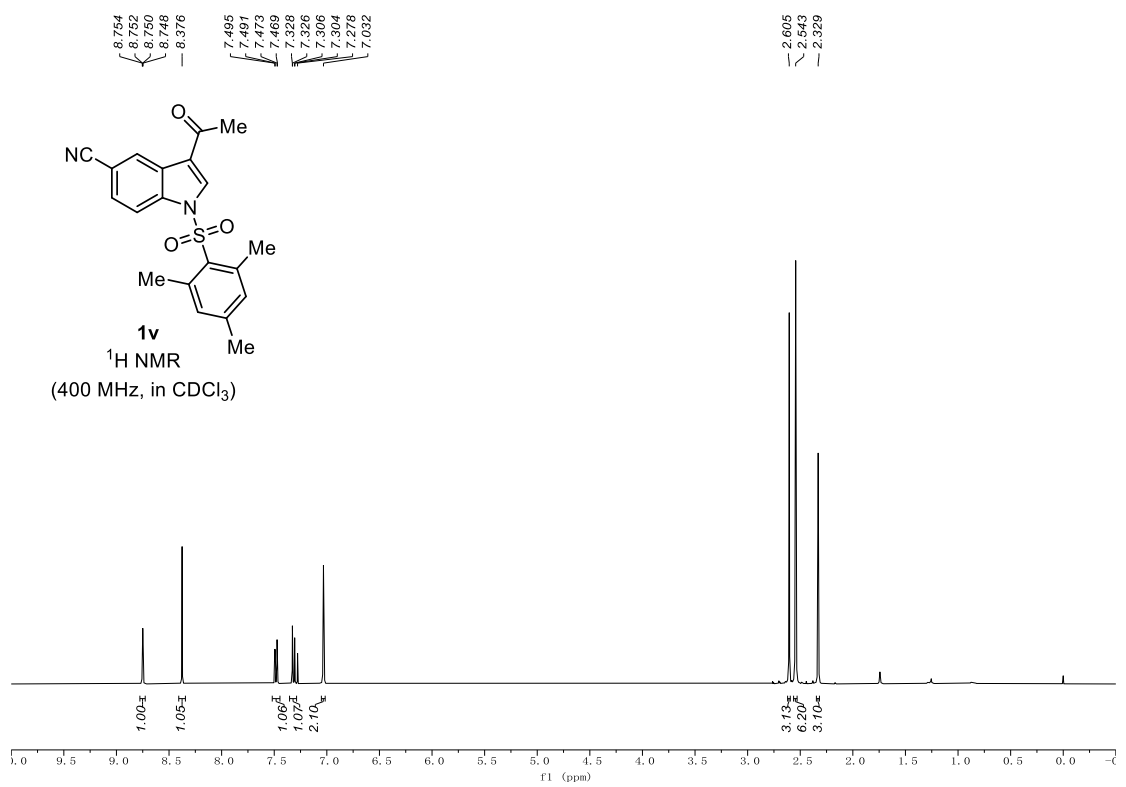

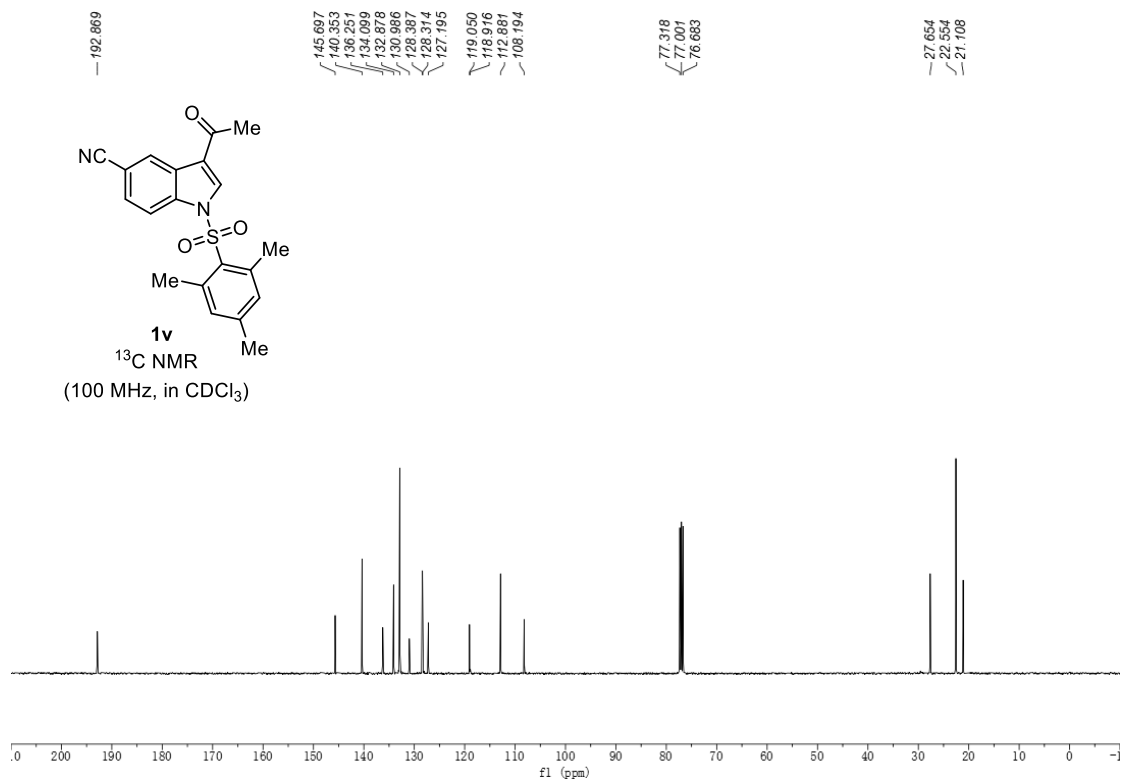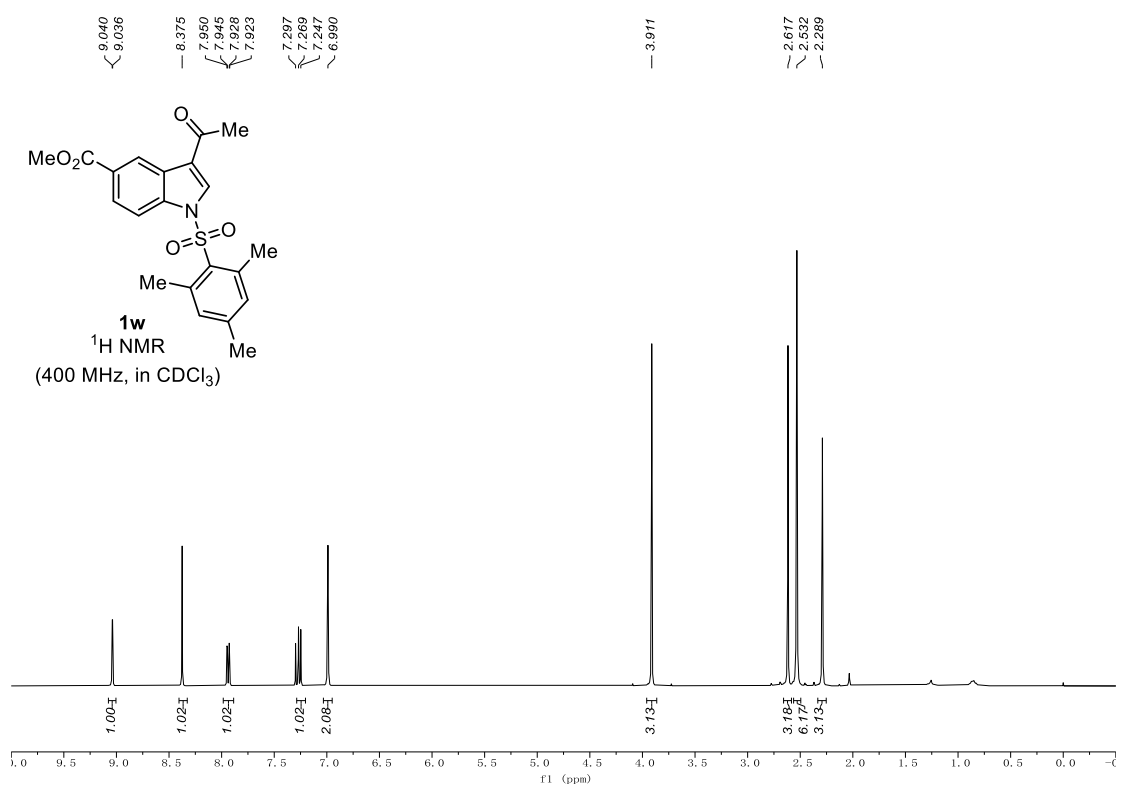

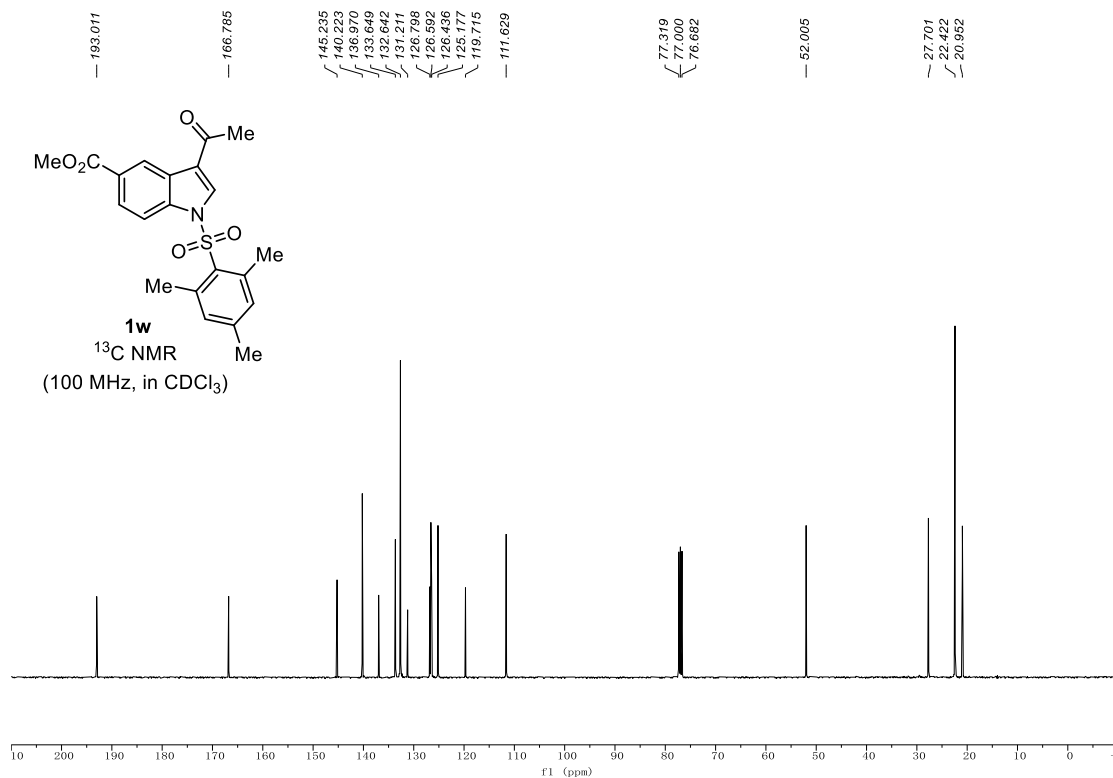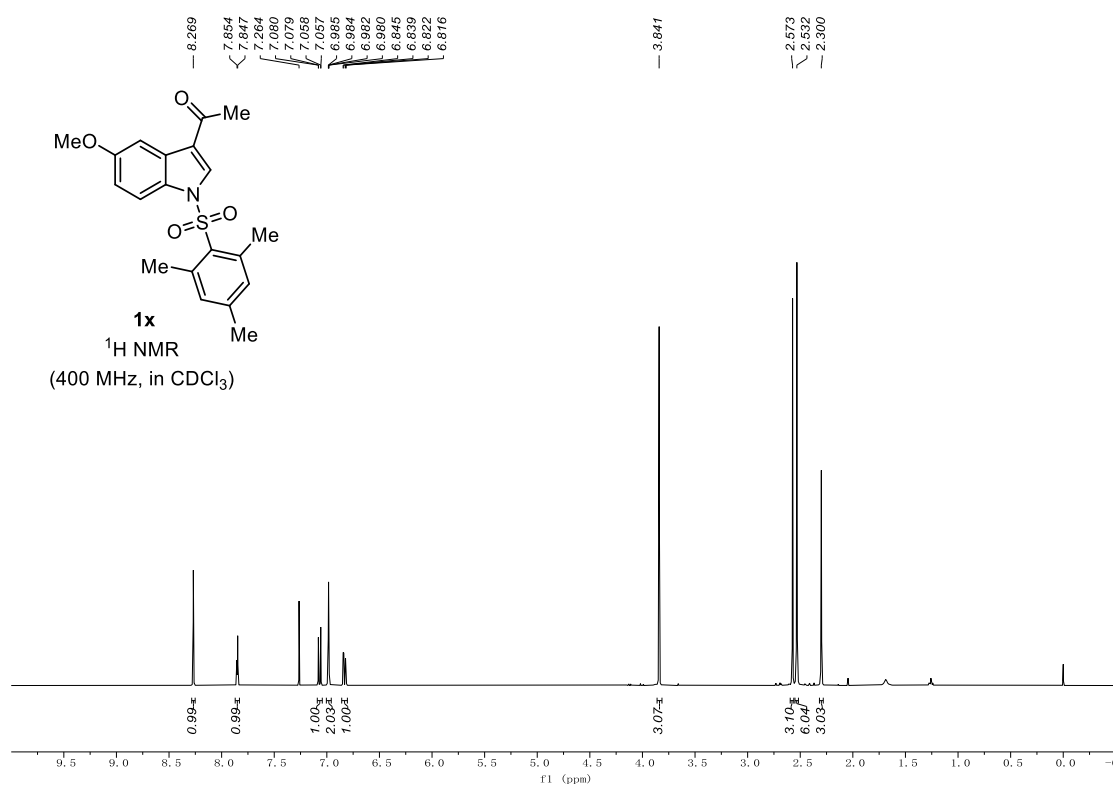

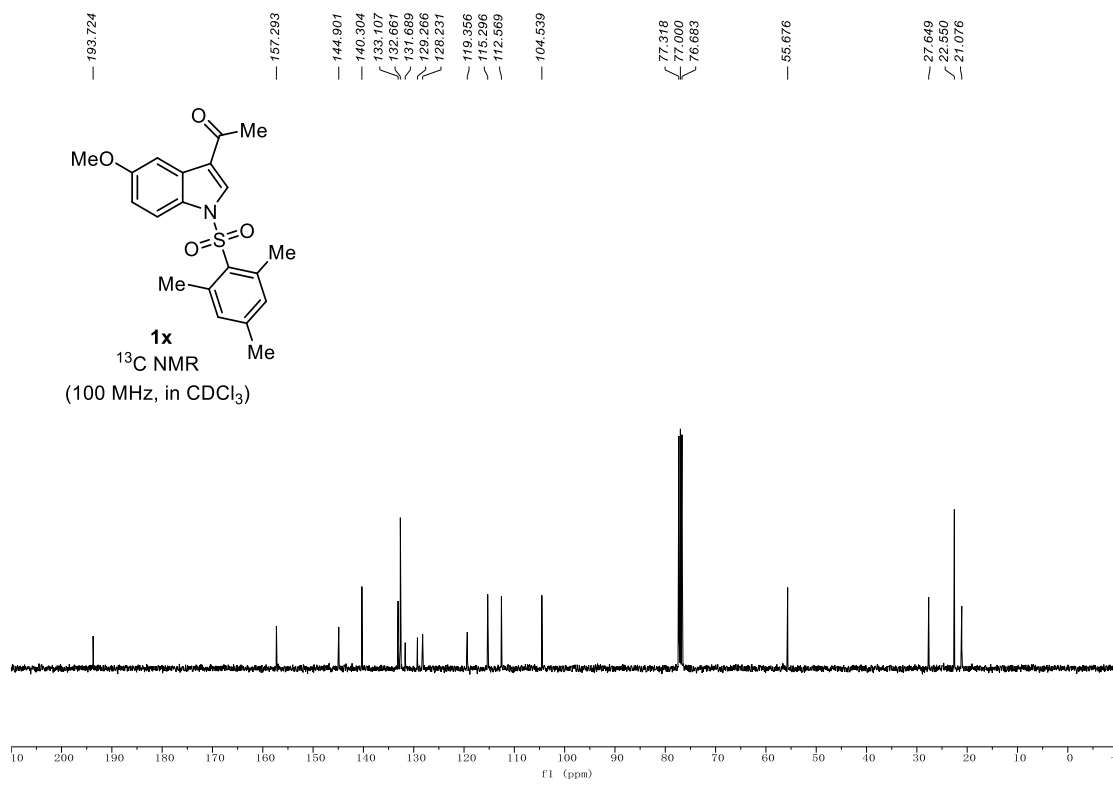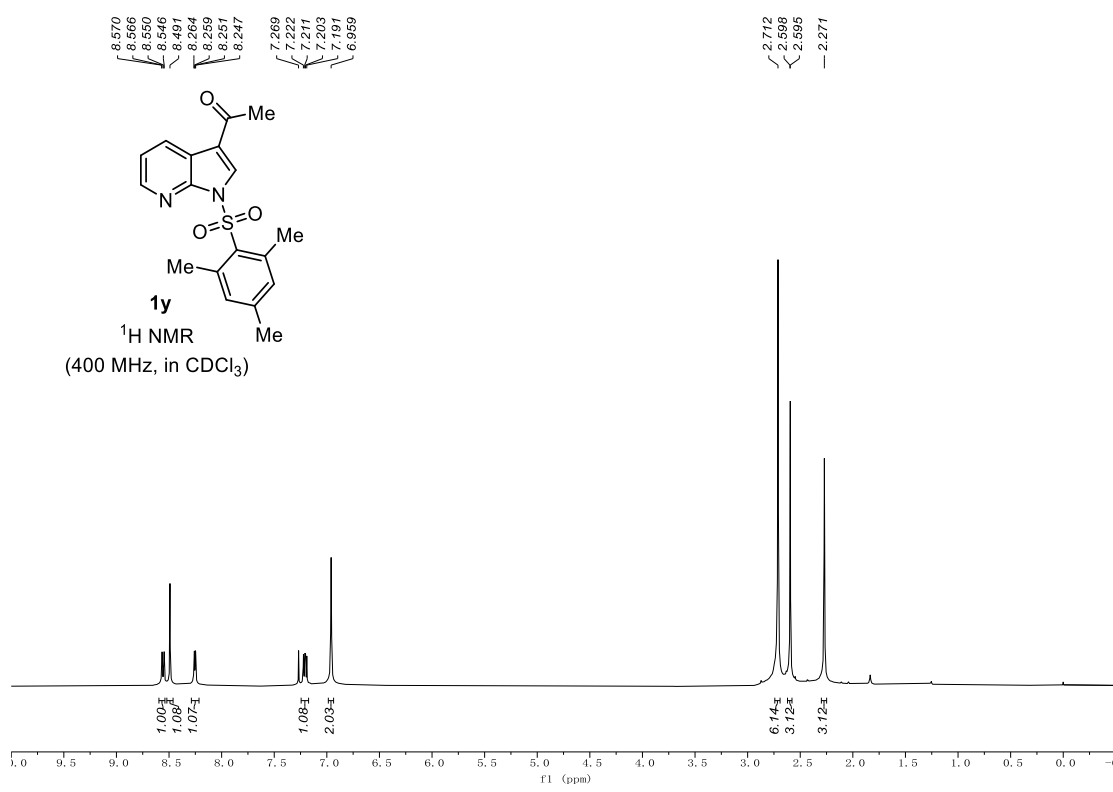

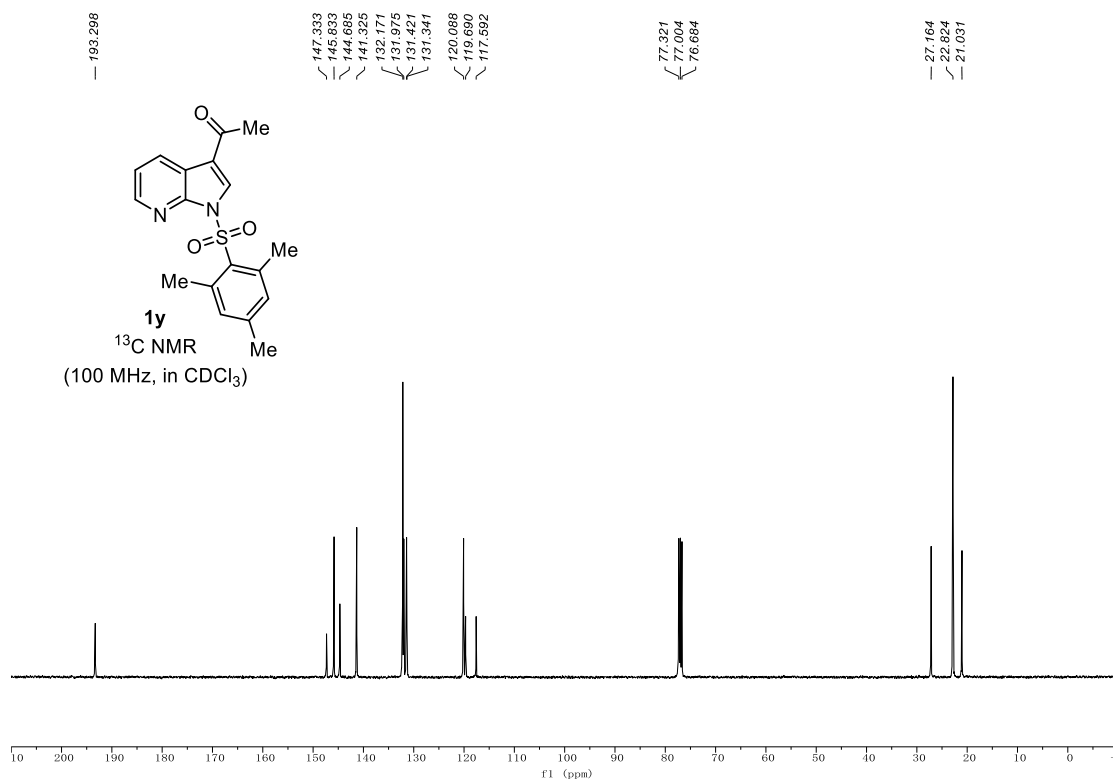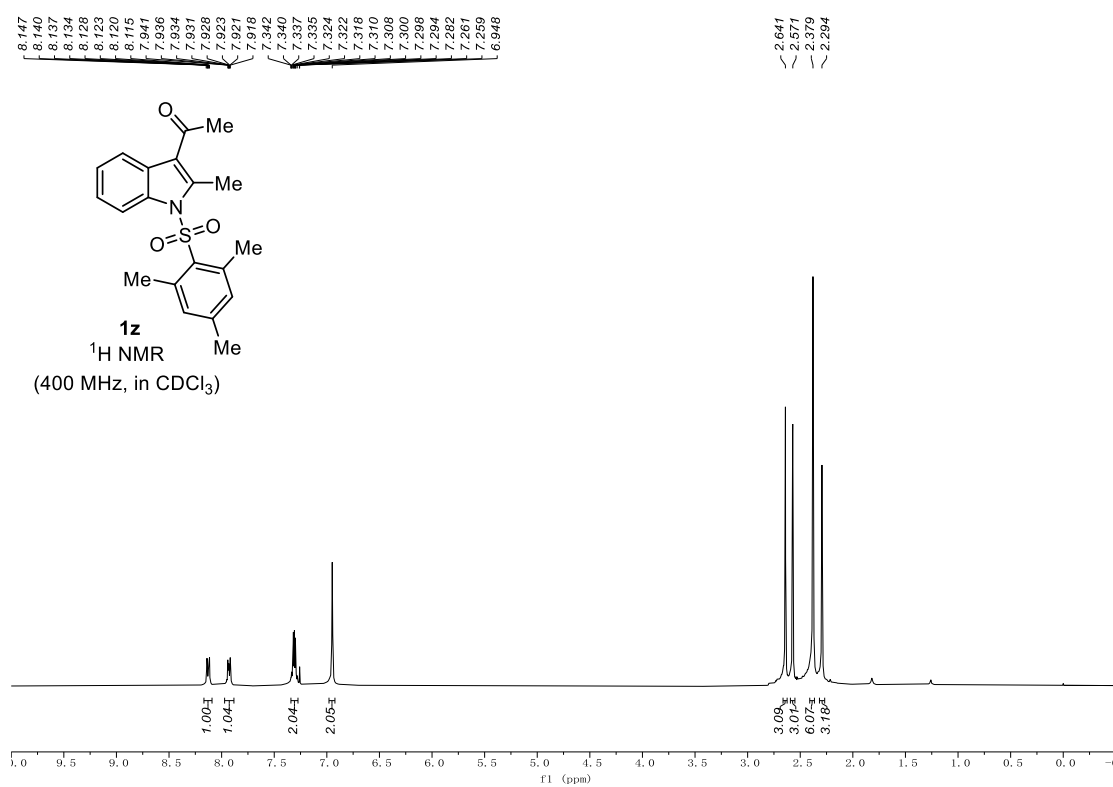

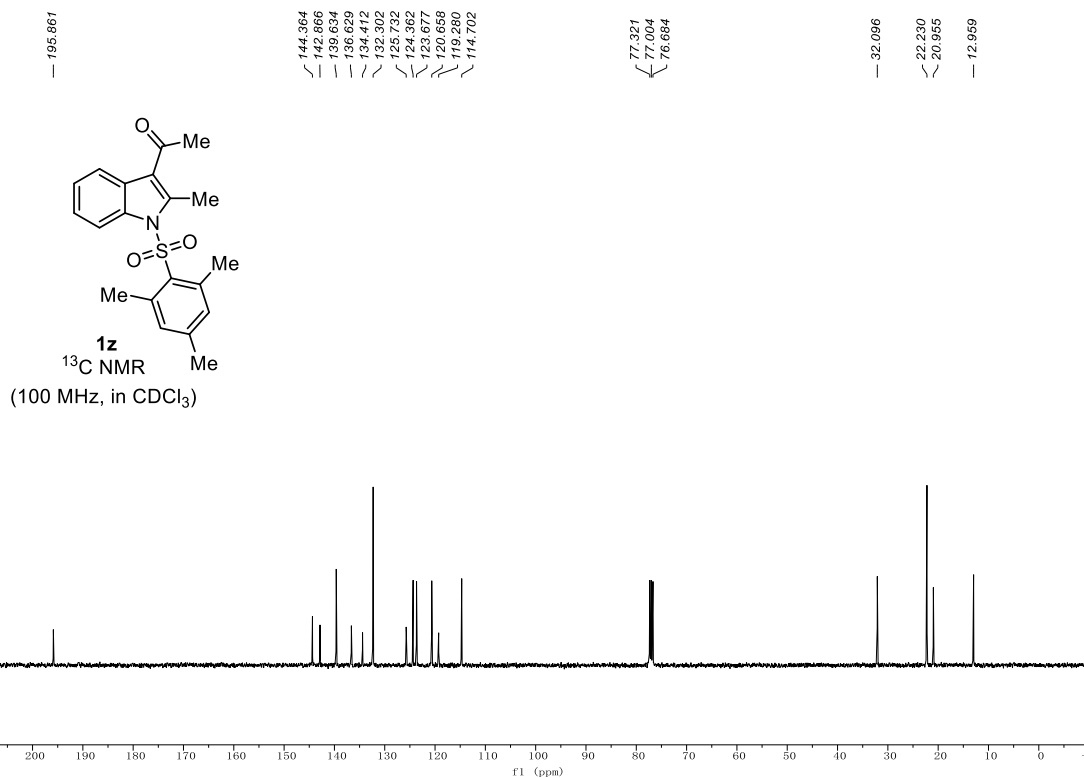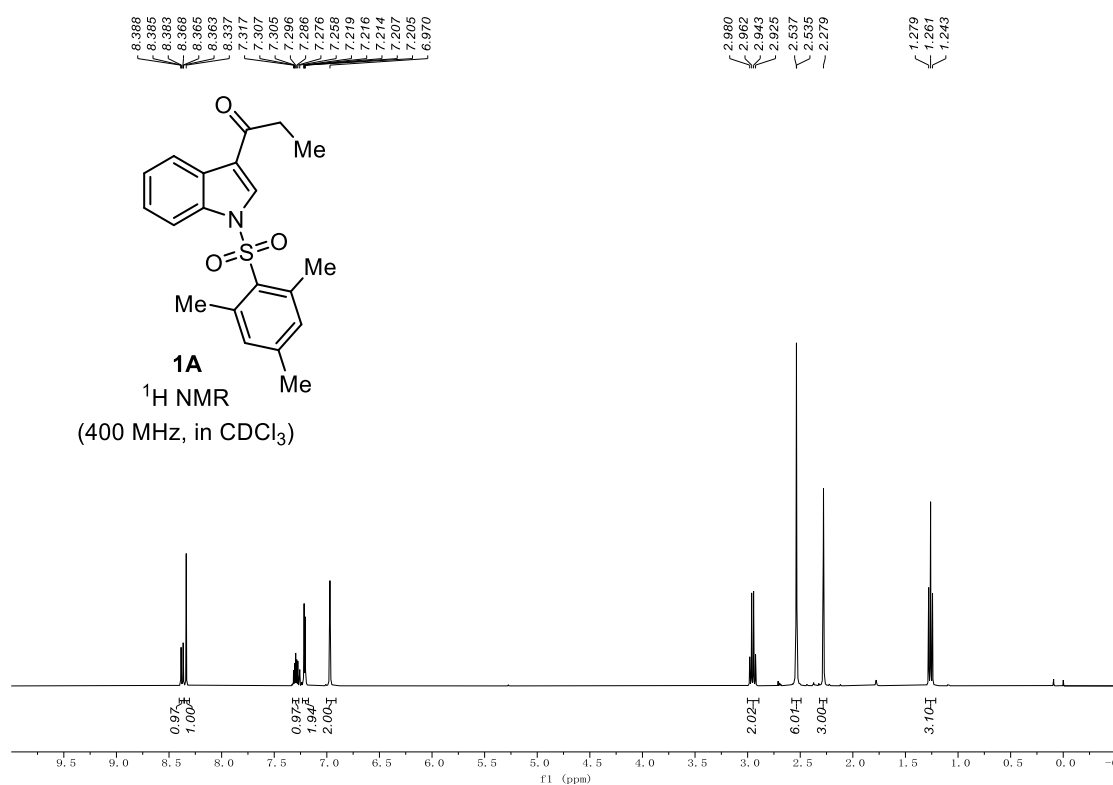



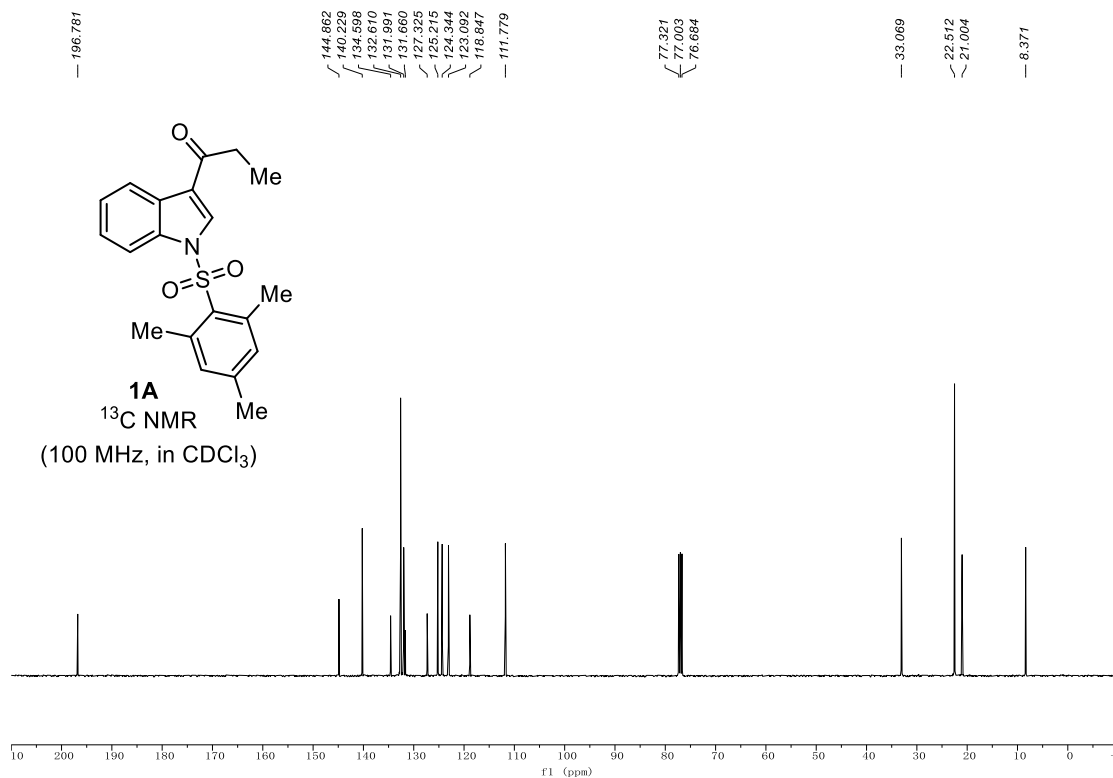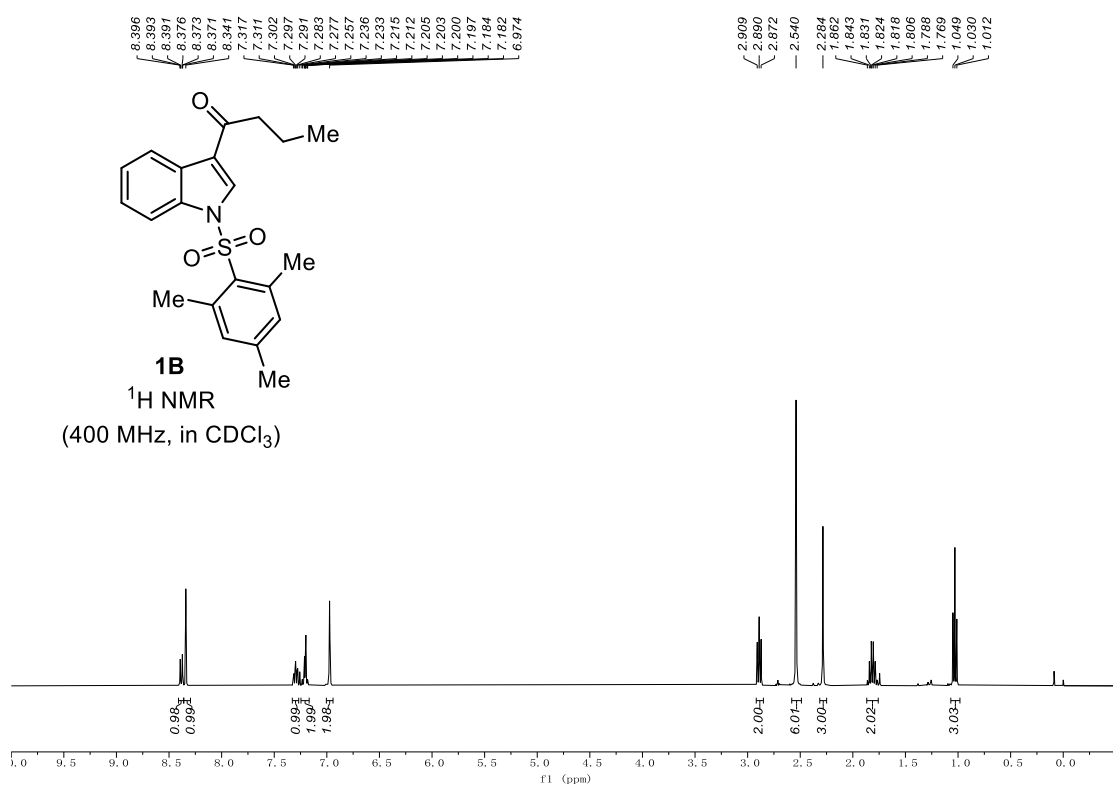

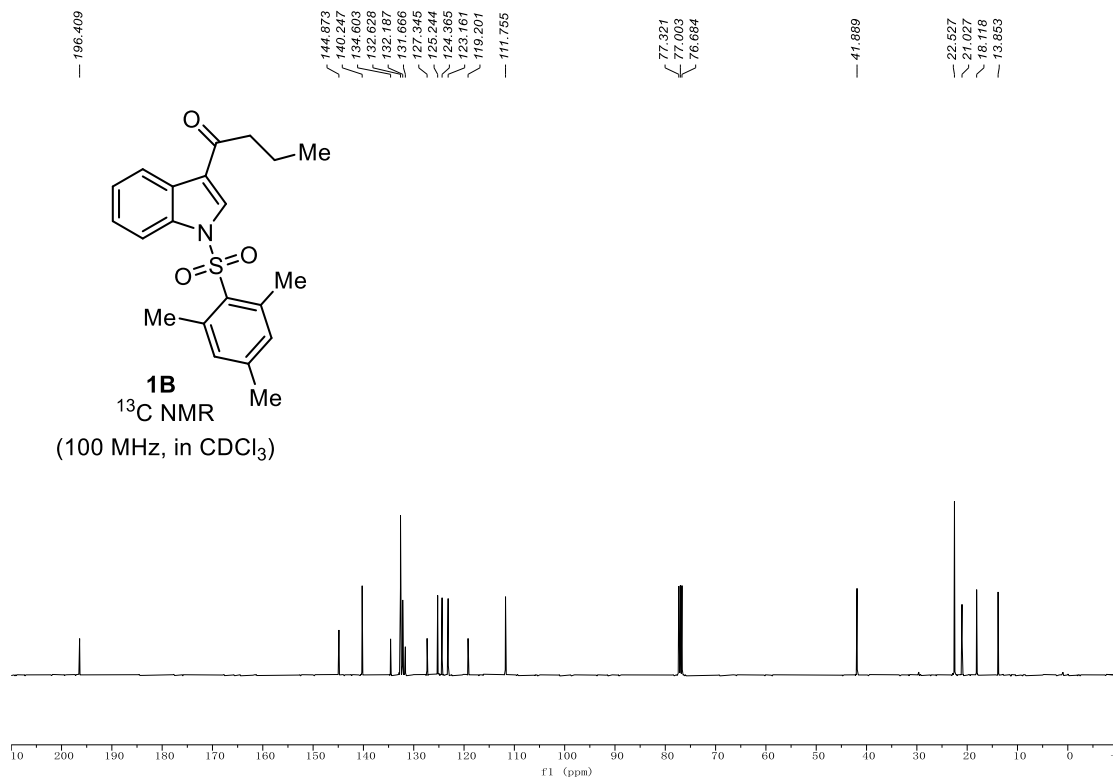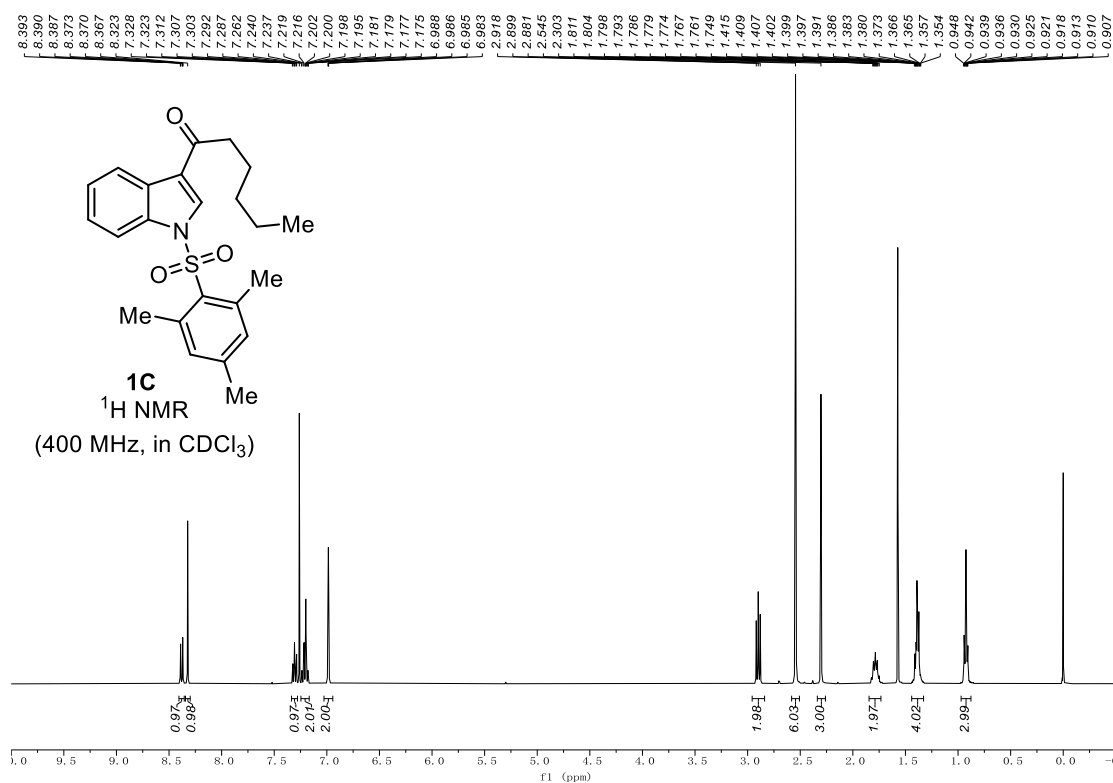

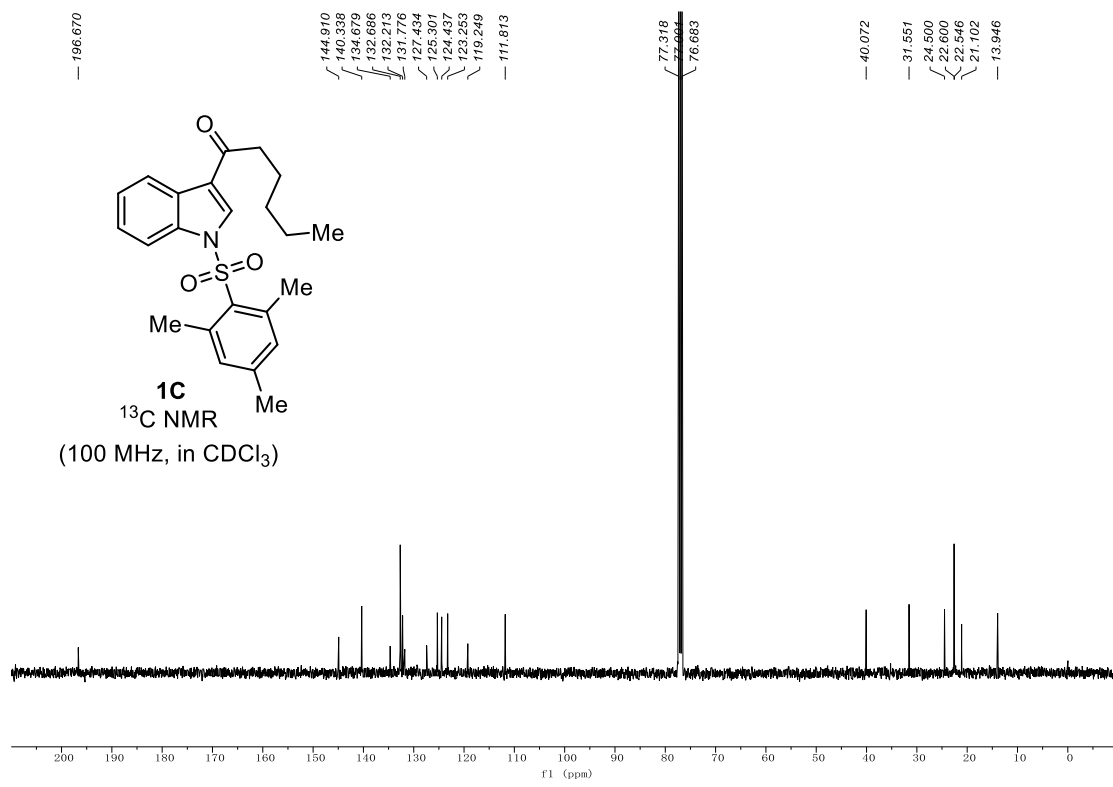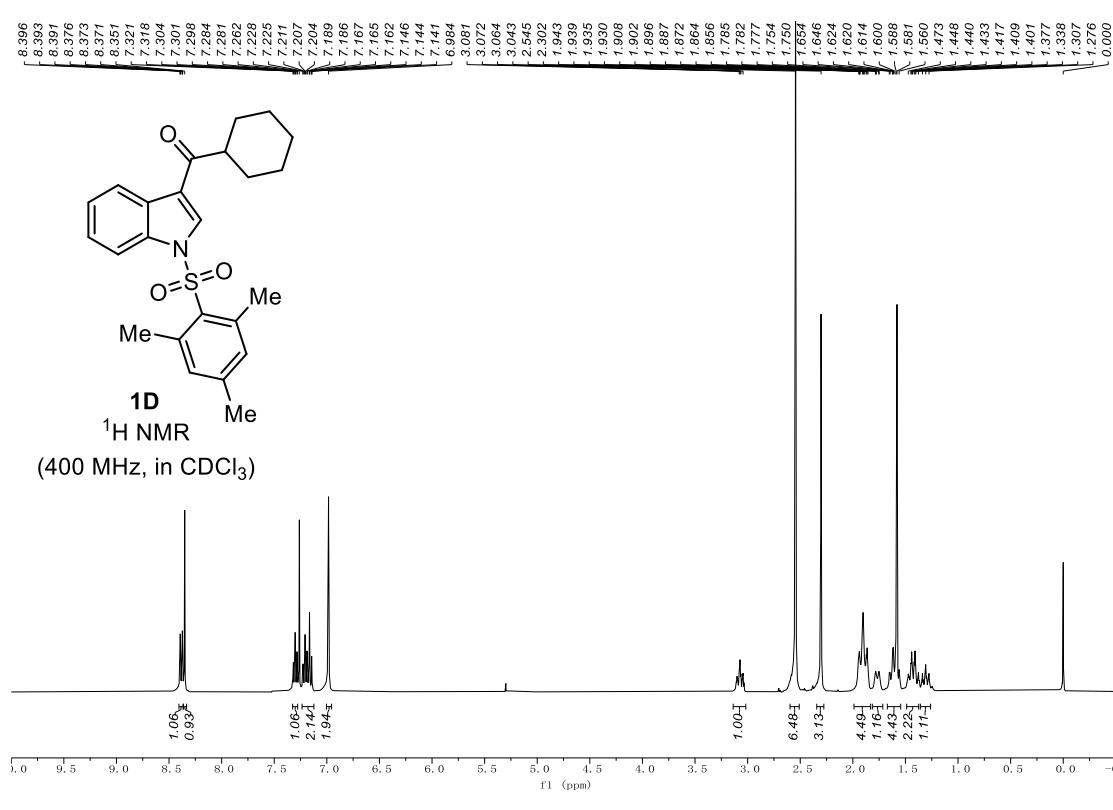

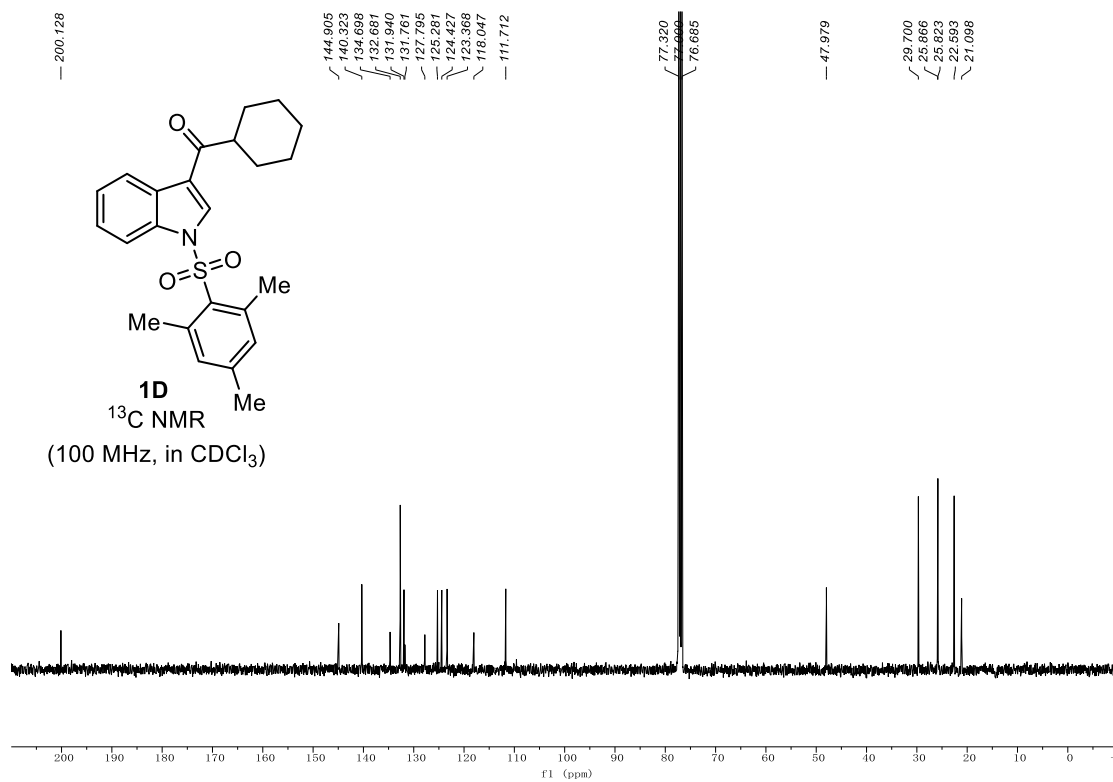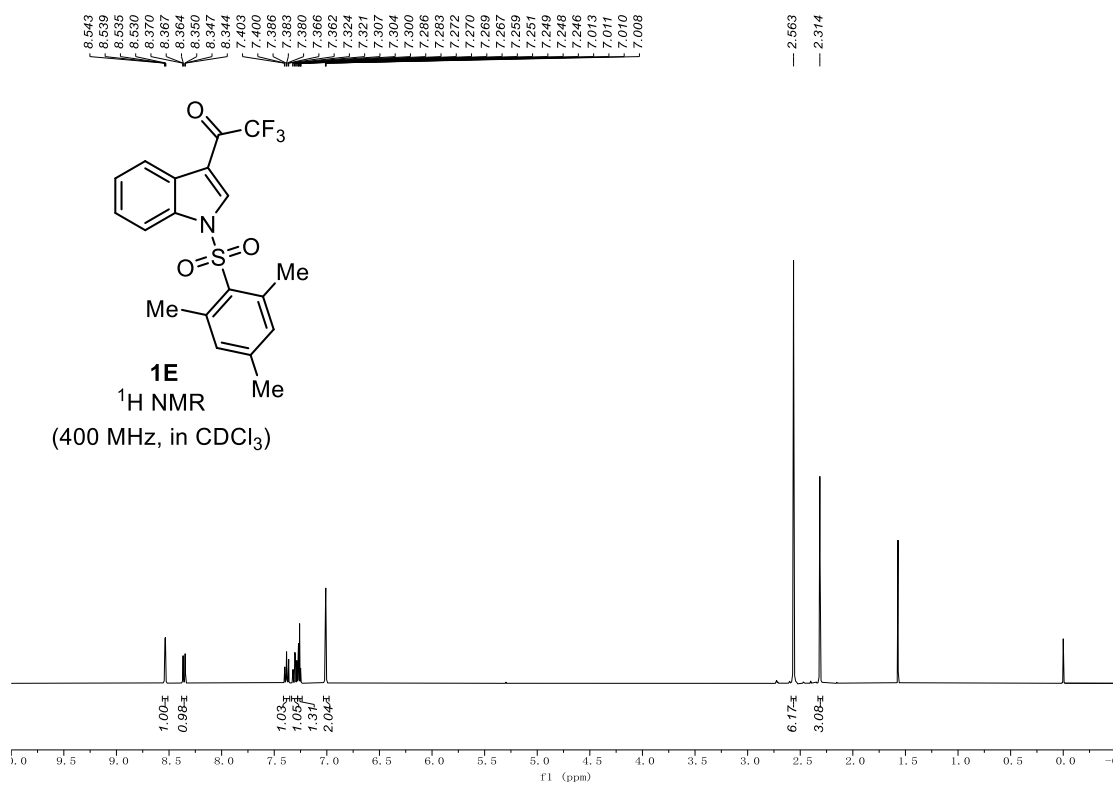

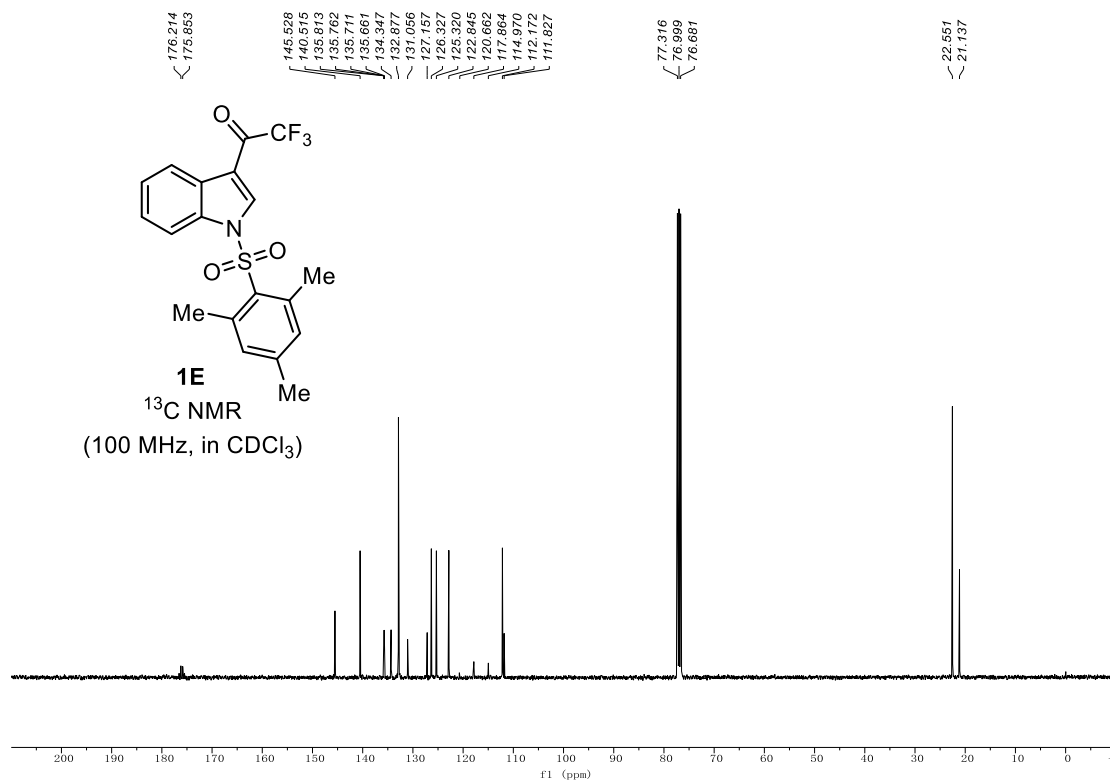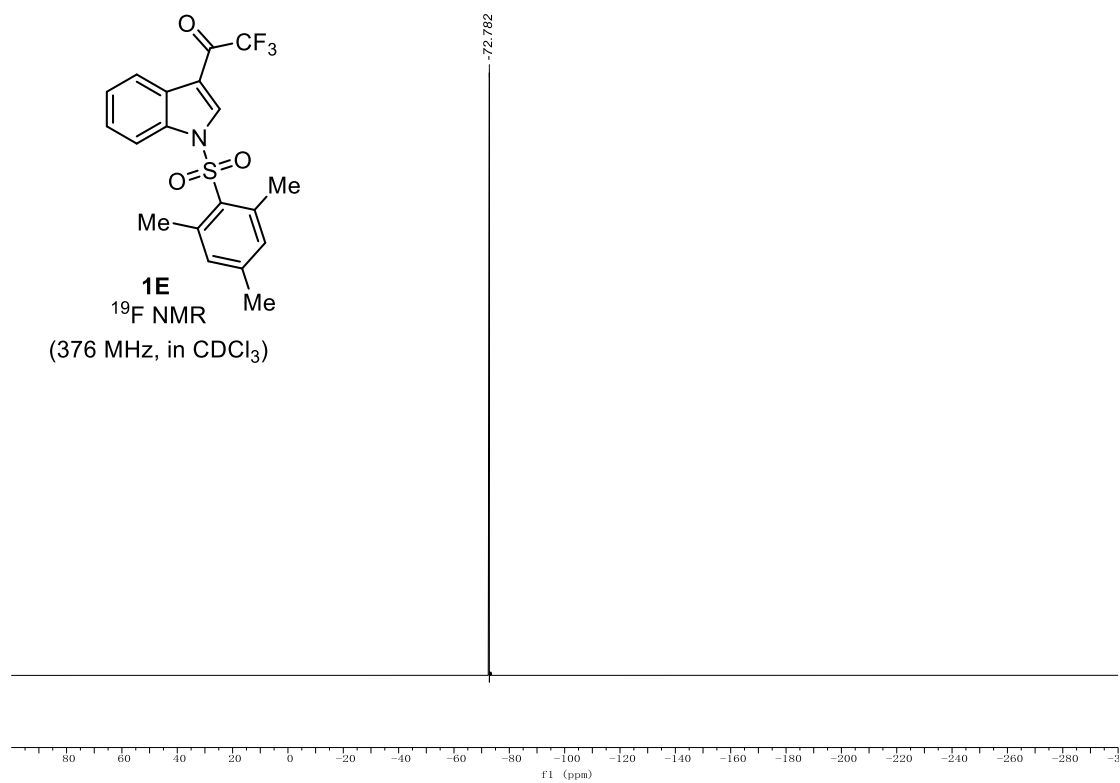

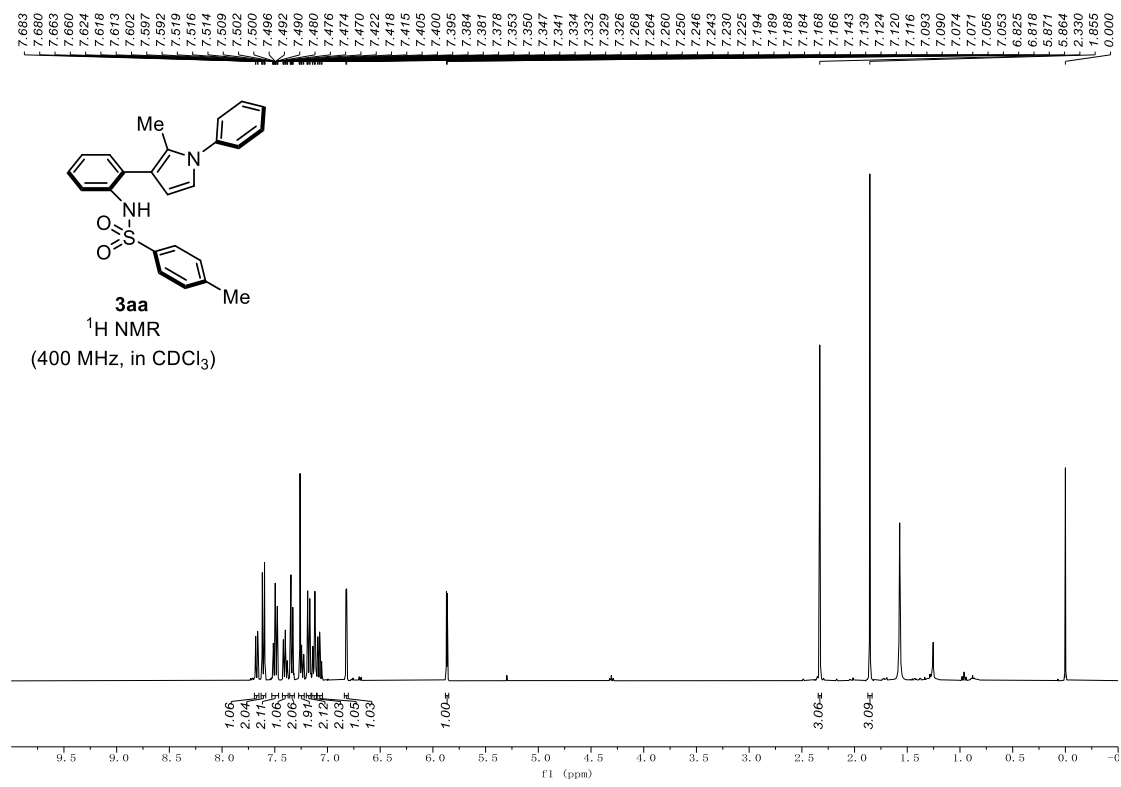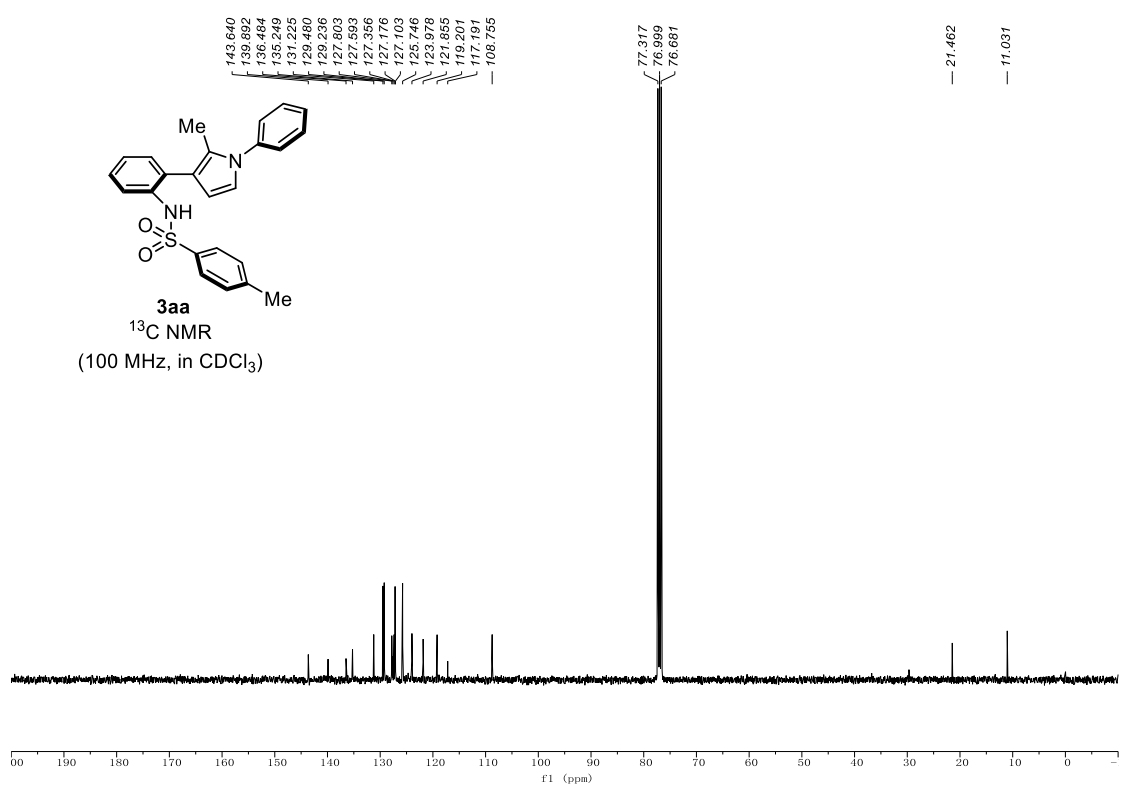

7.724  
7.721  
7.717  
7.708  
7.703  
7.699  
7.687  
7.684  
7.680  
7.604  
7.501  
7.498  
7.495  
7.486  
7.480  
7.475  
7.471  
7.466  
7.461  
7.458  
7.413  
7.410  
7.407  
7.396  
7.392  
7.386  
7.380  
7.376  
7.372  
7.362  
7.358  
7.340  
7.336  
7.331  
7.322  
7.316  
7.314  
7.314  
7.269  
7.256  
7.252  
7.249  
7.249  
7.236  
7.231  
7.158  
7.143  
7.138  
7.123  
7.119  
7.099  
7.096  
7.081  
7.078  
7.062  
7.059  
6.816  
6.808  
5.842  
5.834  
1.827

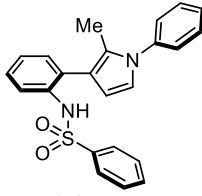

**3ab**

<sup>1</sup>H NMR

(400 MHz, in CDCl<sub>3</sub>)

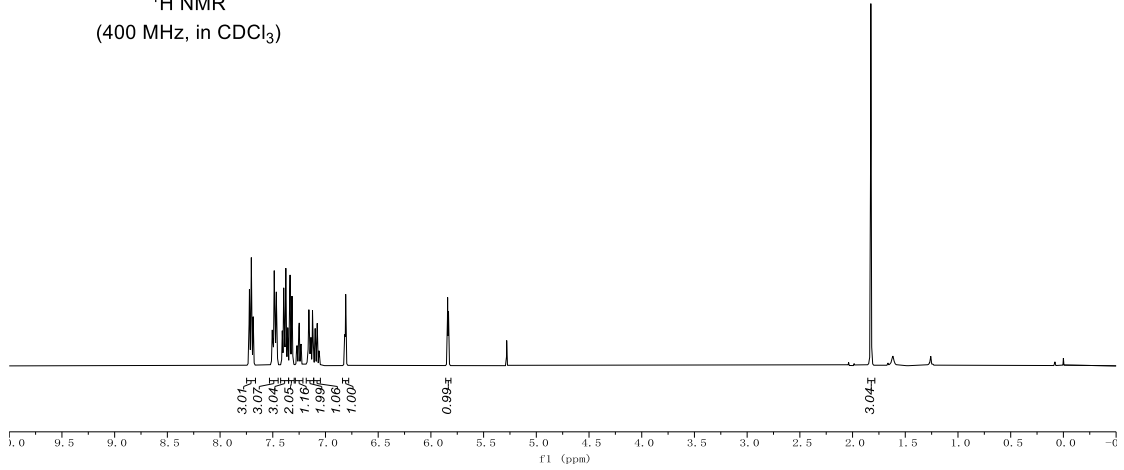

139.821  
139.355  
135.036  
132.819  
131.219  
129.217  
128.824  
127.794  
127.747  
127.343  
127.071  
125.687  
124.152  
121.851  
115.391  
117.079  
708.664

77.317  
76.989  
76.680

10.973

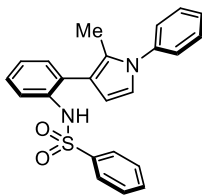

**3ab**

<sup>13</sup>C NMR

(100 MHz, in CDCl<sub>3</sub>)

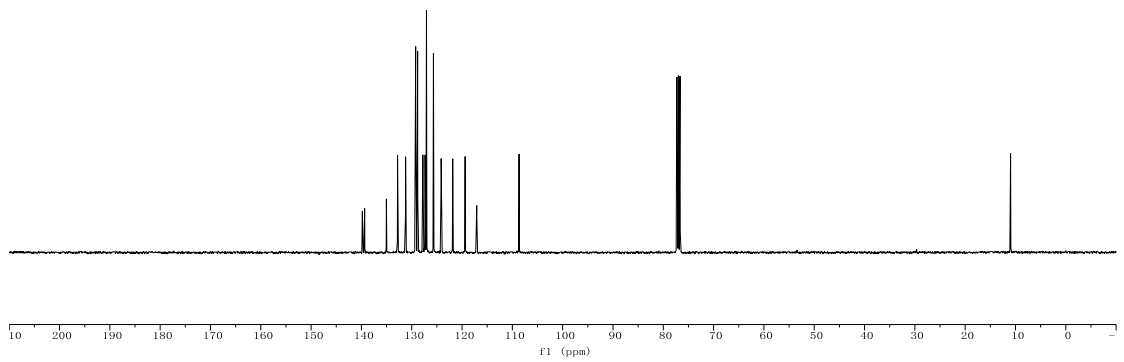

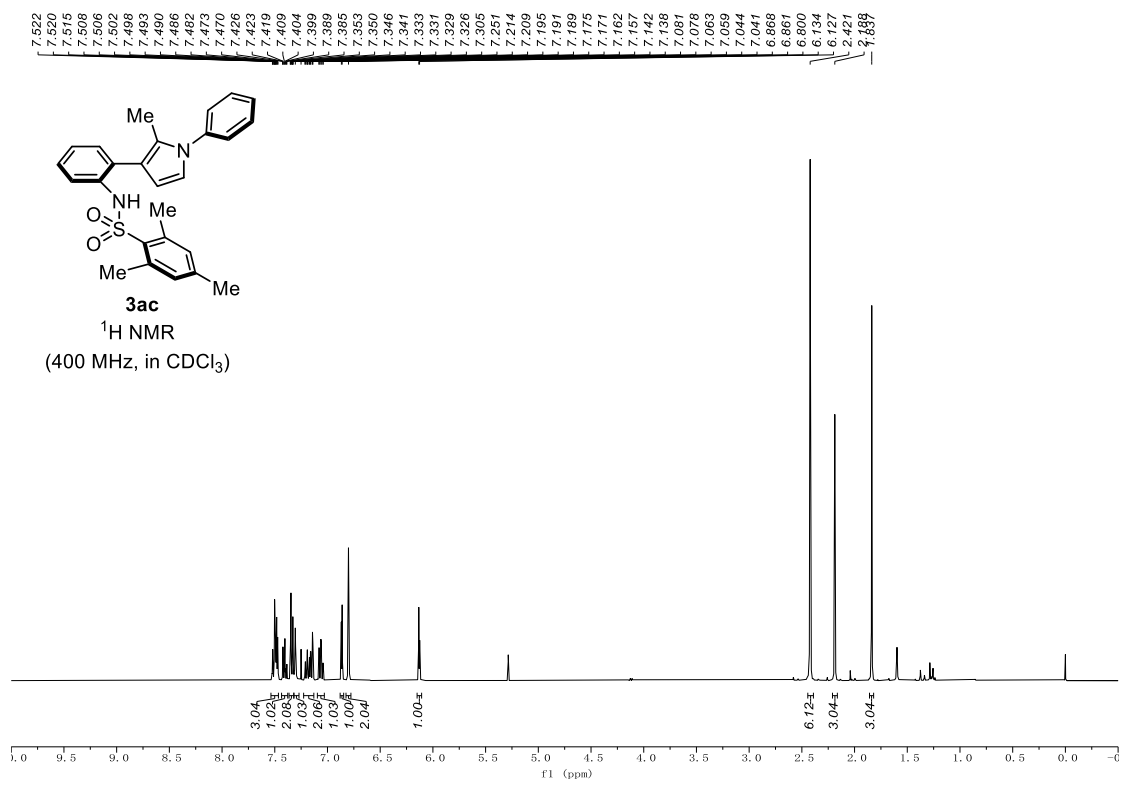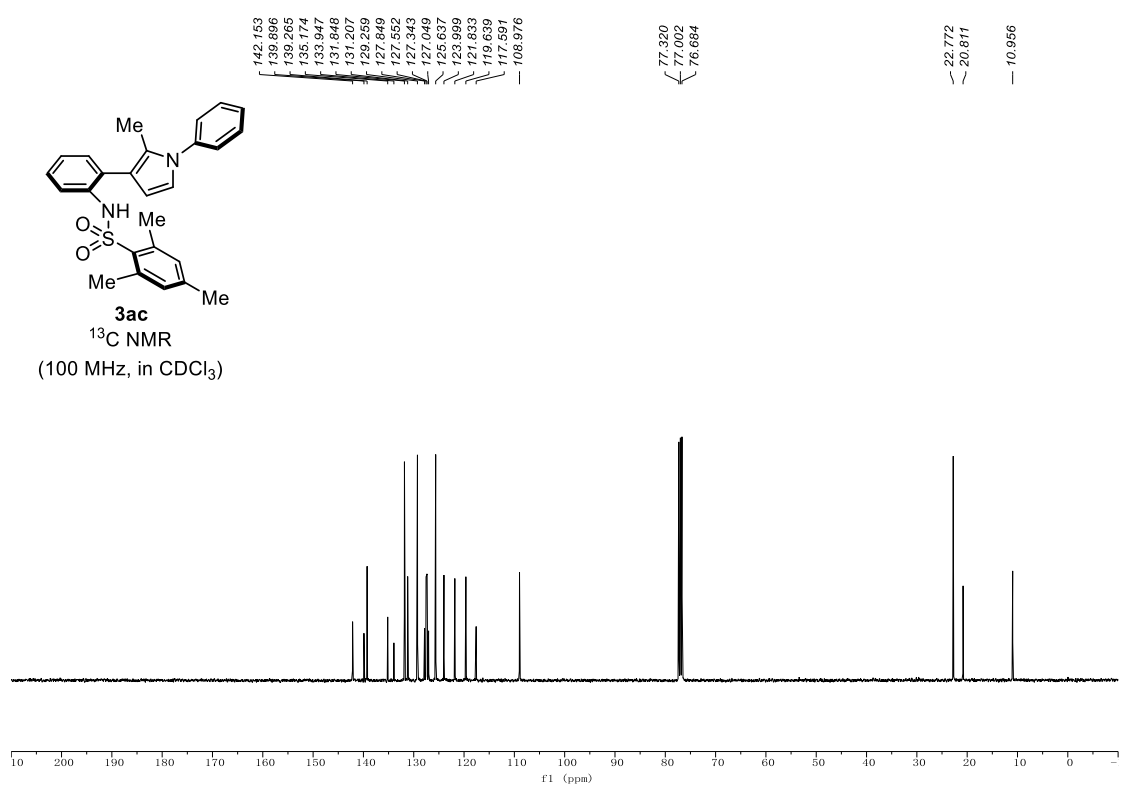



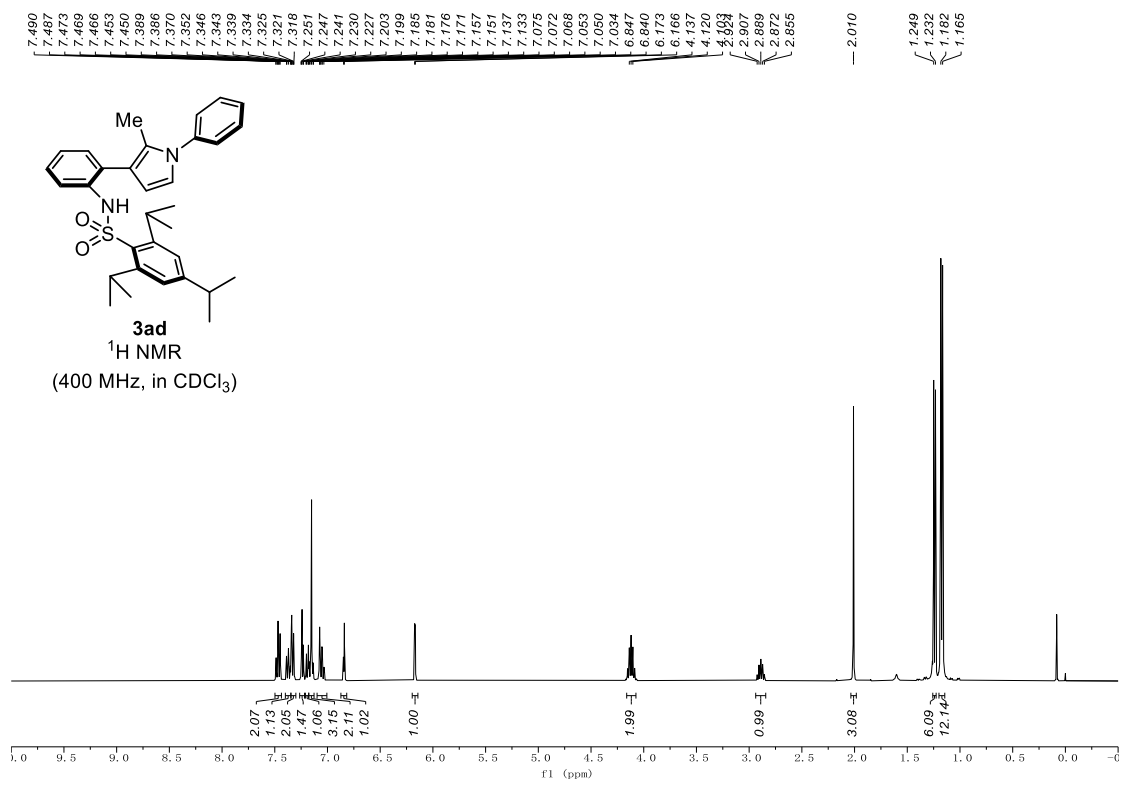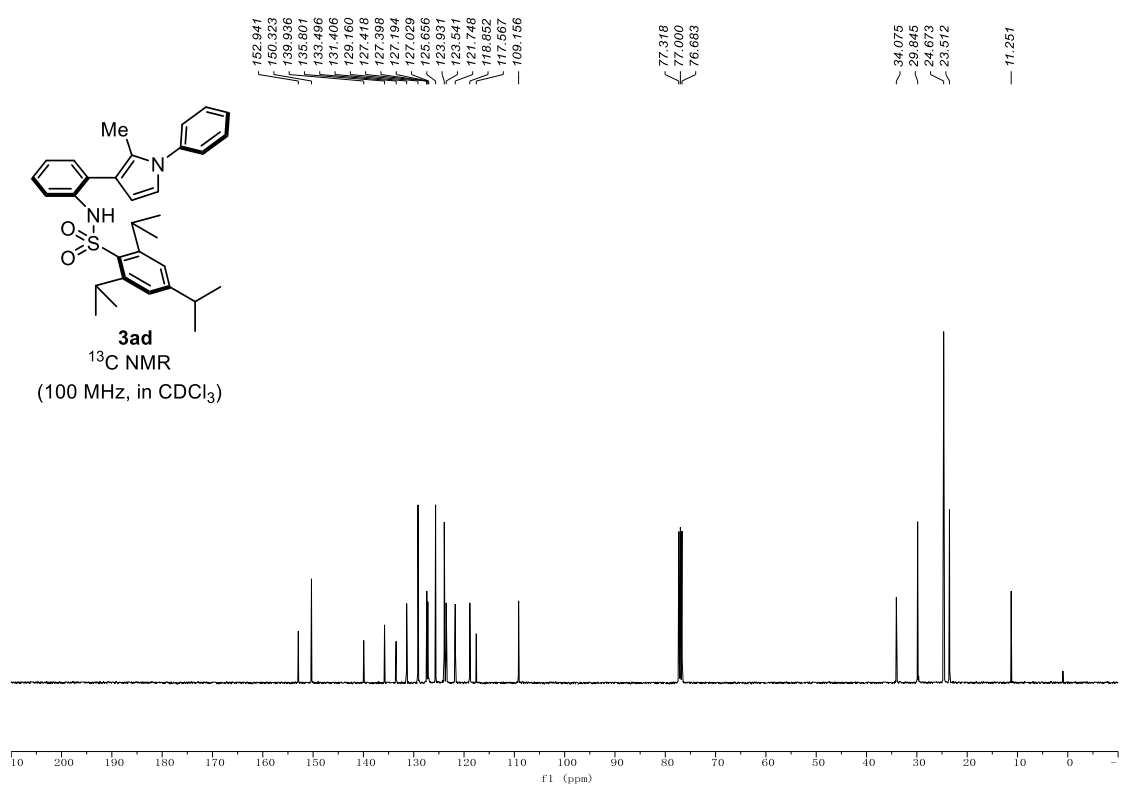

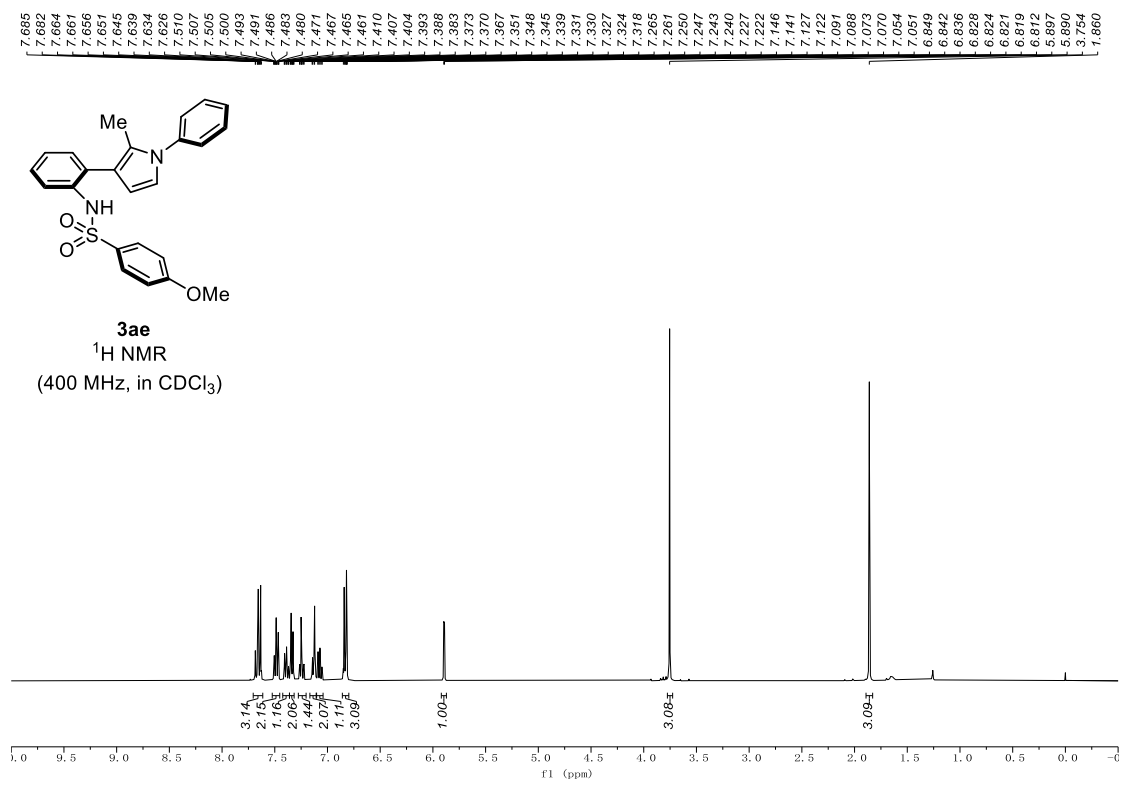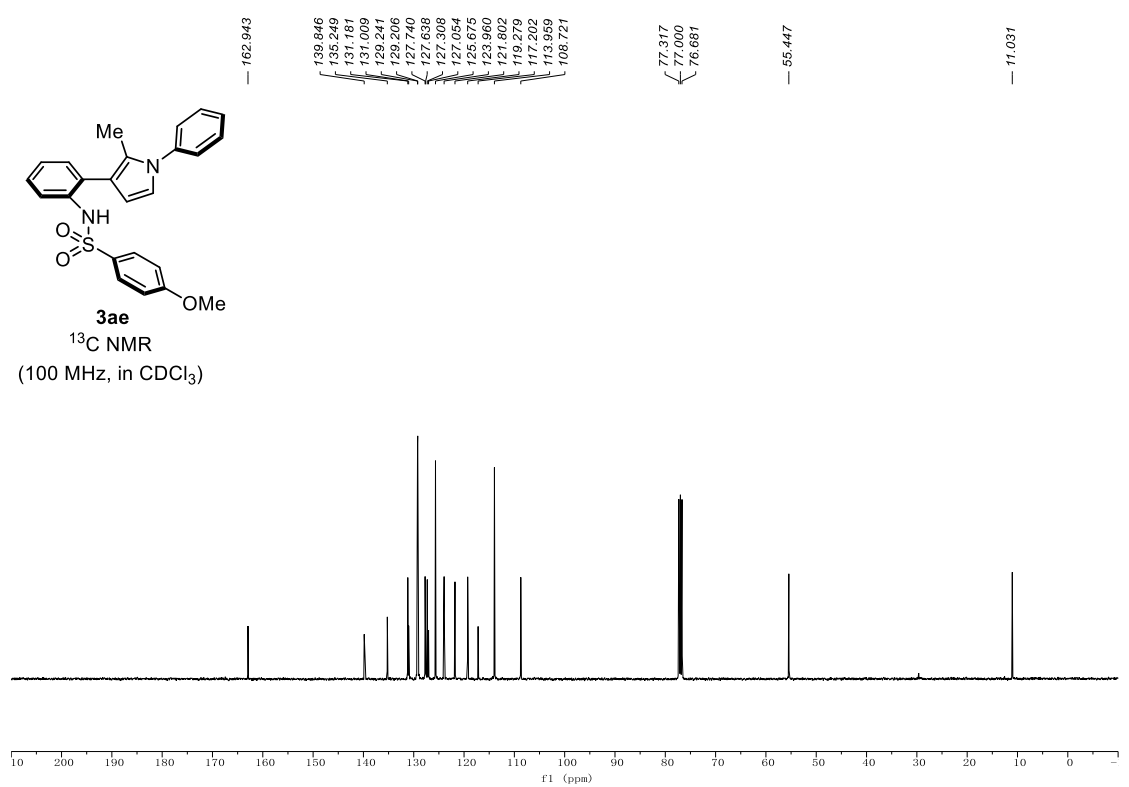

7.898  
7.893  
7.879  
7.874  
7.860  
7.856  
7.874  
7.572  
7.554  
7.551  
7.525  
7.521  
7.519  
7.505  
7.500  
7.496  
7.488  
7.488  
7.485  
7.481  
7.475  
7.467  
7.465  
7.462  
7.456  
7.448  
7.444  
7.444  
7.425  
7.422  
7.418  
7.408  
7.403  
7.398  
7.392  
7.388  
7.383  
7.382  
7.374  
7.371  
7.366  
7.362  
7.346  
7.316  
7.311  
7.208  
7.205  
7.197  
7.193  
7.189  
7.186  
7.177  
7.173  
7.169  
7.167  
7.158  
7.154  
7.077  
7.074  
7.059  
7.055  
7.040  
7.037  
7.020  
7.016  
7.013  
6.995  
6.992  
6.976  
6.959  
6.944  
6.104  
1.907

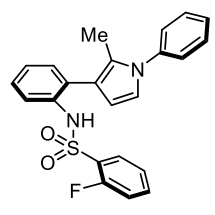

**3af**  
<sup>1</sup>H NMR  
(400 MHz, in CDCl<sub>3</sub>)

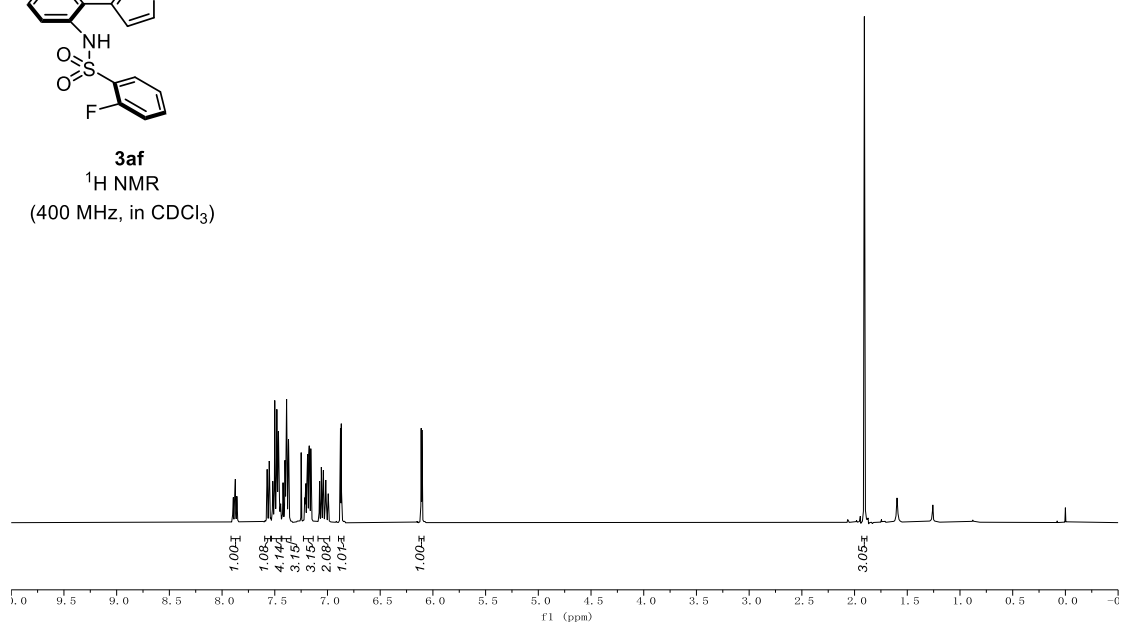

160.150  
157.589  
139.958  
135.226  
135.142  
134.660  
131.301  
130.941  
129.220  
127.683  
127.498  
127.357  
127.270  
127.137  
127.026  
125.829  
124.199  
124.161  
124.003  
122.024  
118.467  
117.036  
117.014  
116.603  
108.024  
77.317  
76.389  
76.061  
11.012

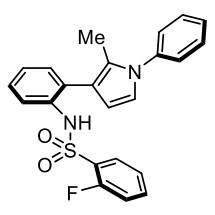

**3af**  
<sup>13</sup>C NMR  
(100 MHz, in CDCl<sub>3</sub>)

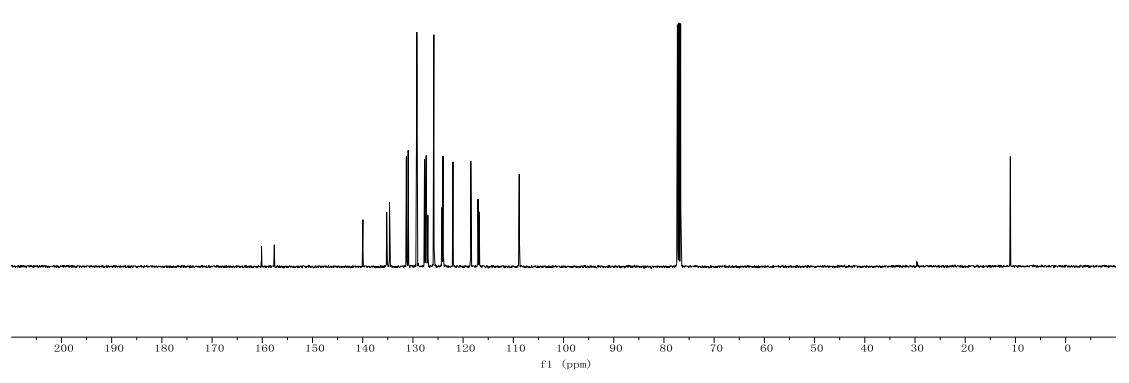

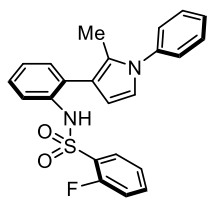

**3af**  
<sup>19</sup>F NMR  
 (376 MHz, in CDCl<sub>3</sub>)

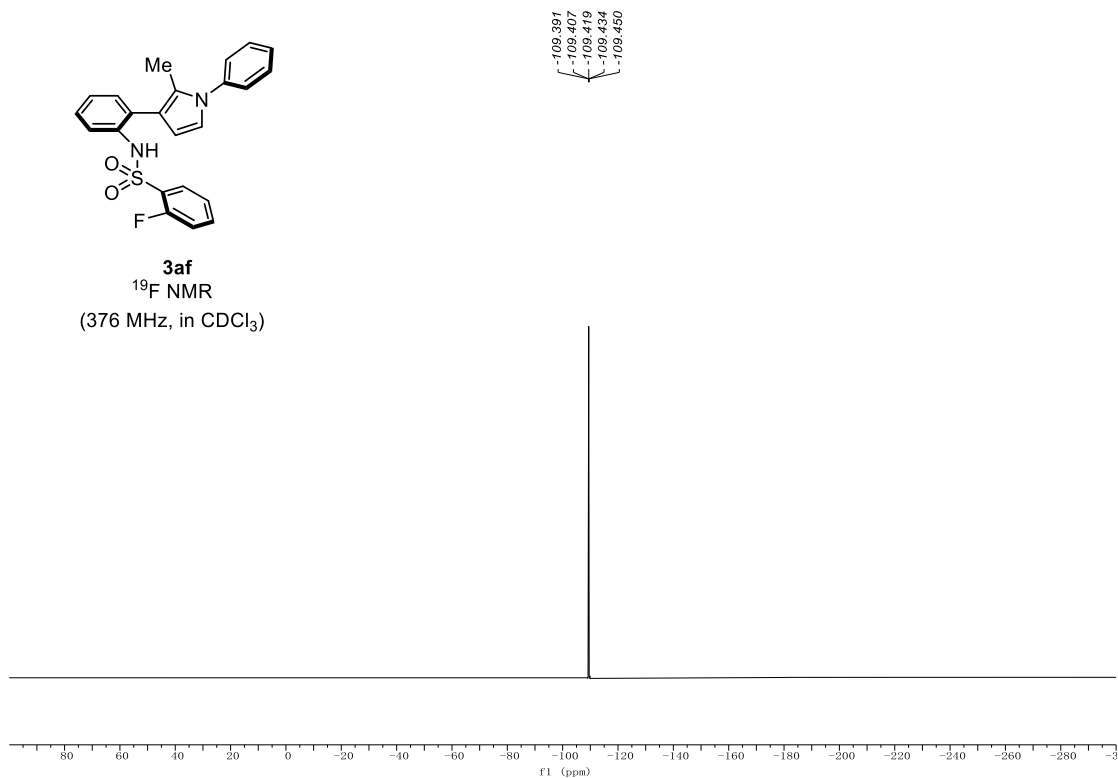

7.665  
 7.663  
 7.649  
 7.645  
 7.510  
 7.508  
 7.504  
 7.496  
 7.494  
 7.490  
 7.486  
 7.484  
 7.474  
 7.471  
 7.469  
 7.418  
 7.415  
 7.412  
 7.402  
 7.396  
 7.391  
 7.381  
 7.378  
 7.376  
 7.372  
 7.367  
 7.359  
 7.358  
 7.355  
 7.352  
 7.347  
 7.333  
 7.330  
 7.328  
 7.326  
 7.312  
 7.308  
 7.306  
 7.302  
 7.287  
 7.283  
 7.255  
 7.185  
 7.182  
 7.166  
 7.163  
 7.148  
 7.144  
 6.929  
 6.890  
 6.883  
 6.202  
 6.185  
 2.074

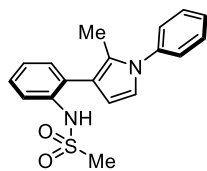

**3aj**  
<sup>1</sup>H NMR  
 (400 MHz, in CDCl<sub>3</sub>)

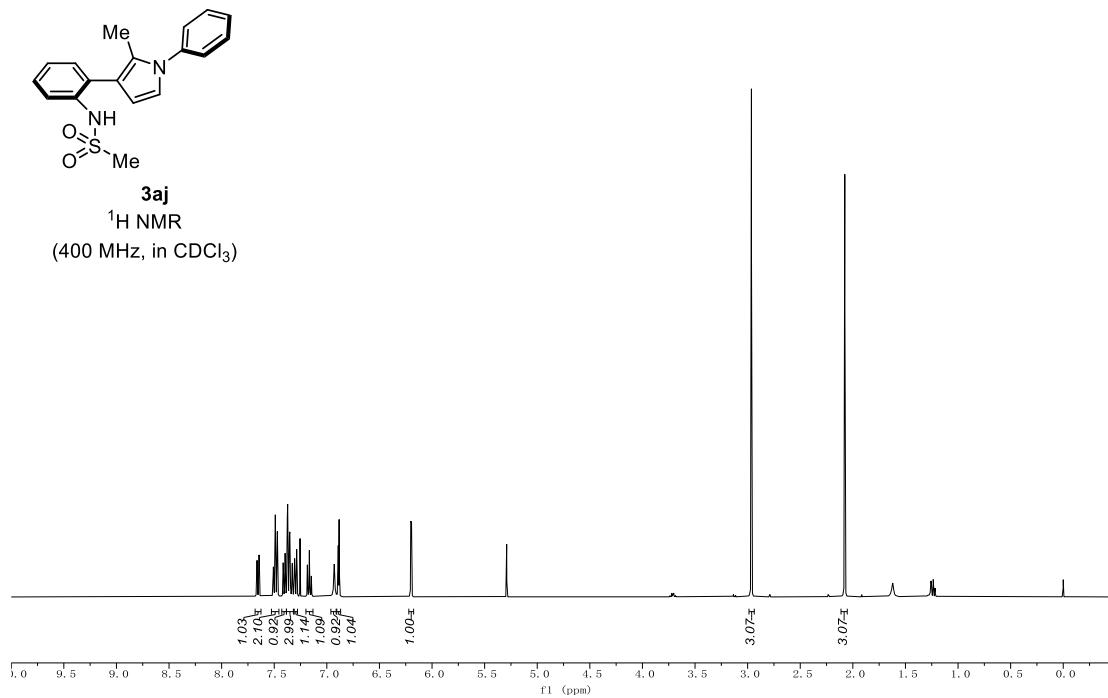

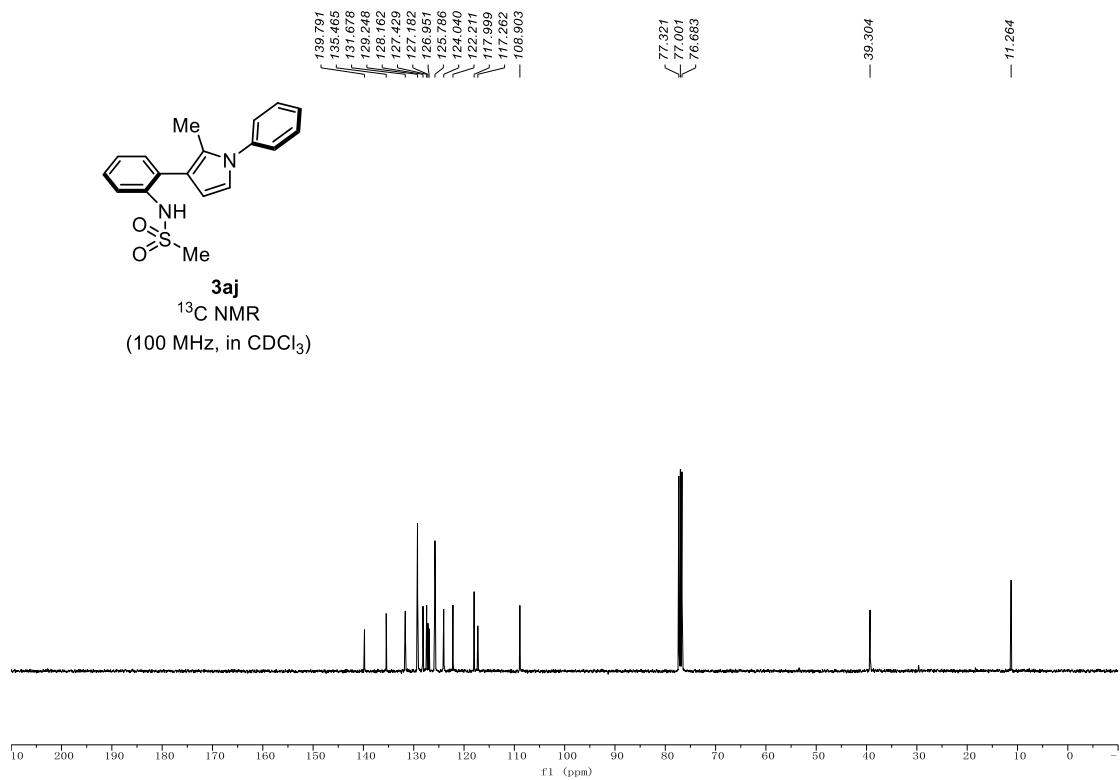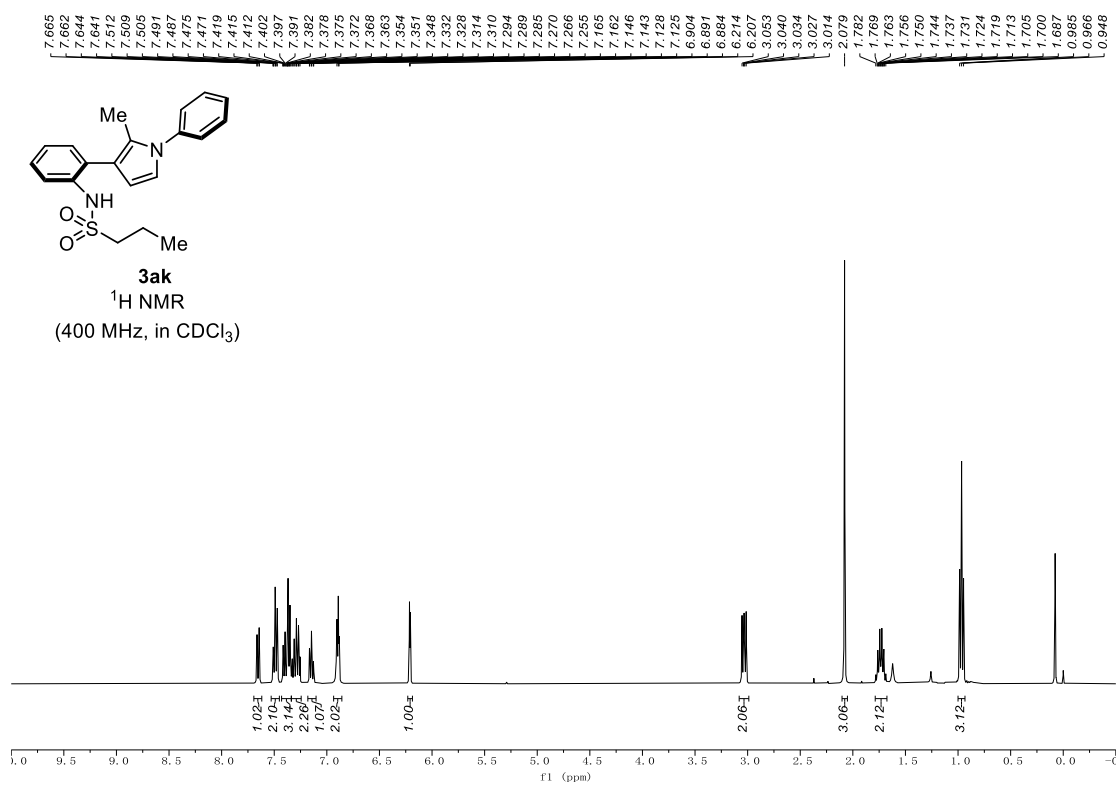

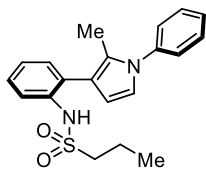

**3ak**  
 $^{13}\text{C}$  NMR  
 (100 MHz, in  $\text{CDCl}_3$ )

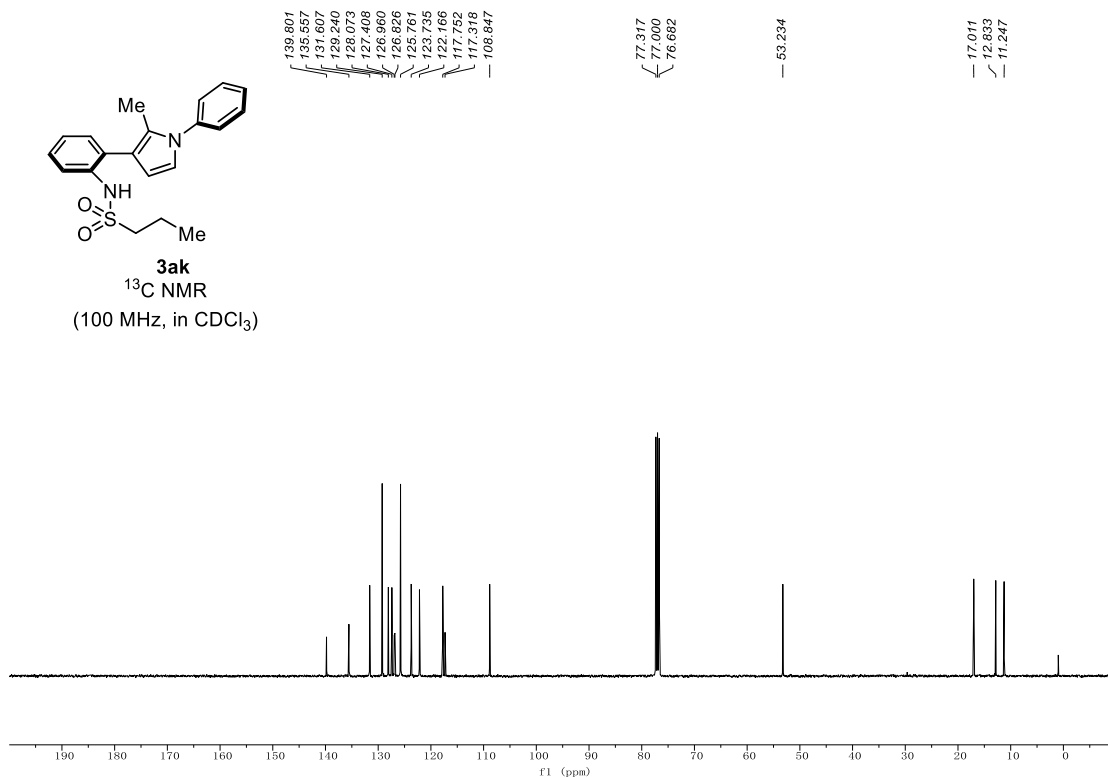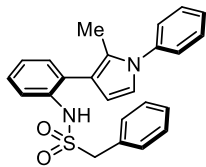

**3al**  
 $^1\text{H}$  NMR  
 (400 MHz, in  $\text{CDCl}_3$ )

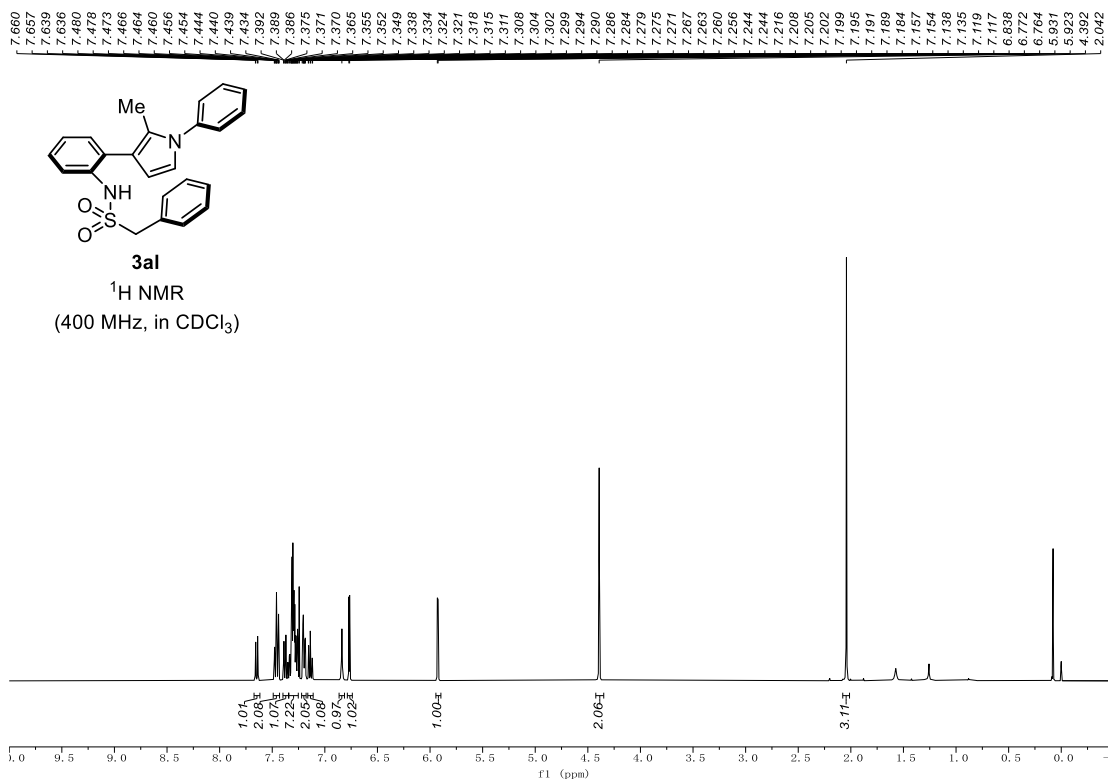

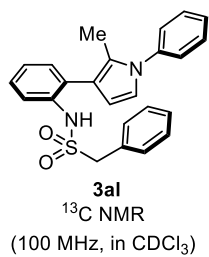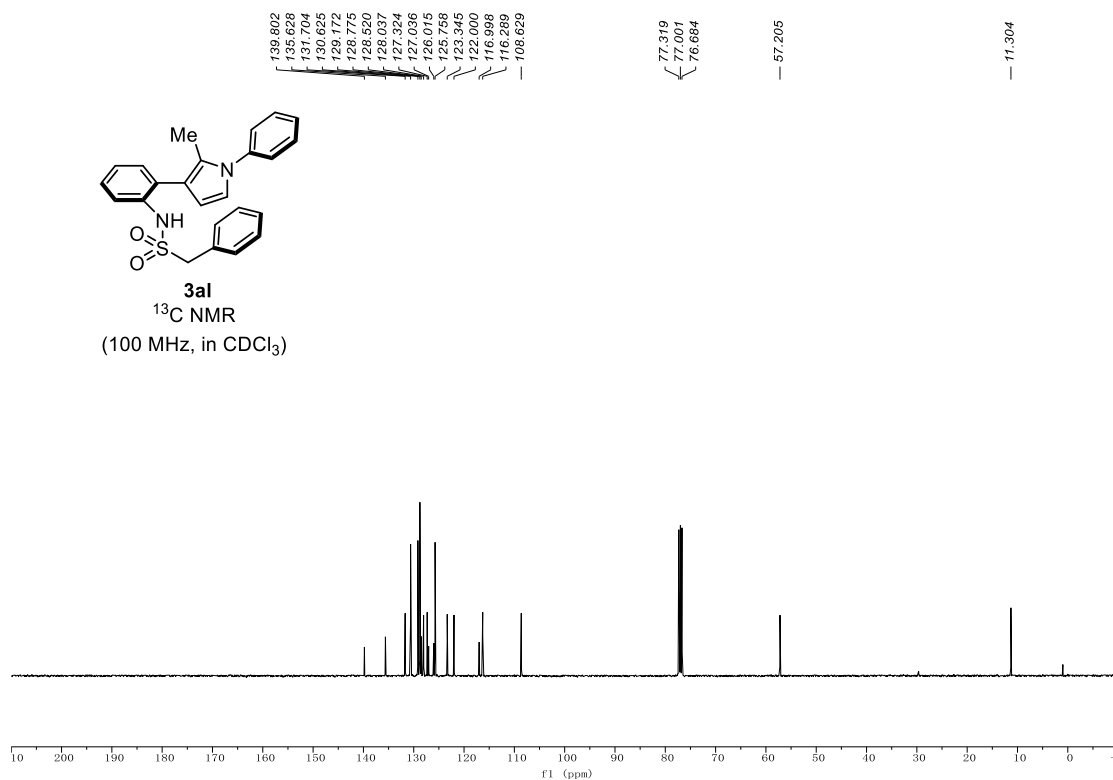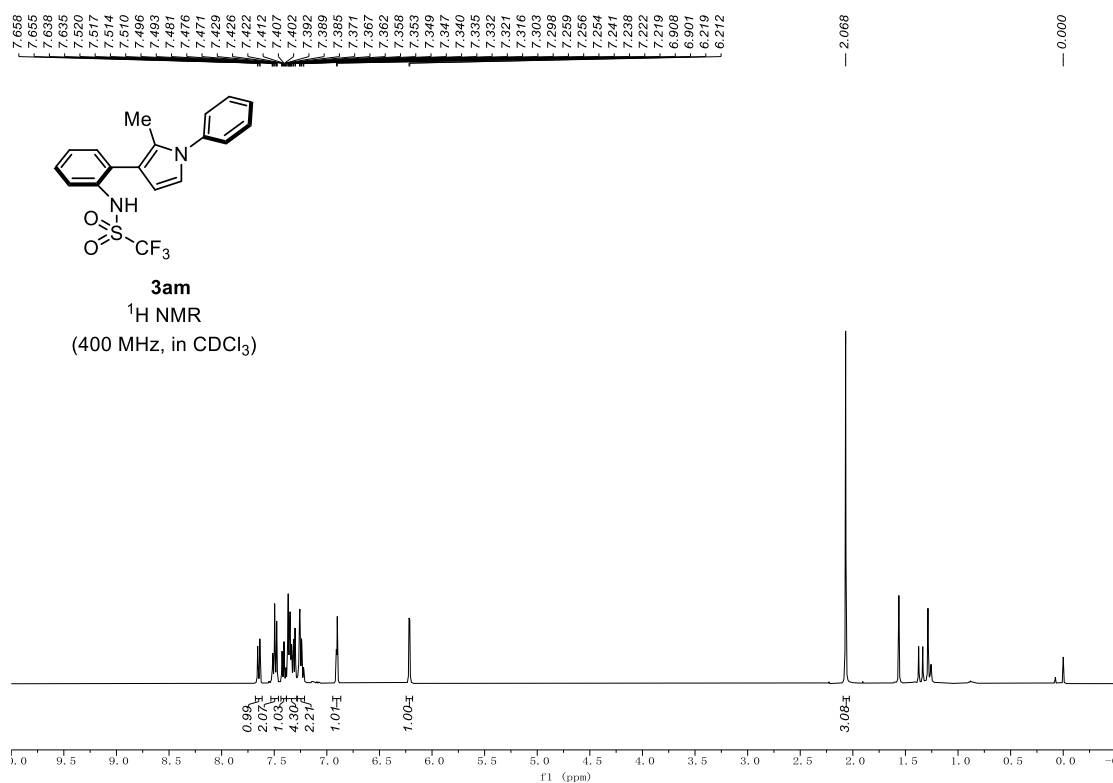

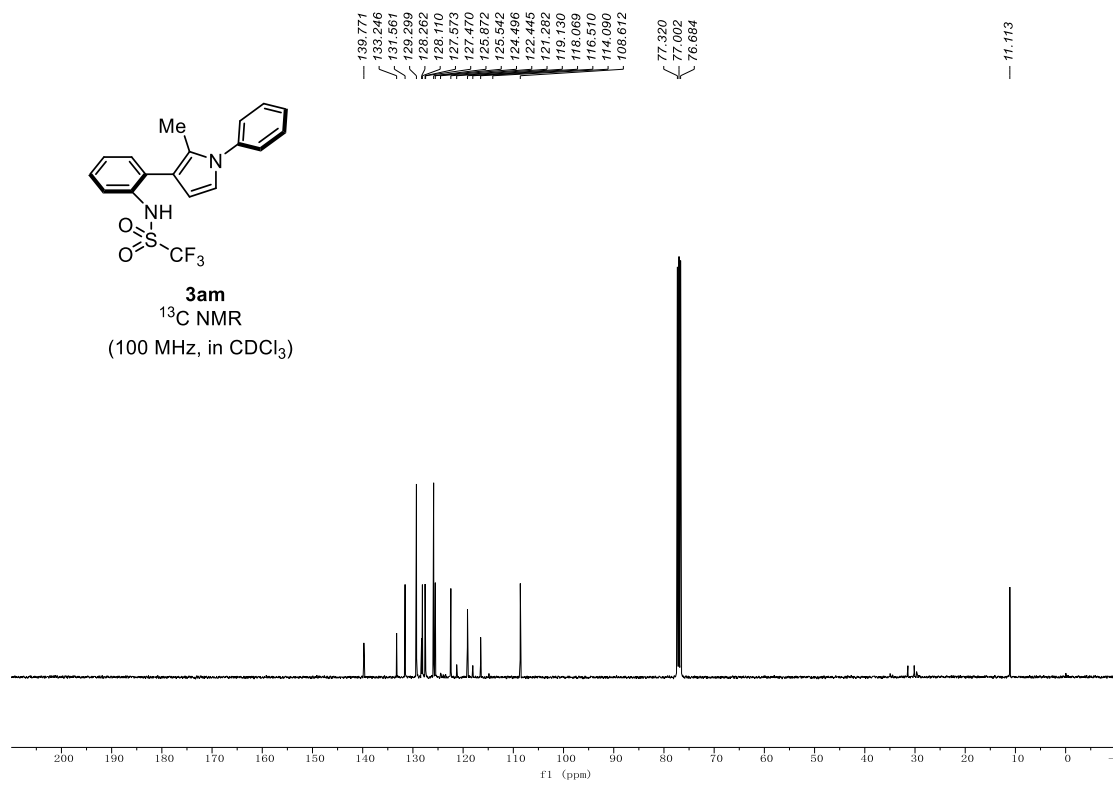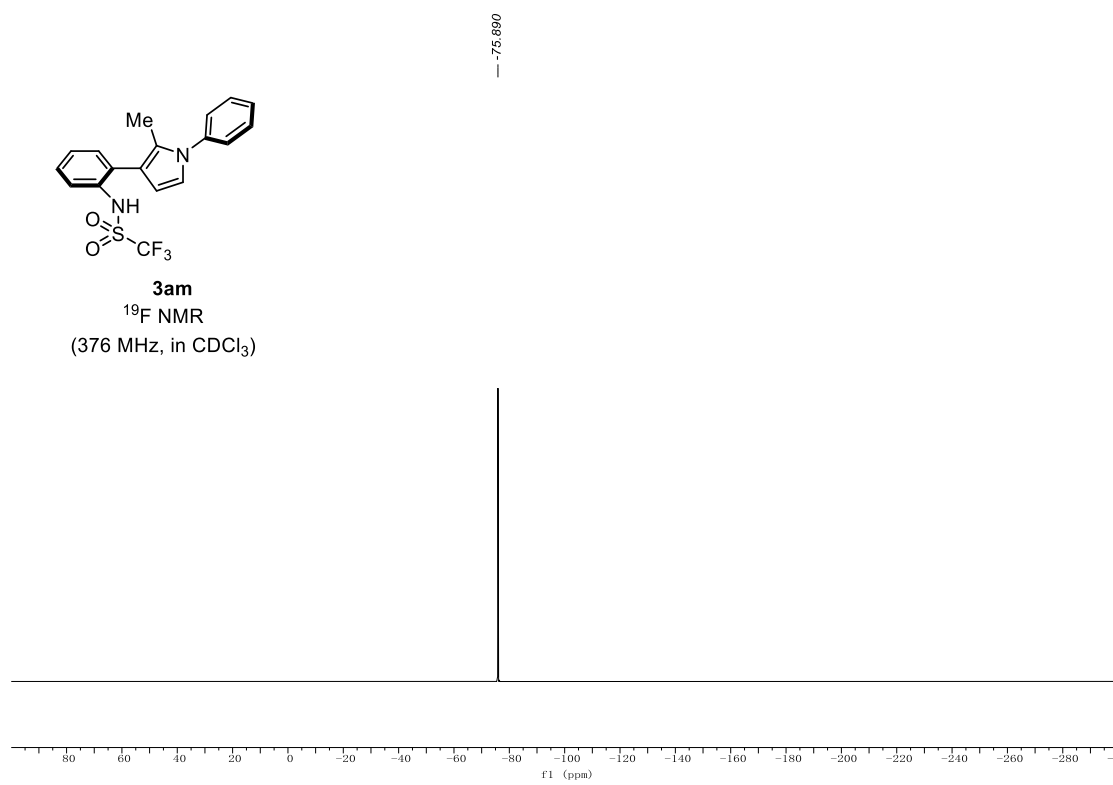



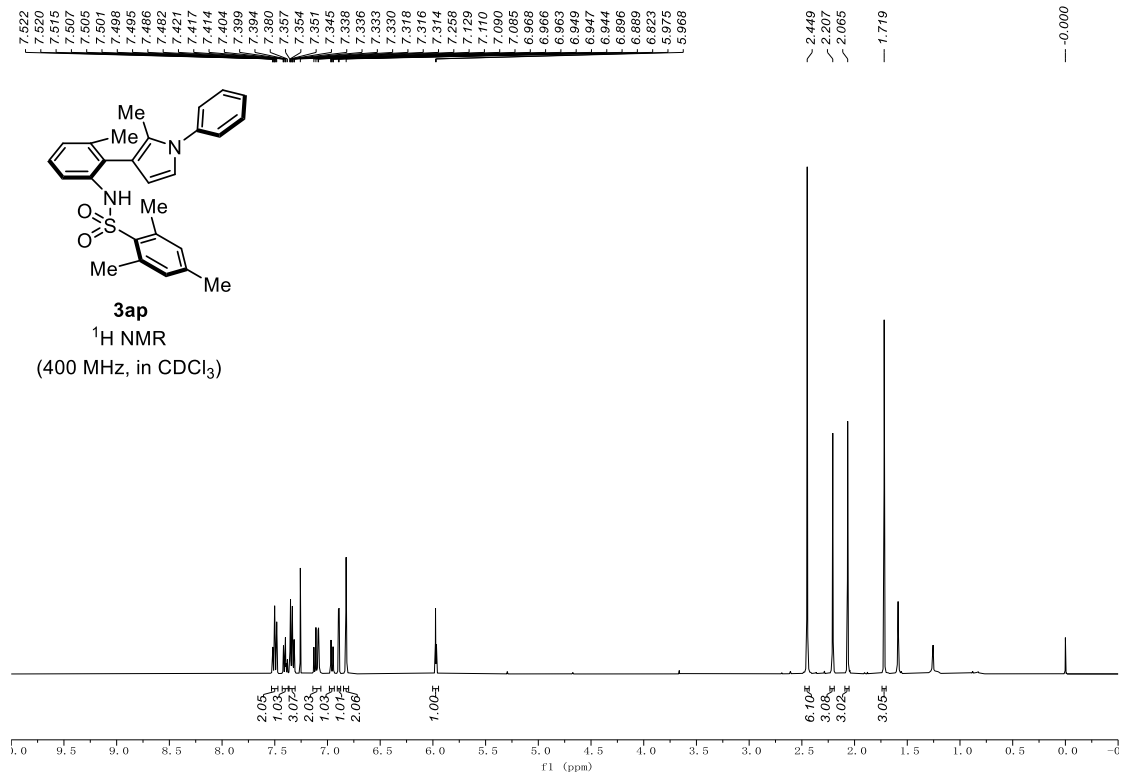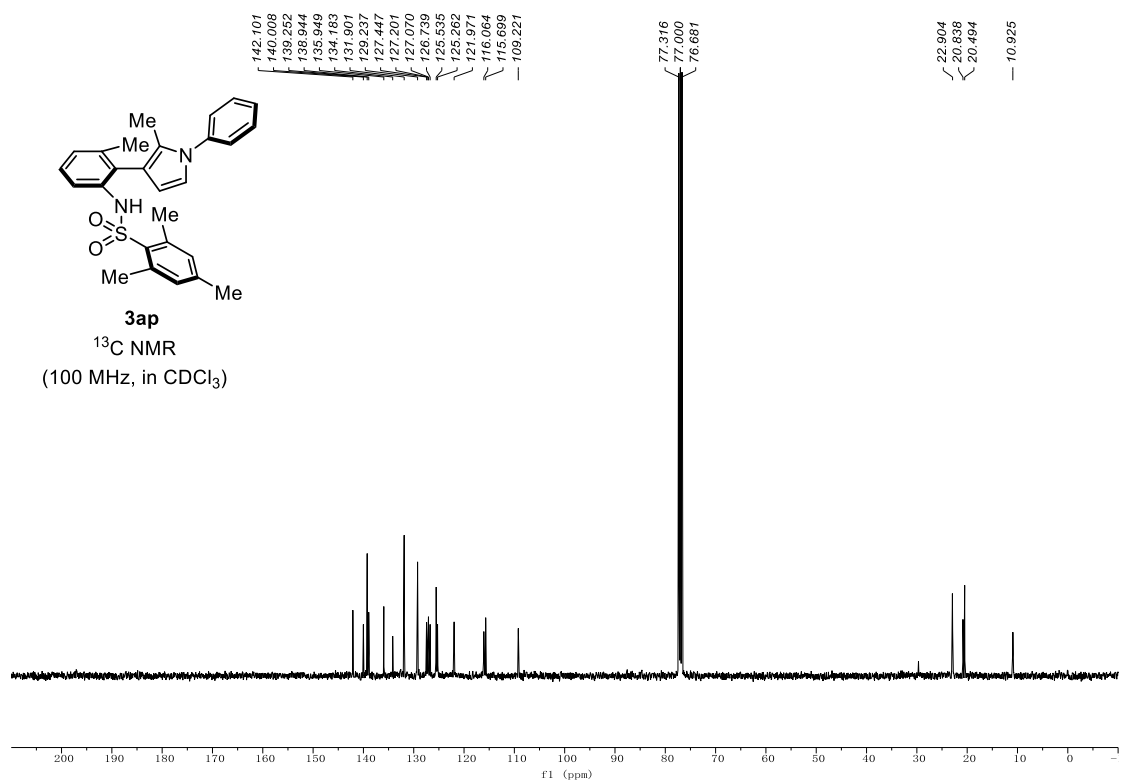

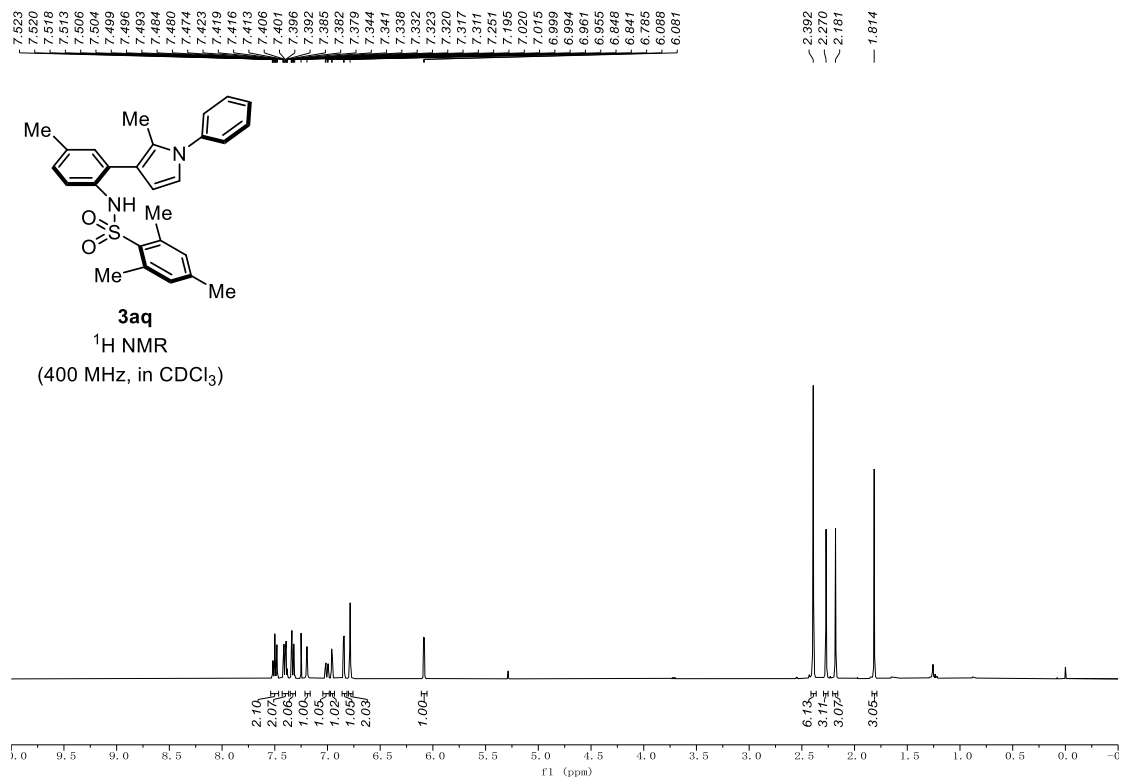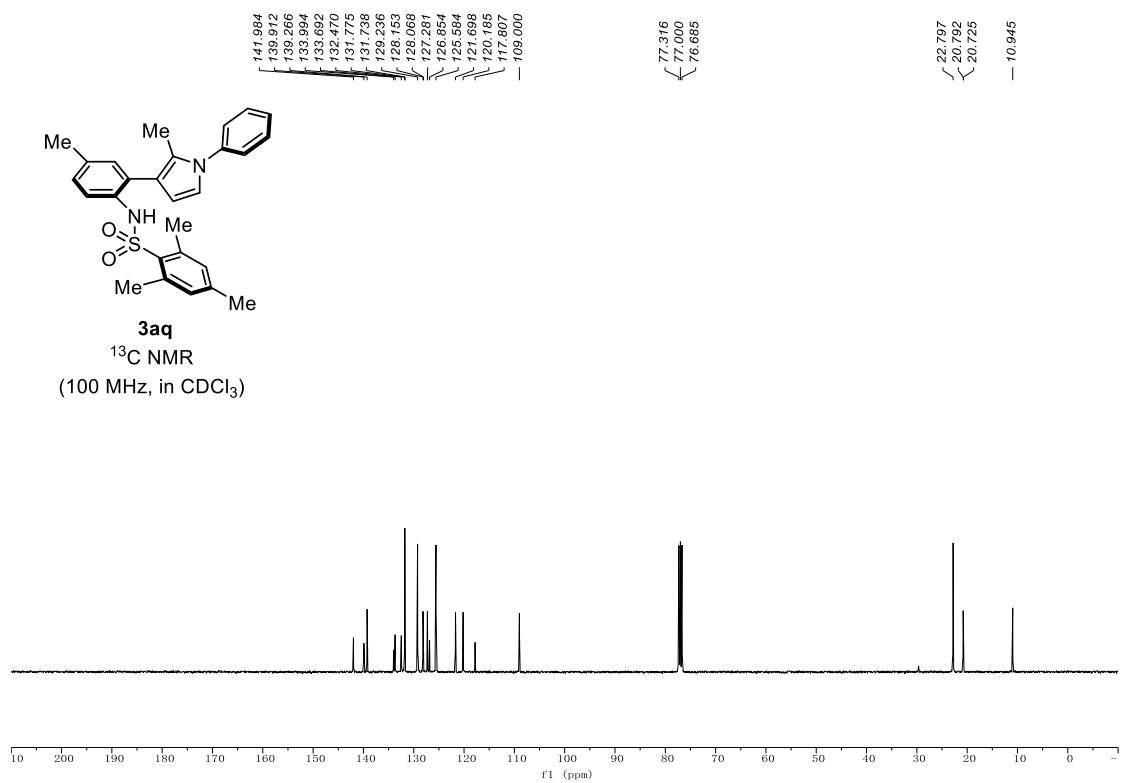

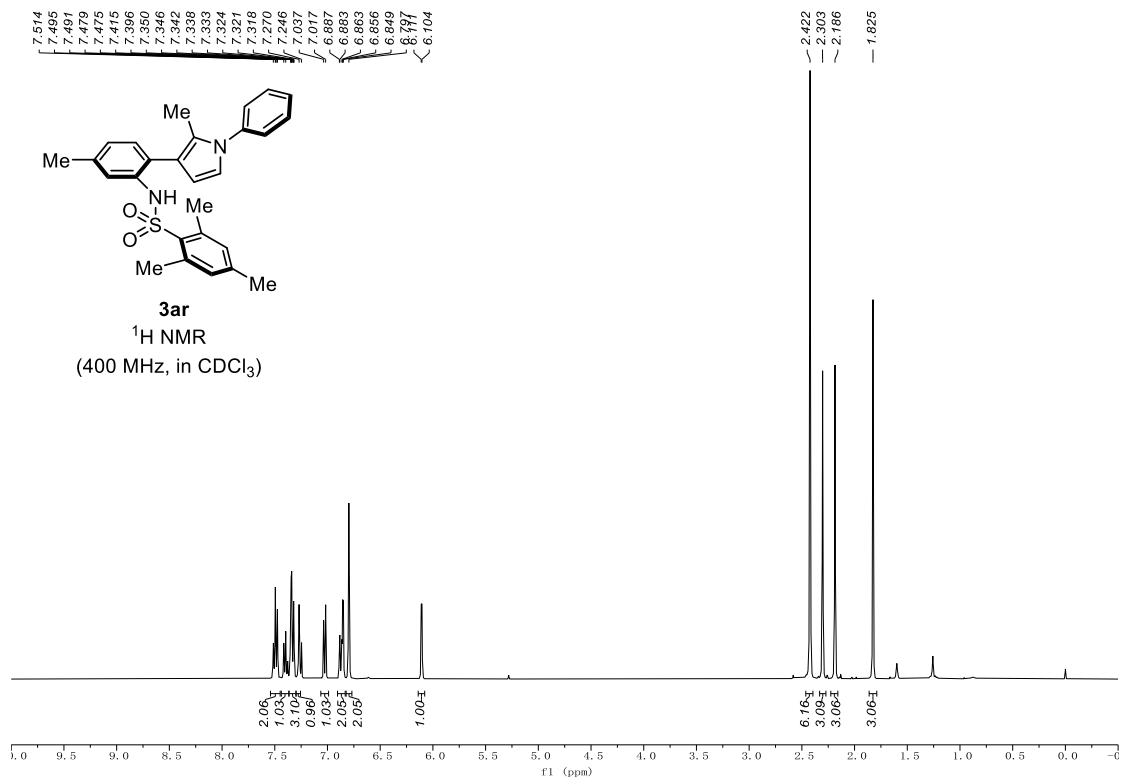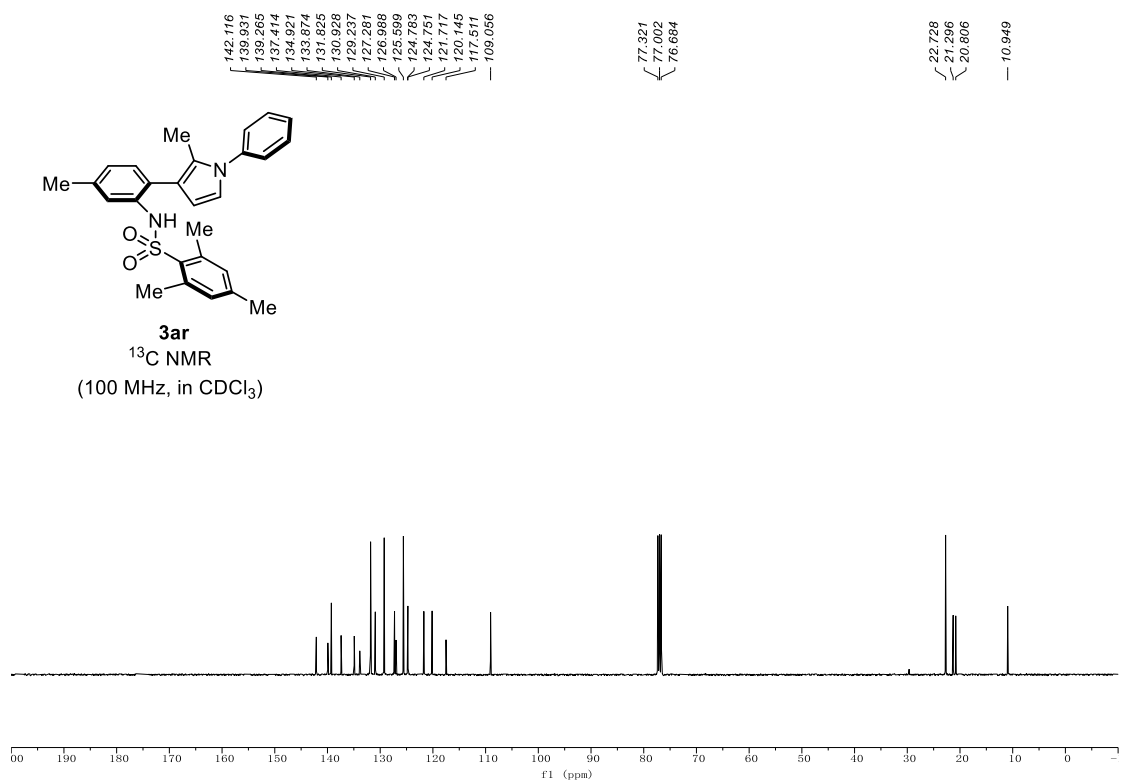

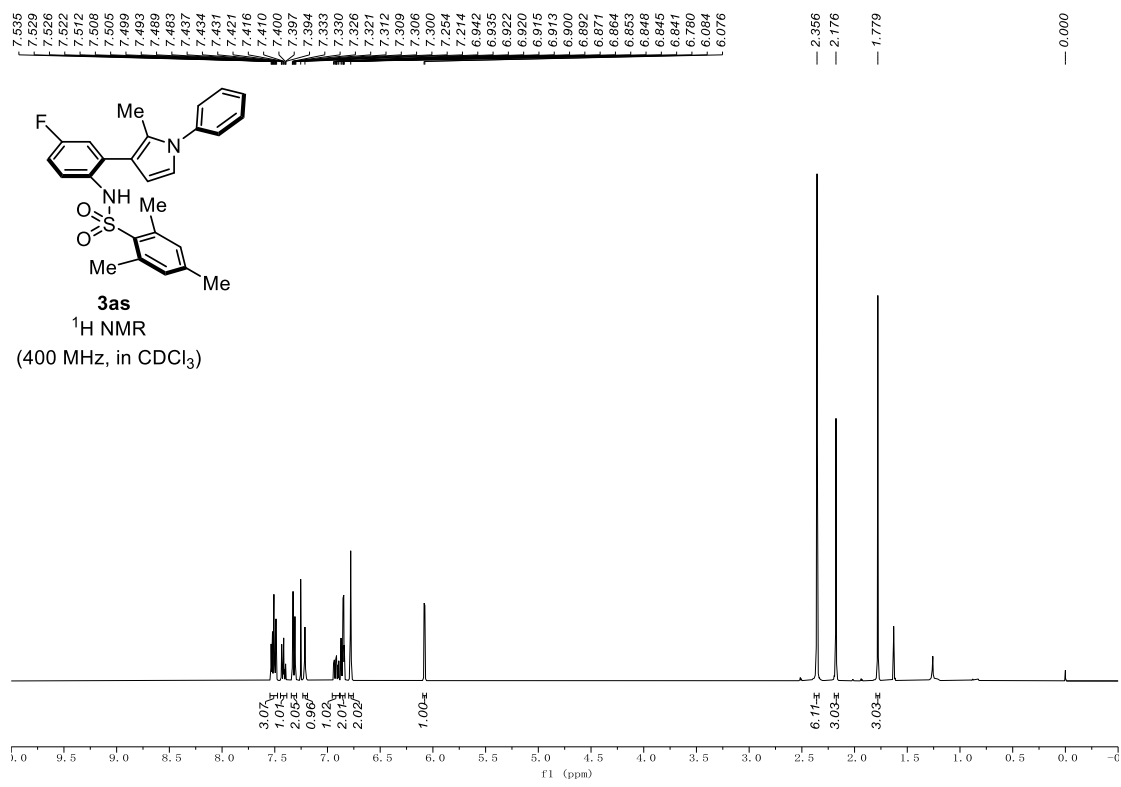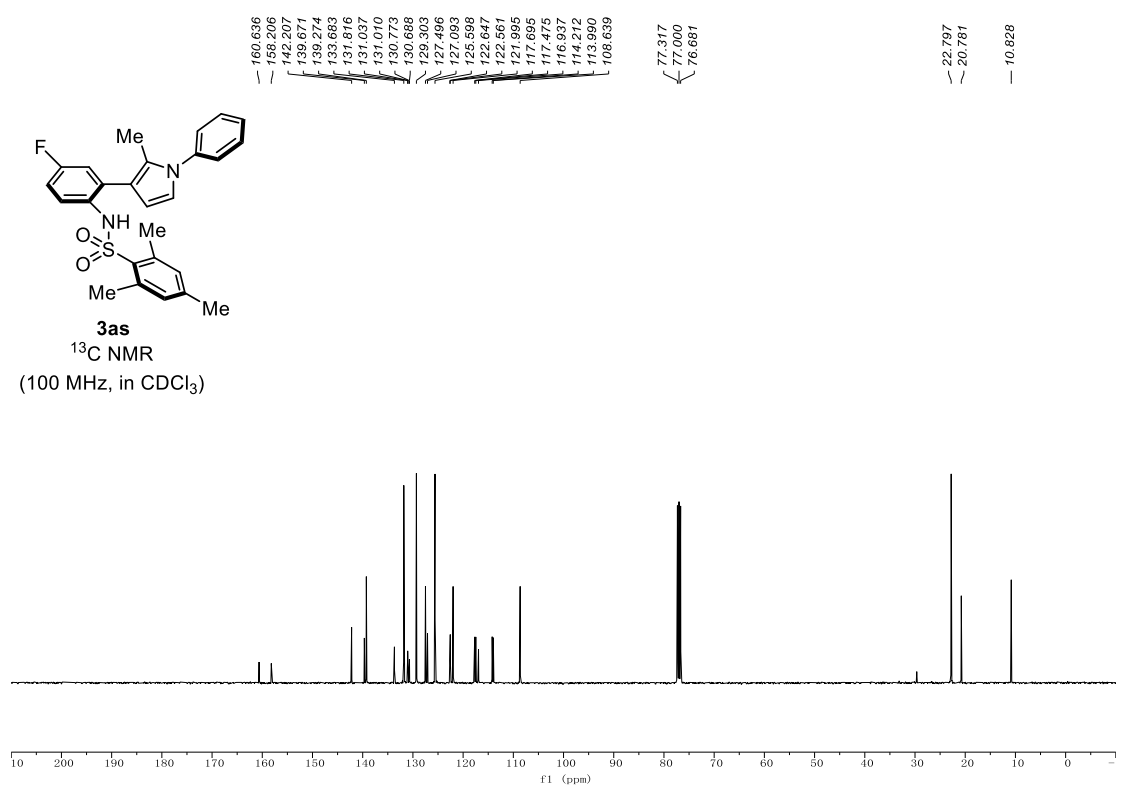

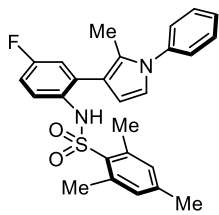

**3as**

<sup>19</sup>F NMR

(376 MHz, in CDCl<sub>3</sub>)

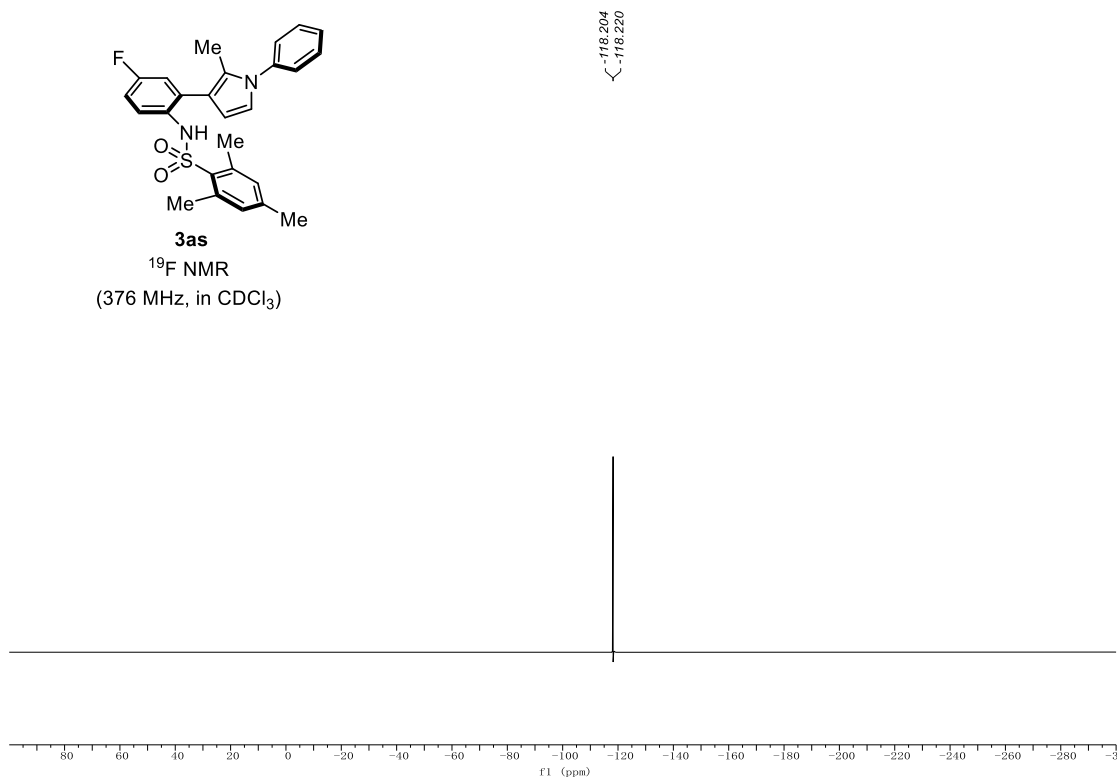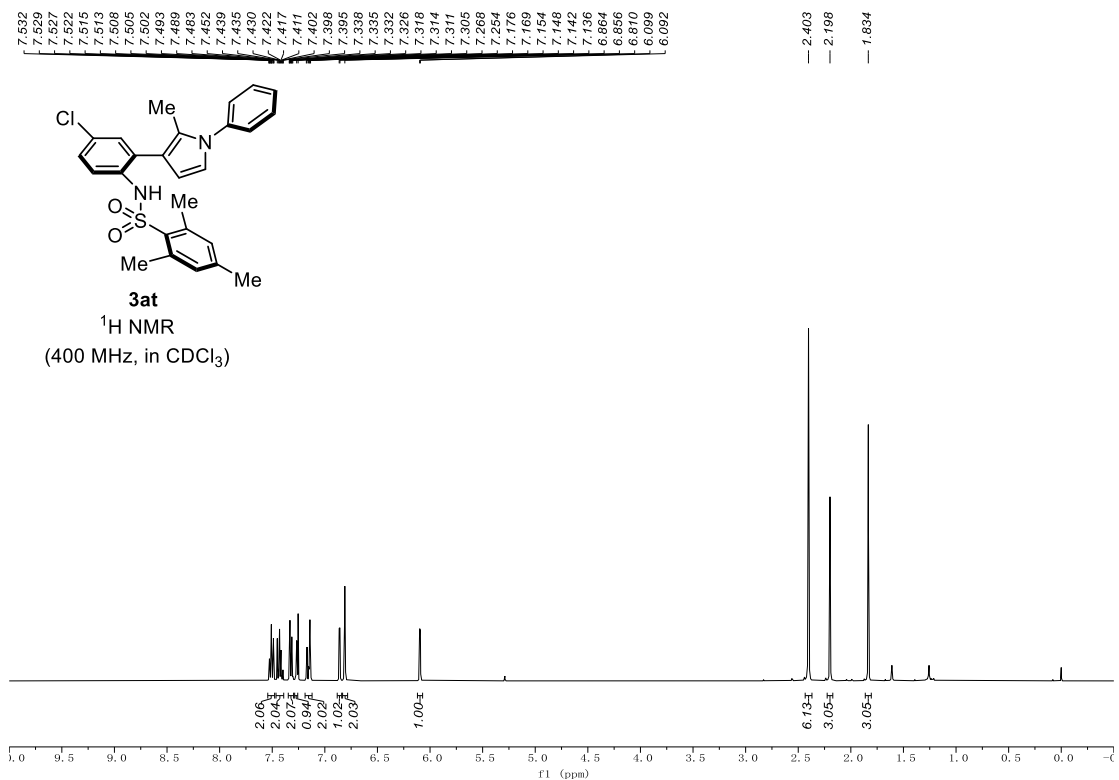

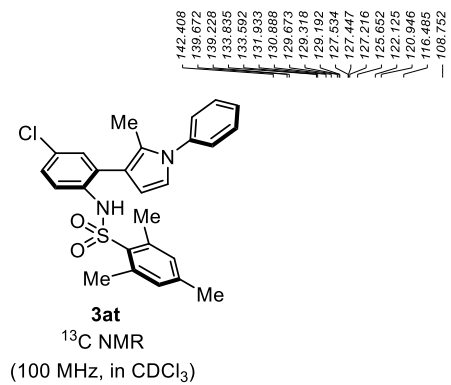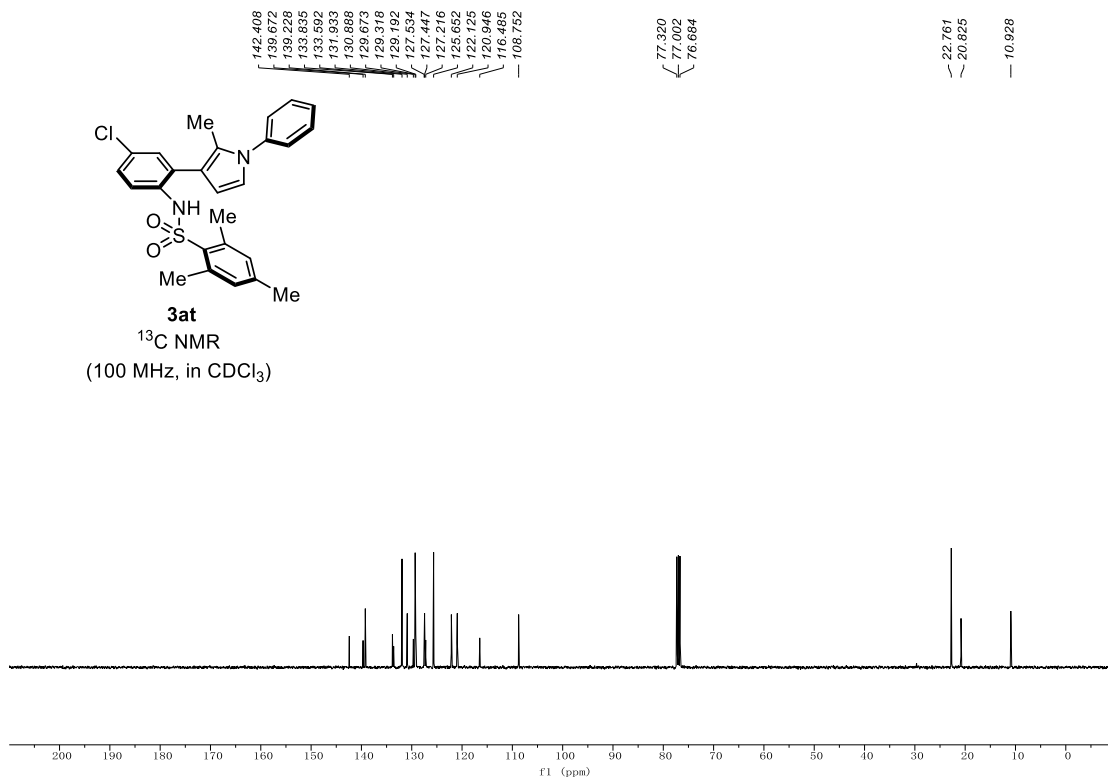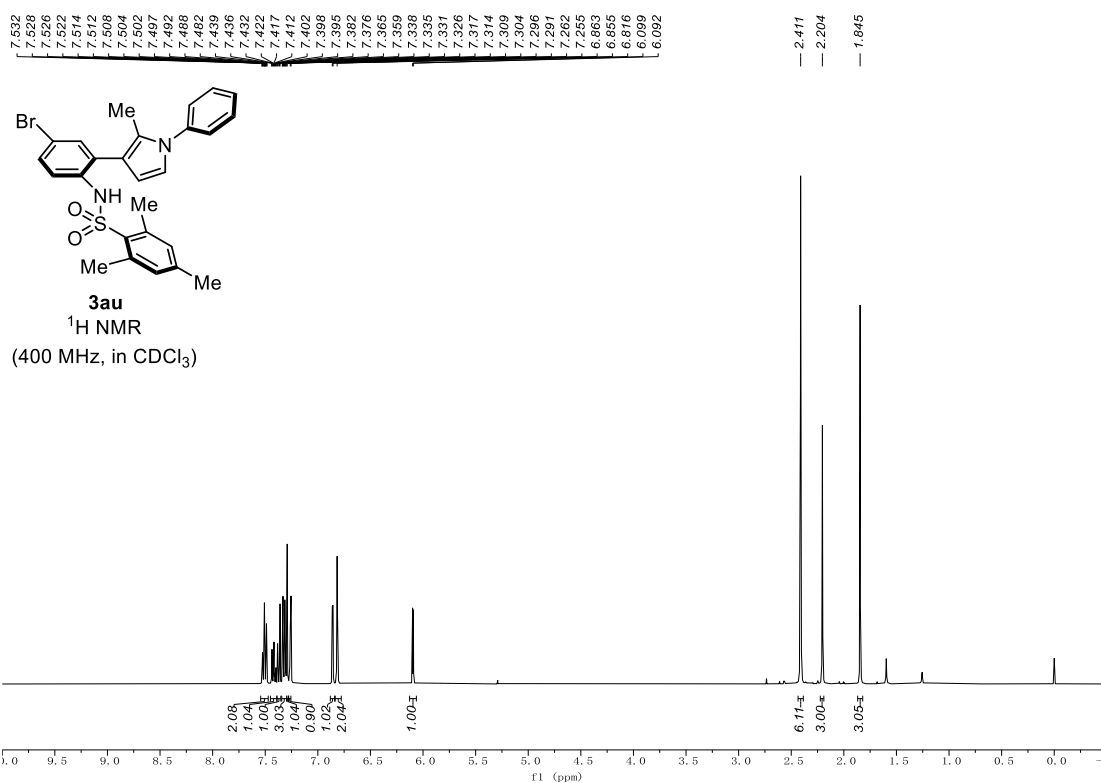

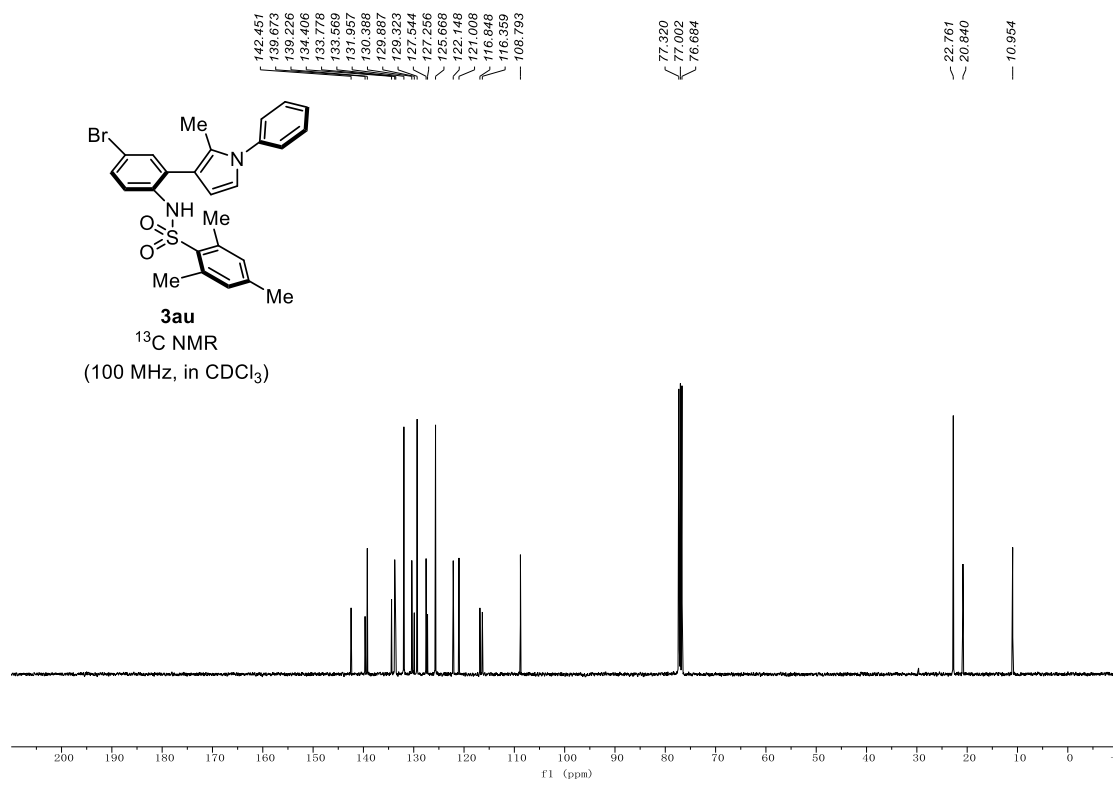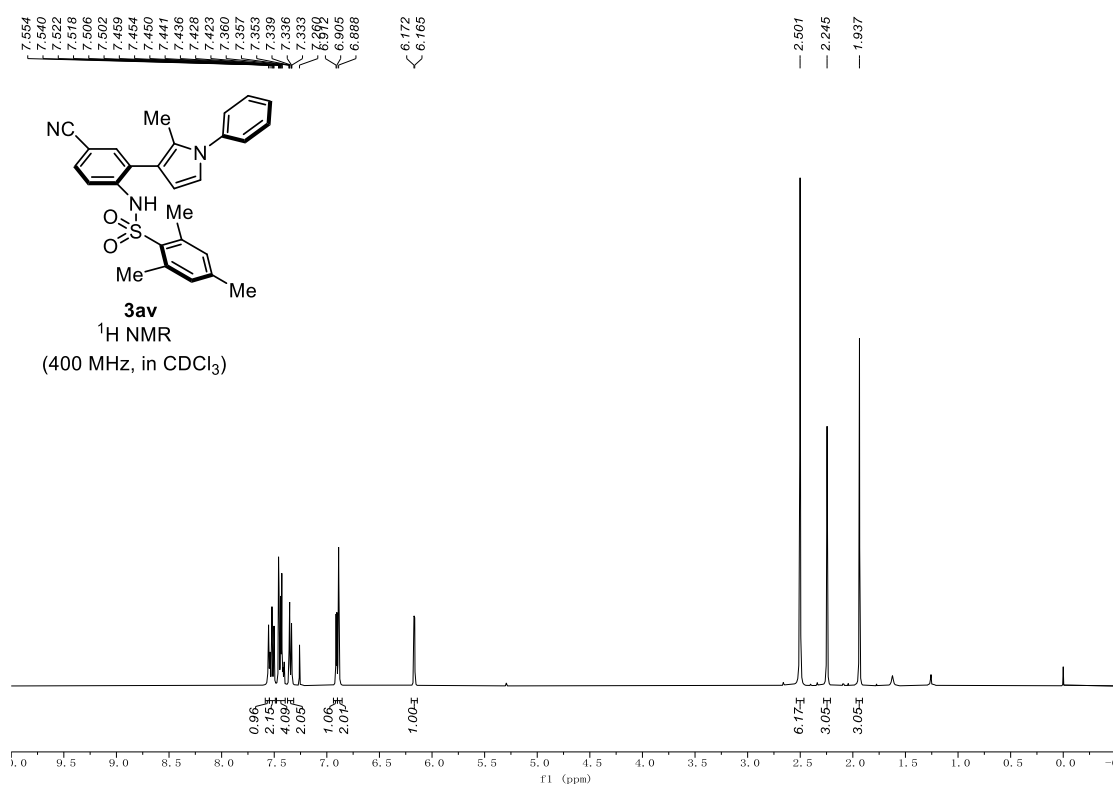

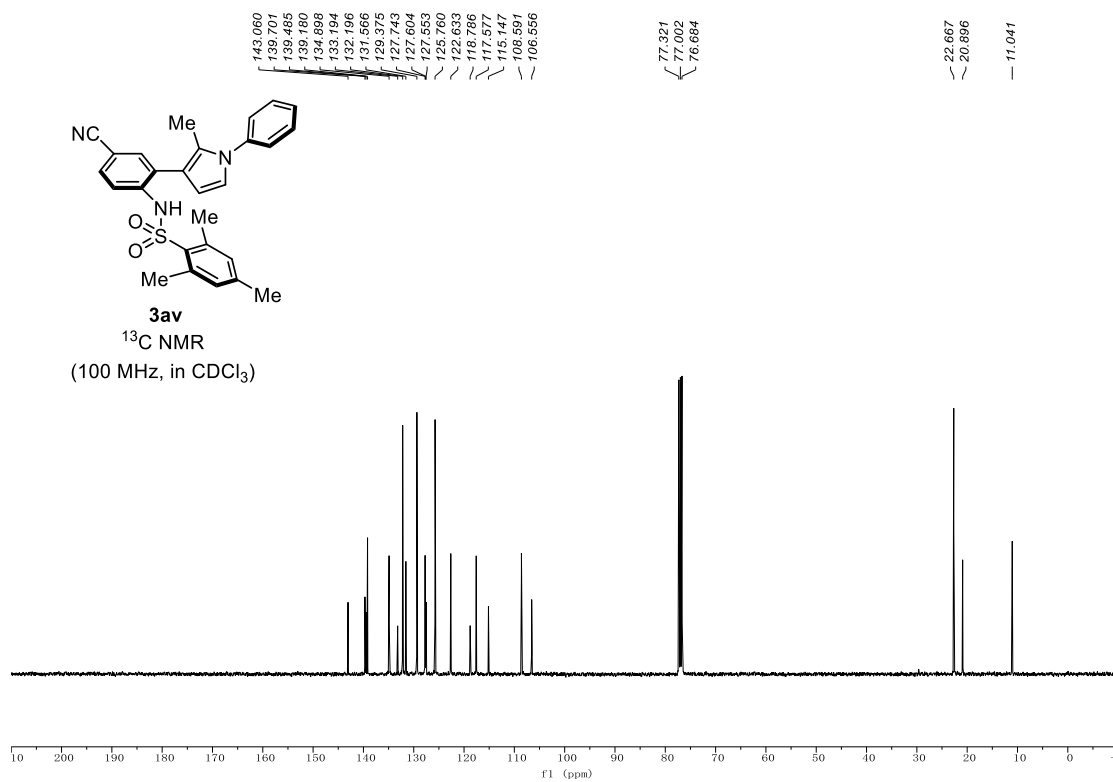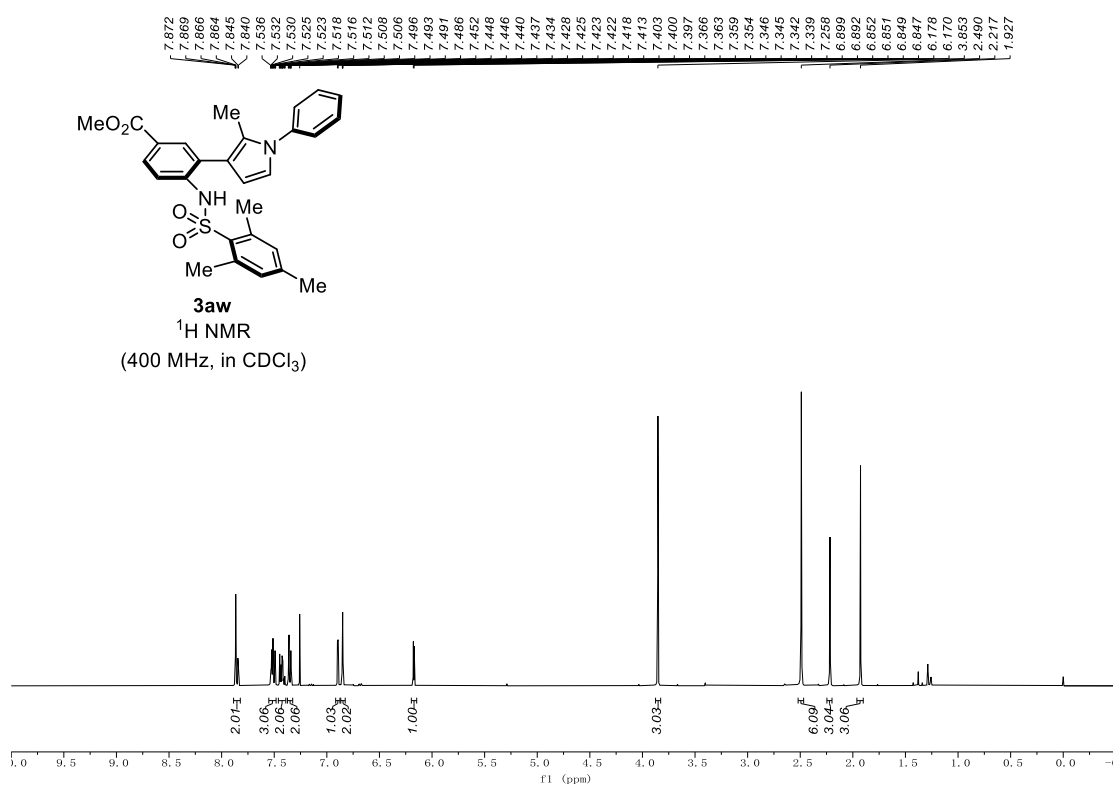



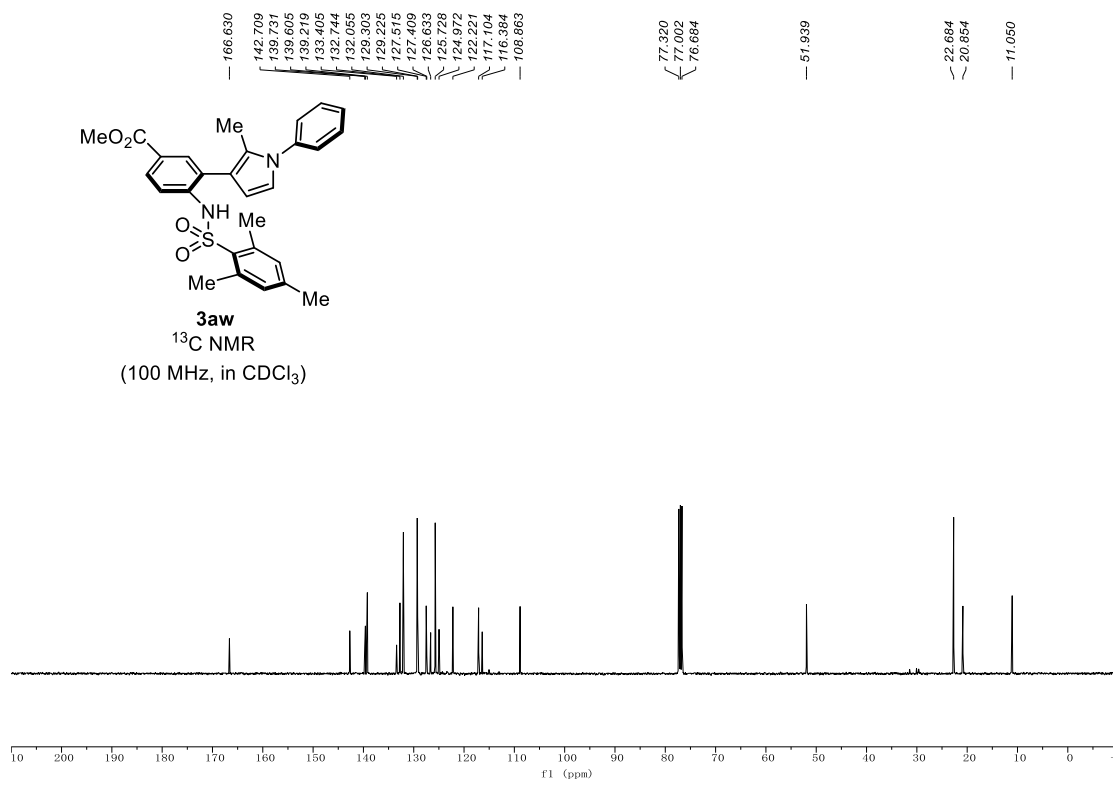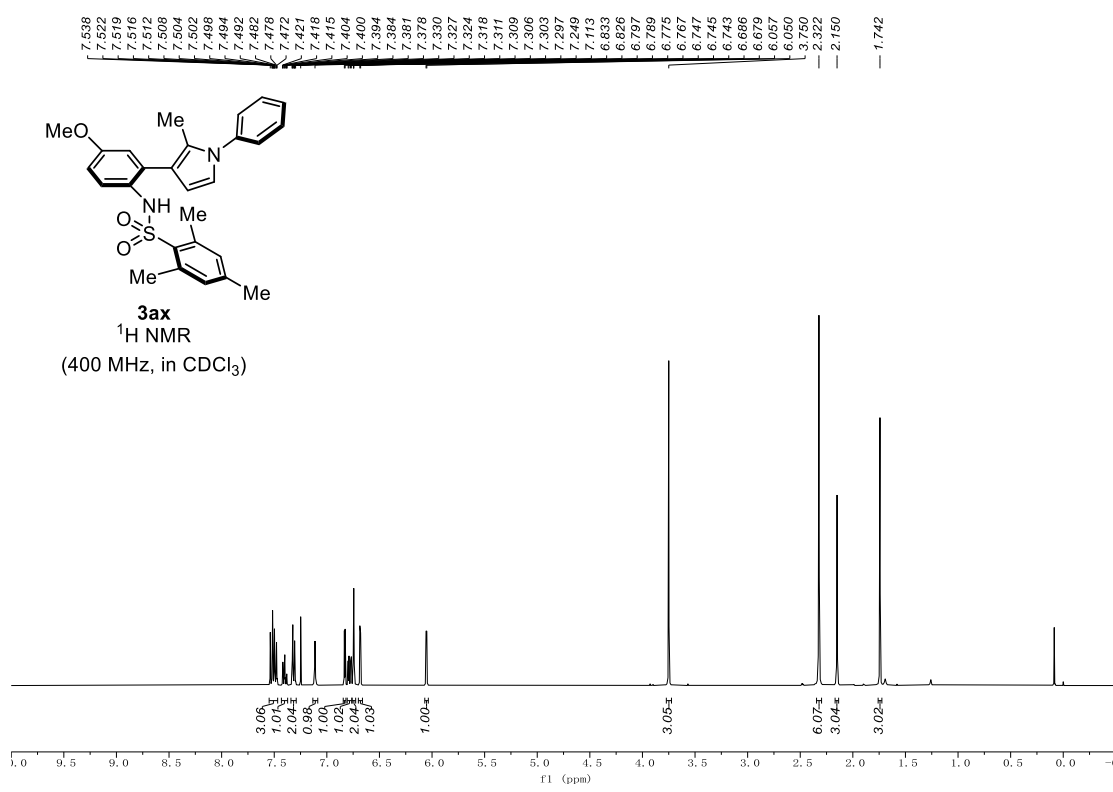

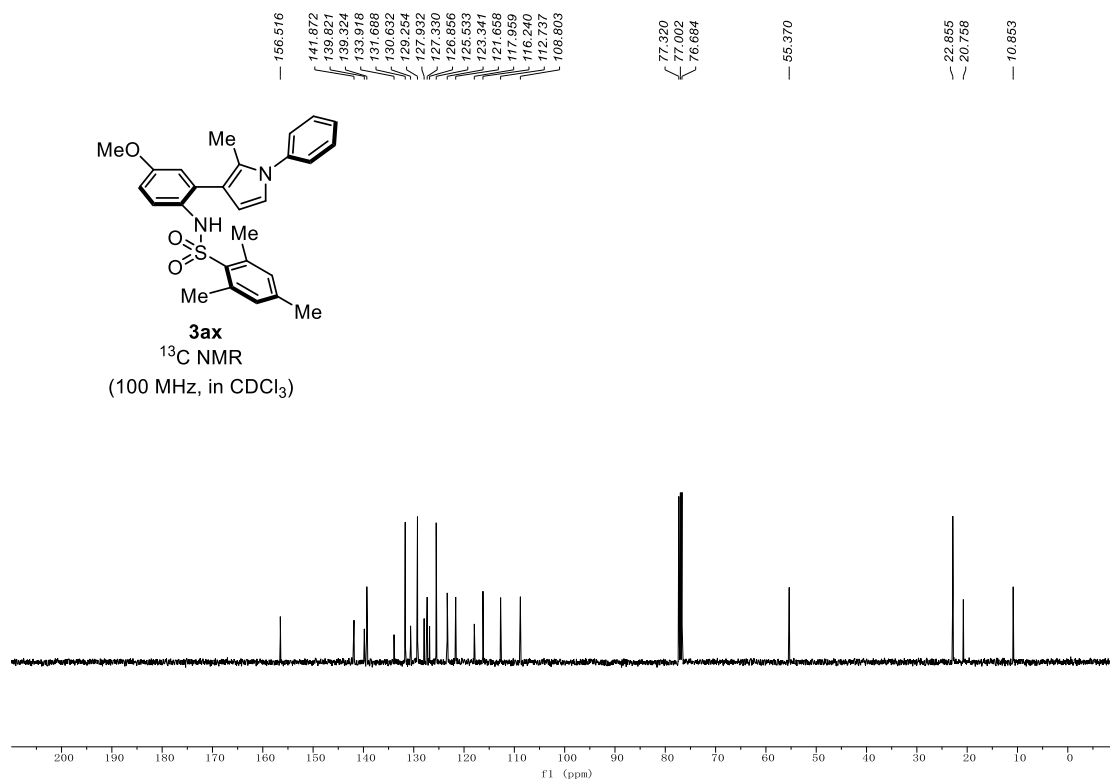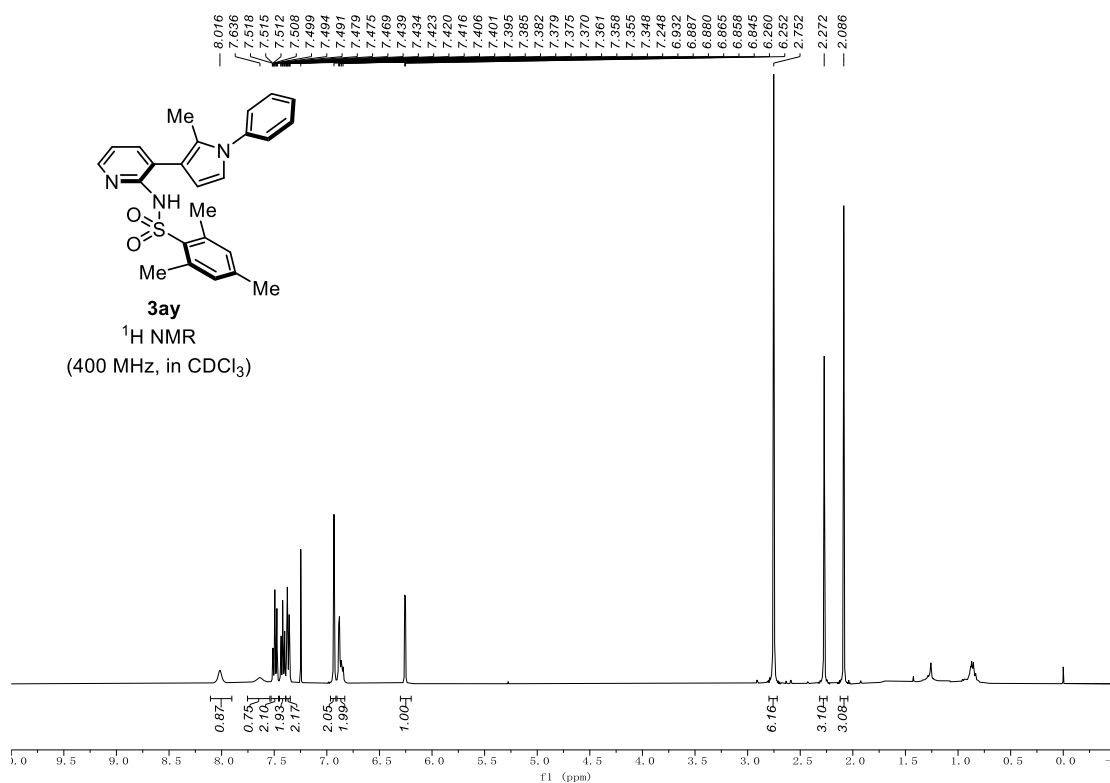

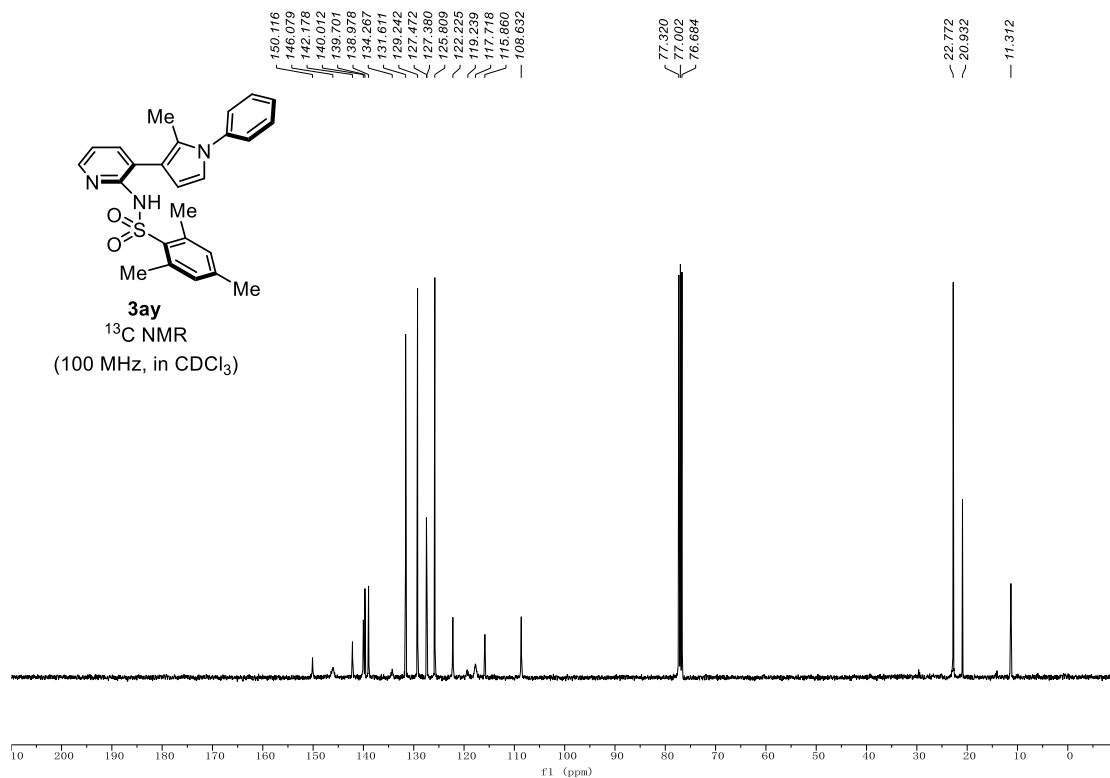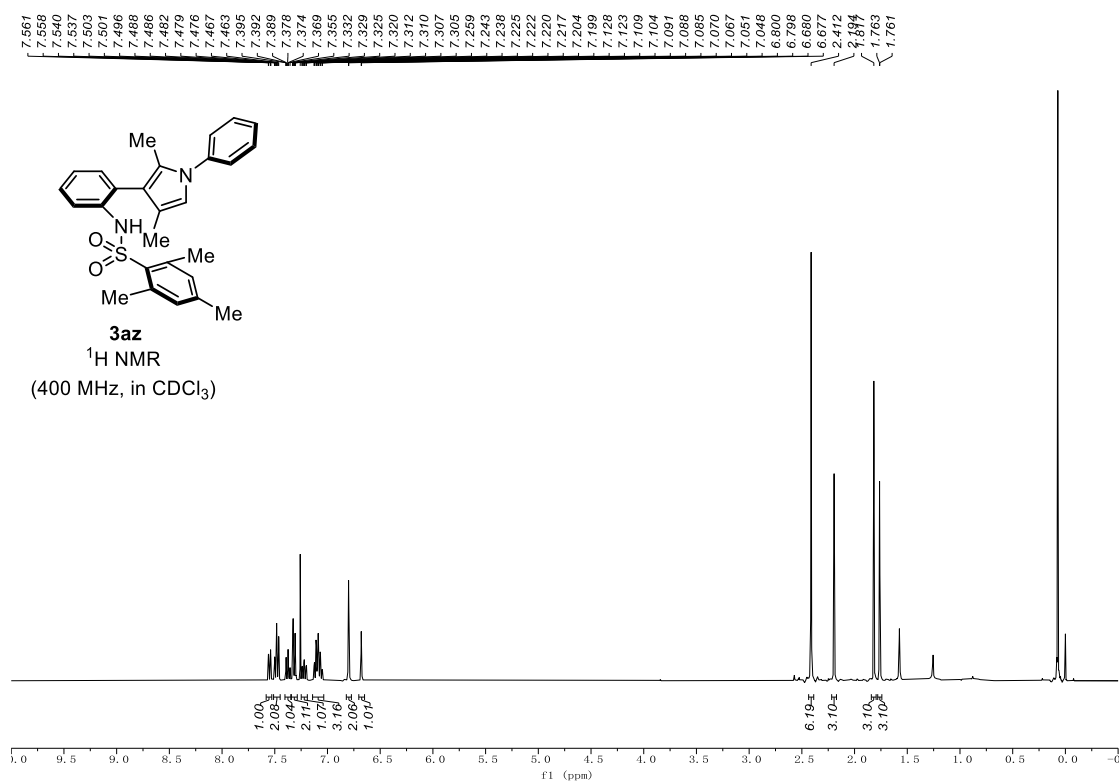

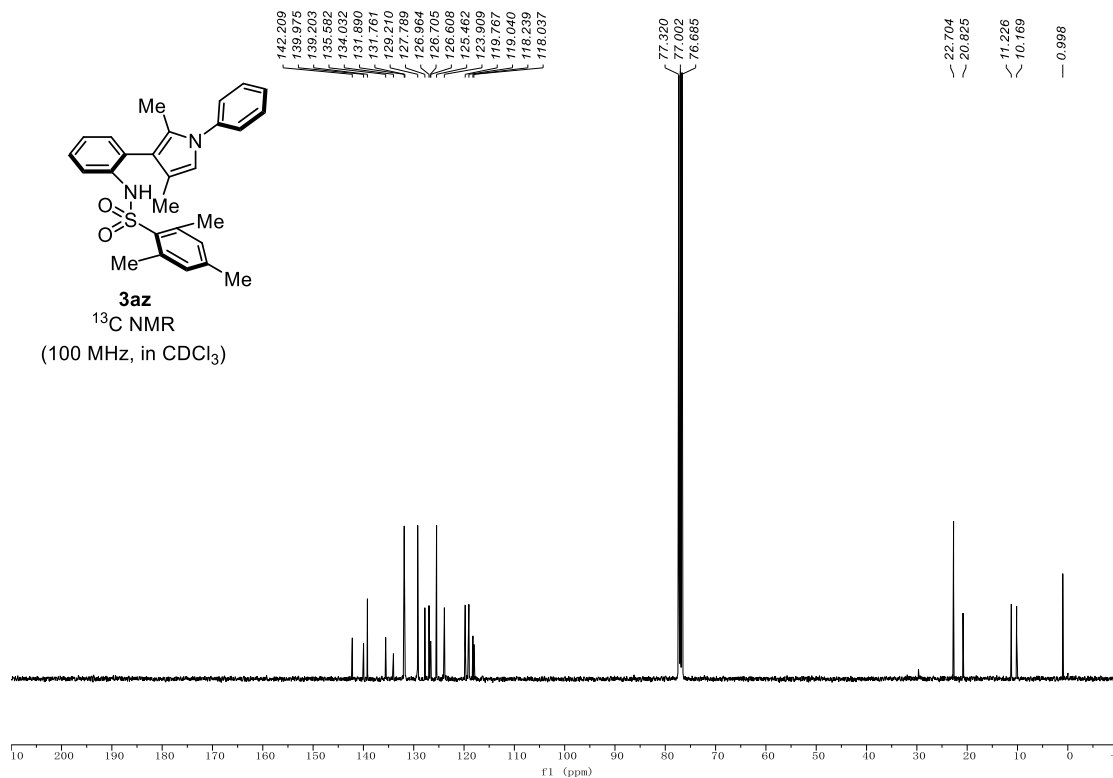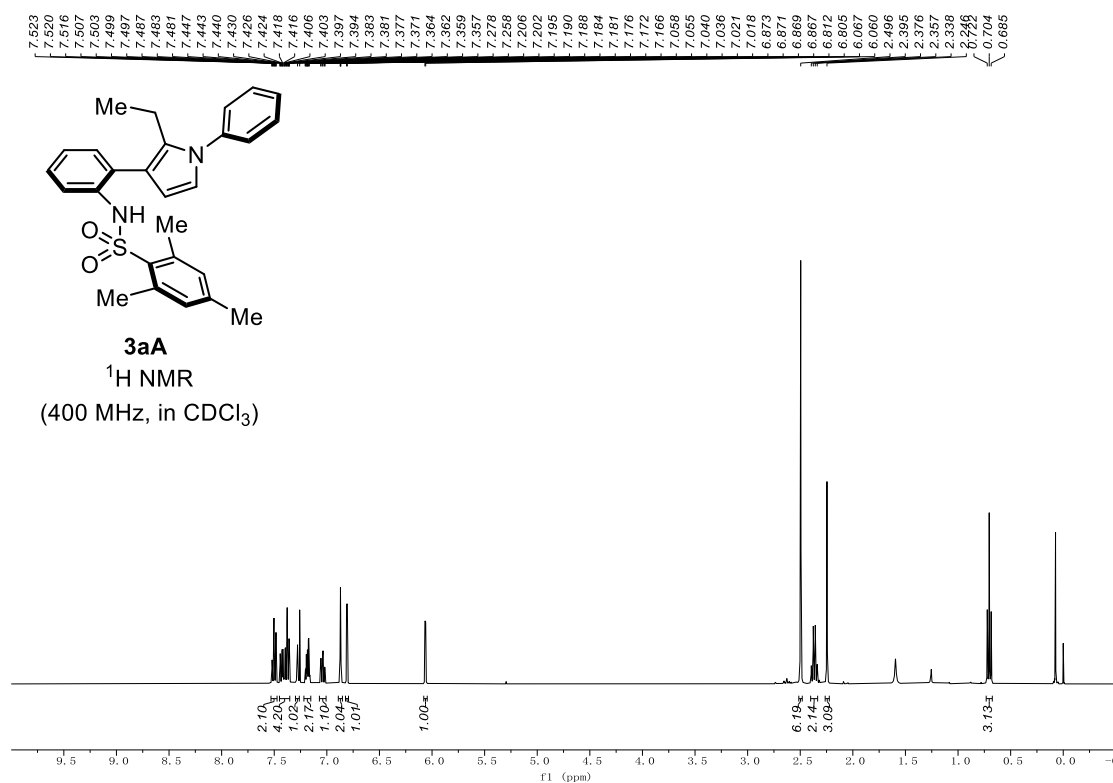

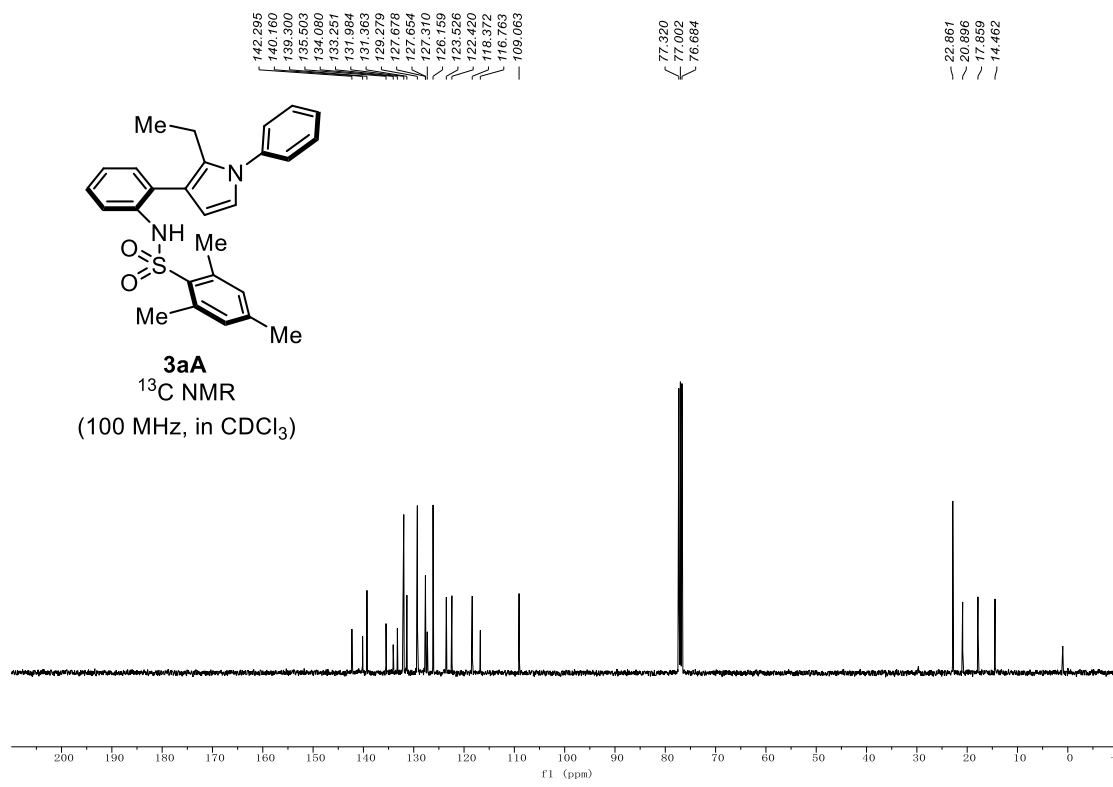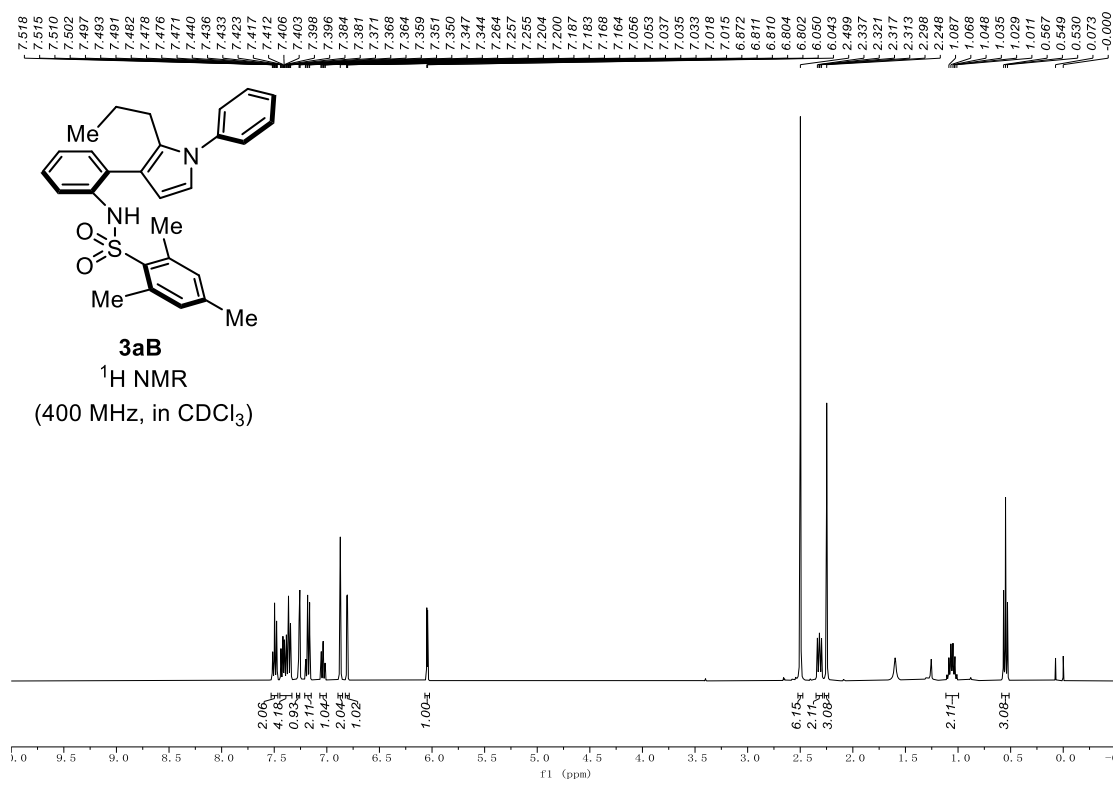

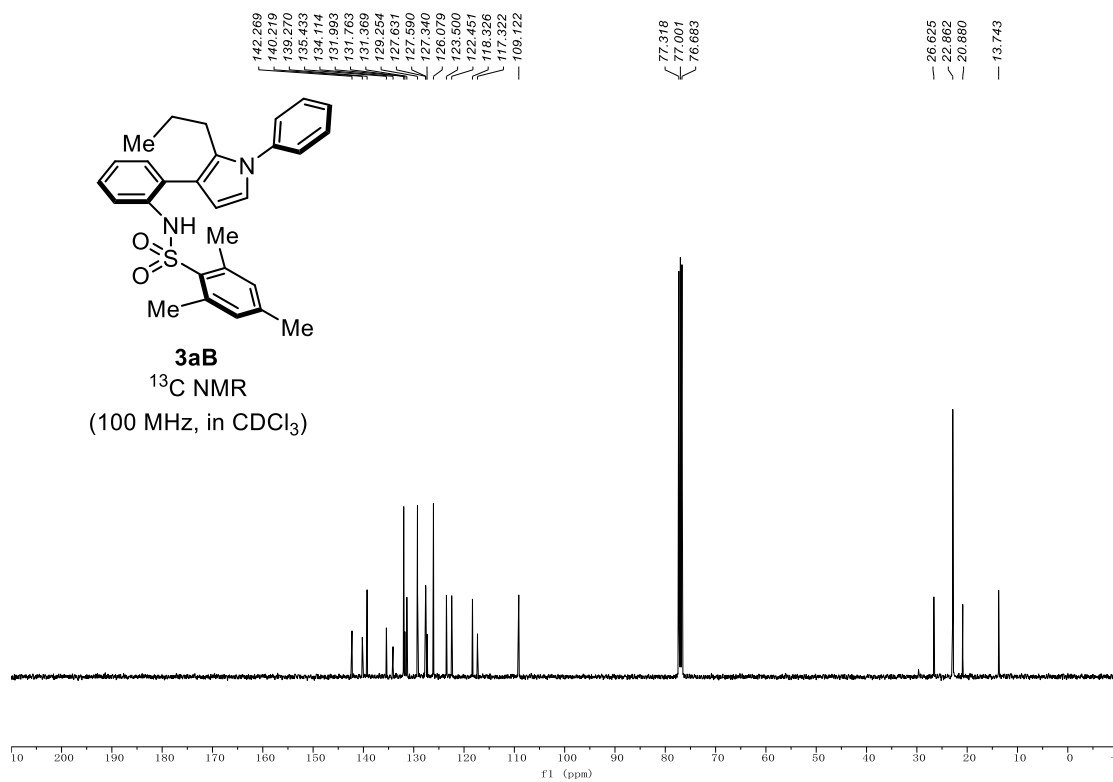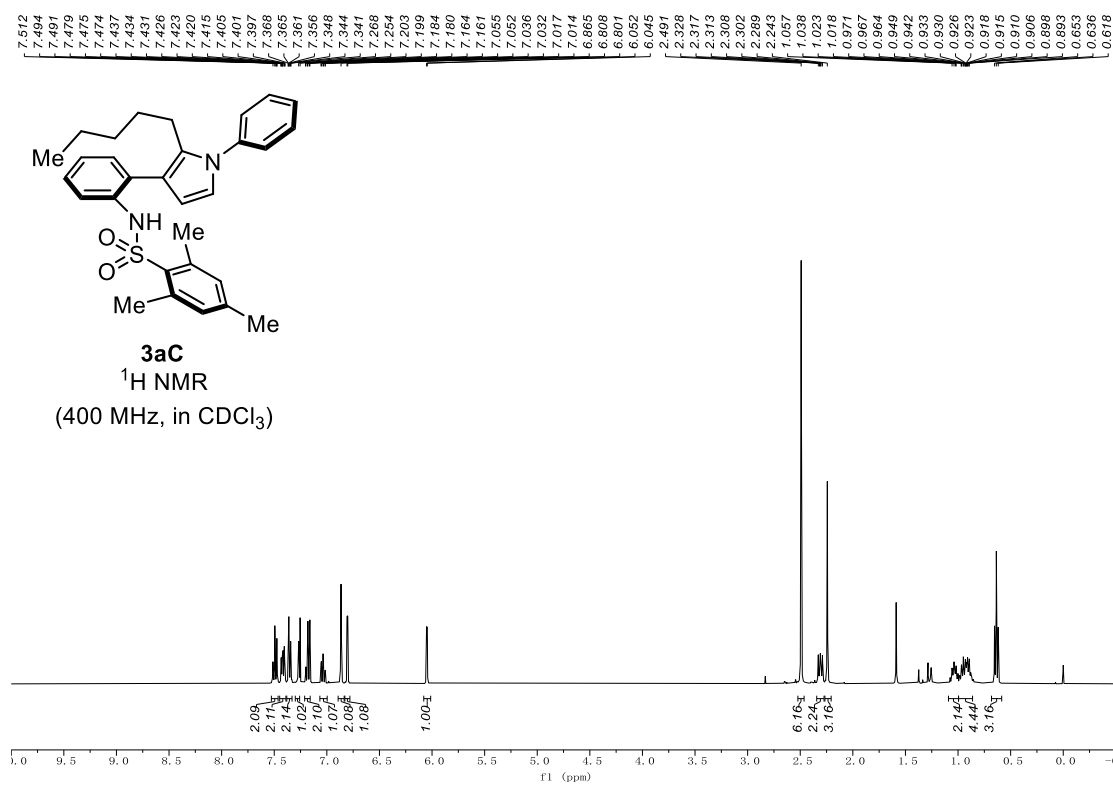

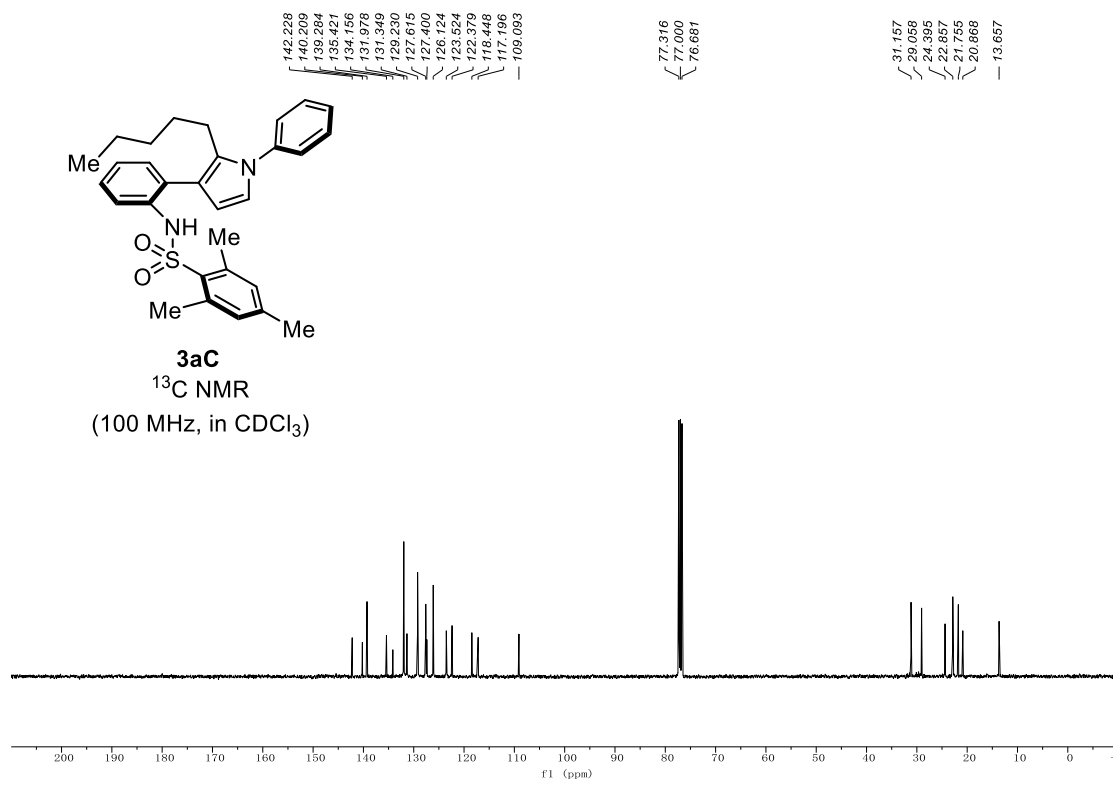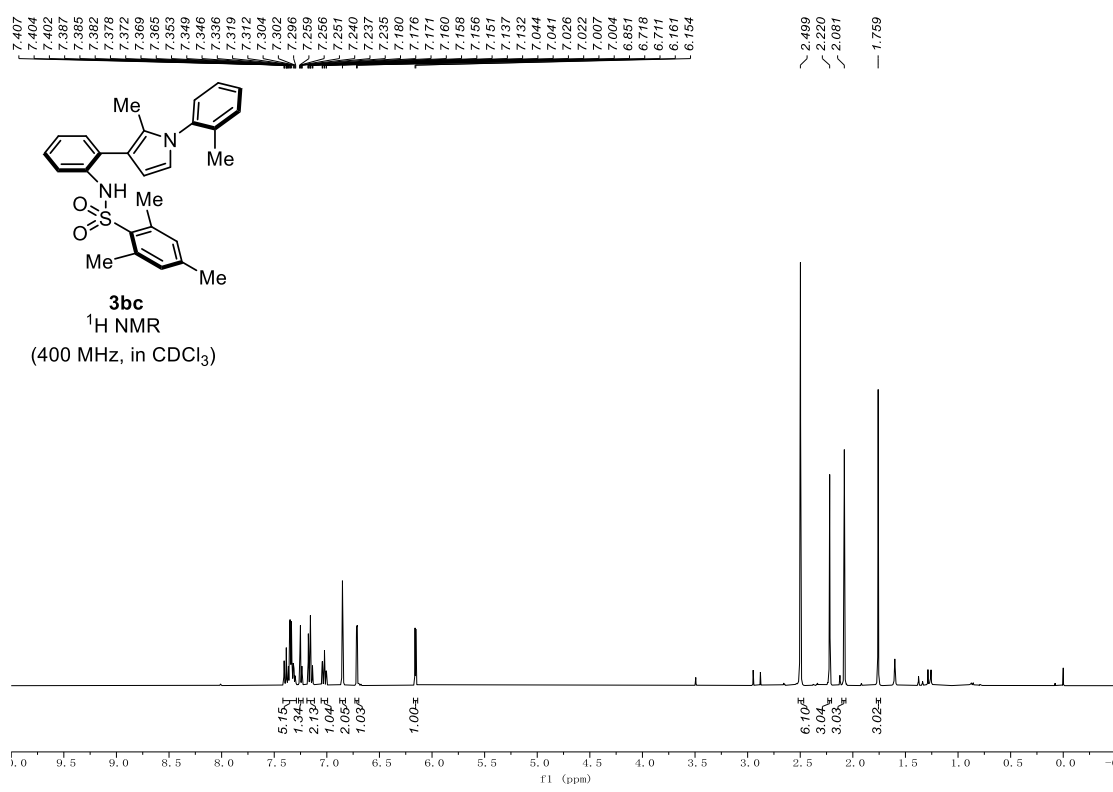

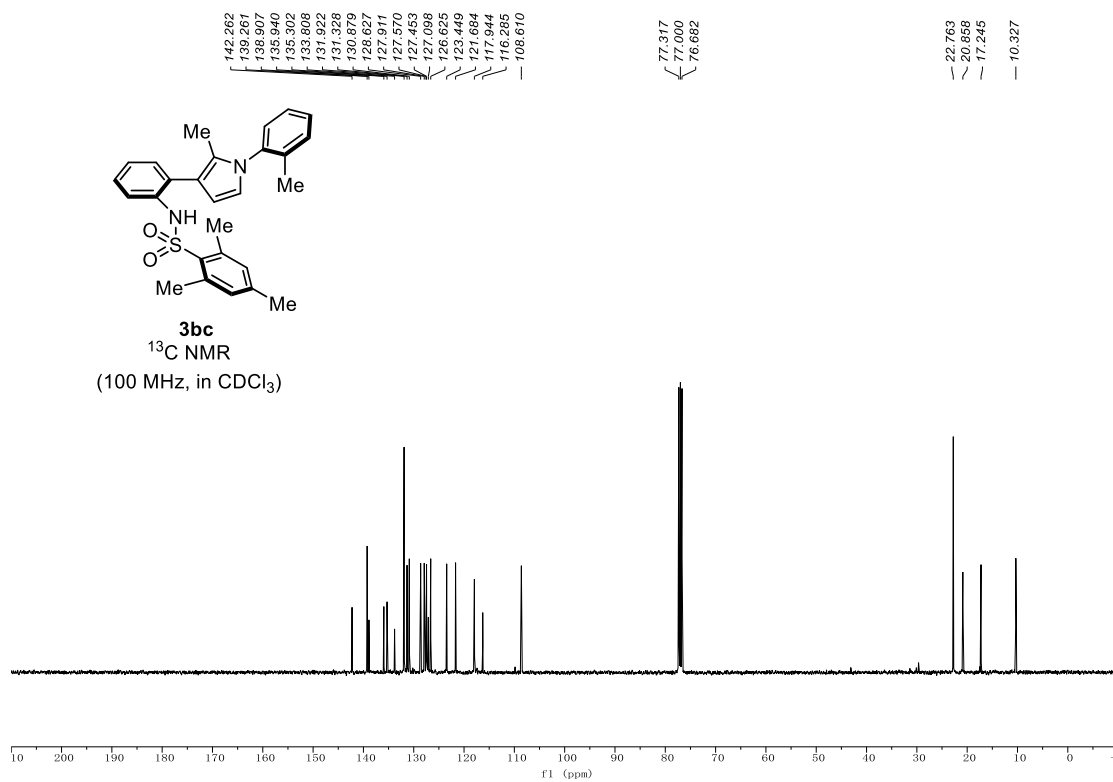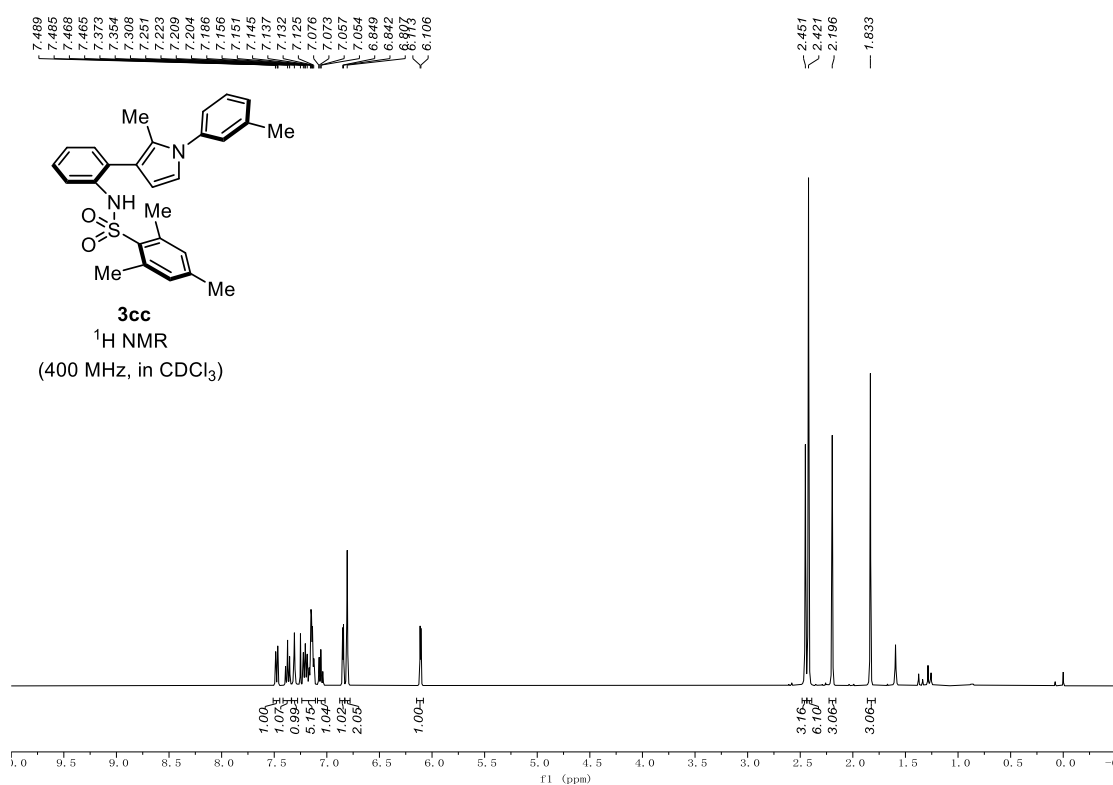



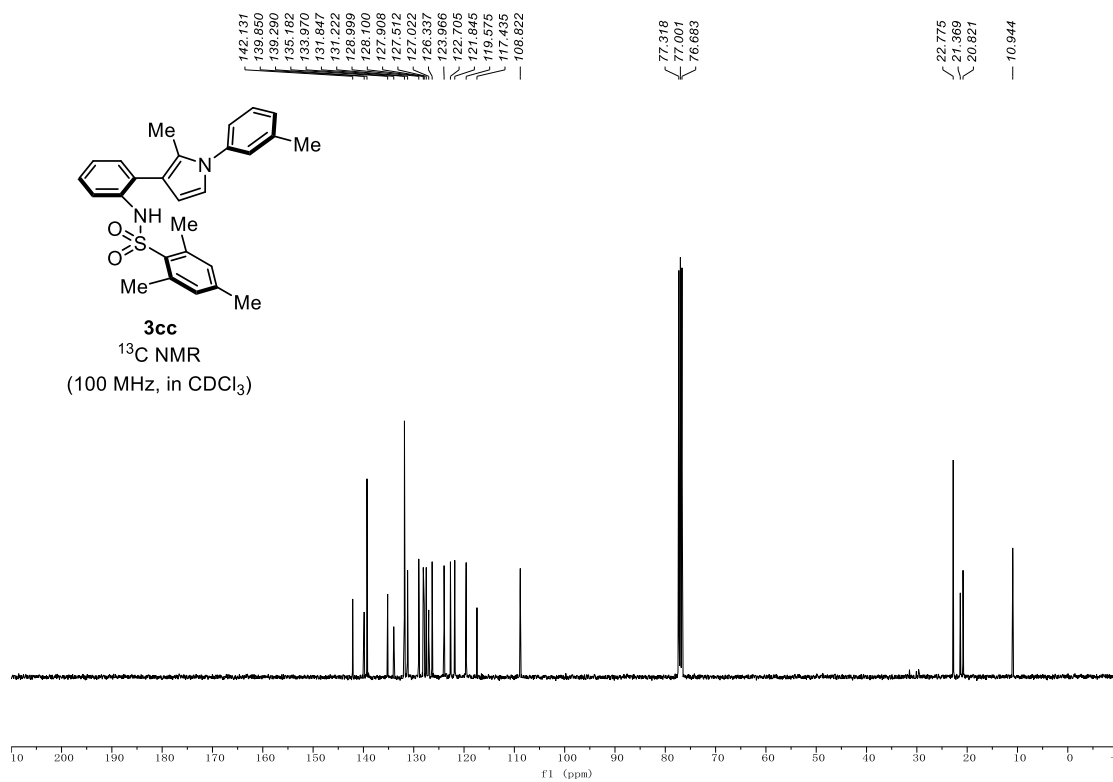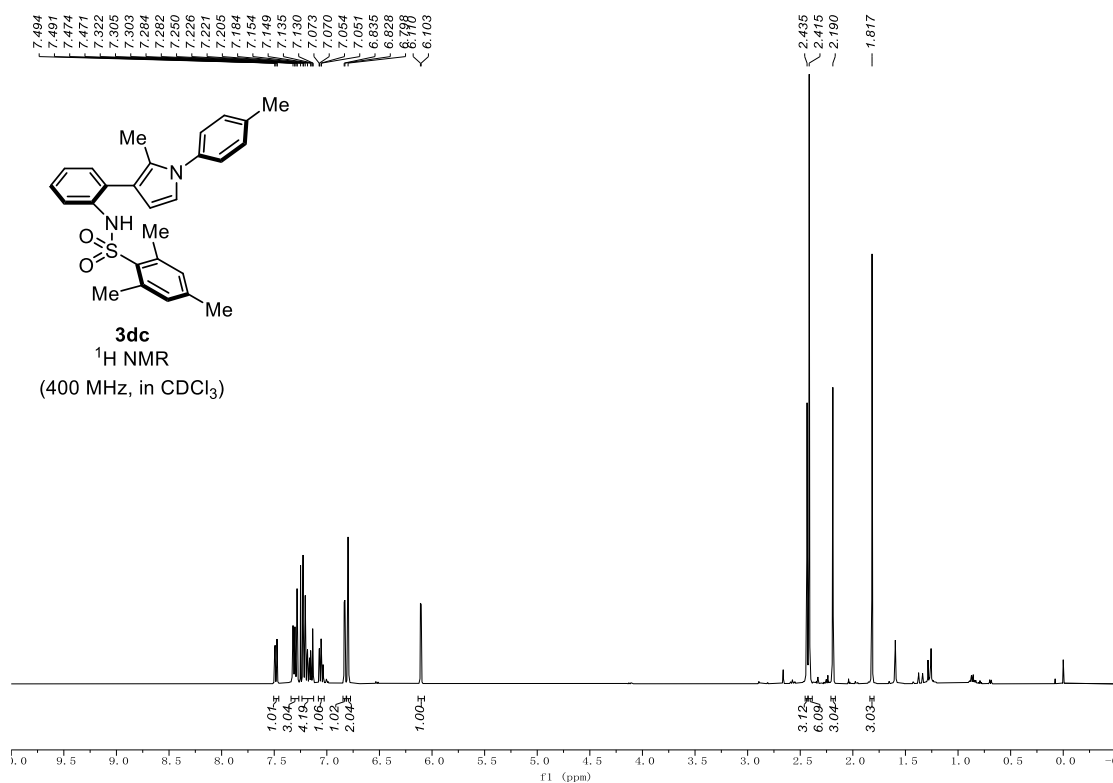

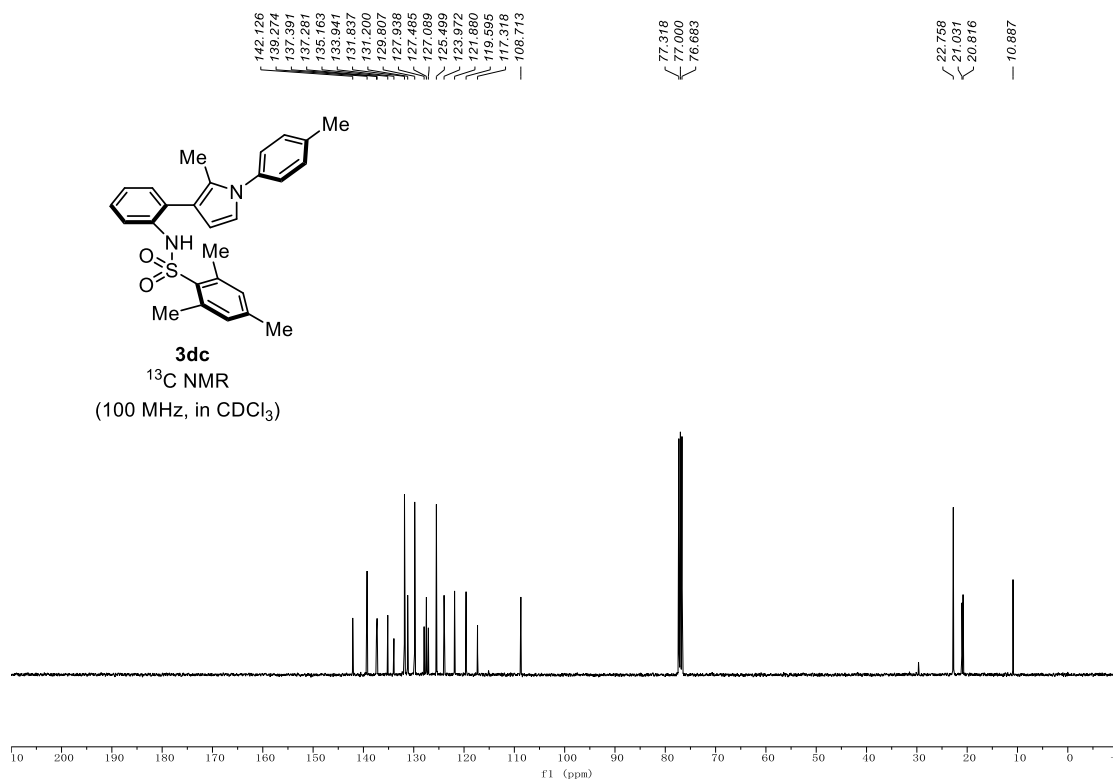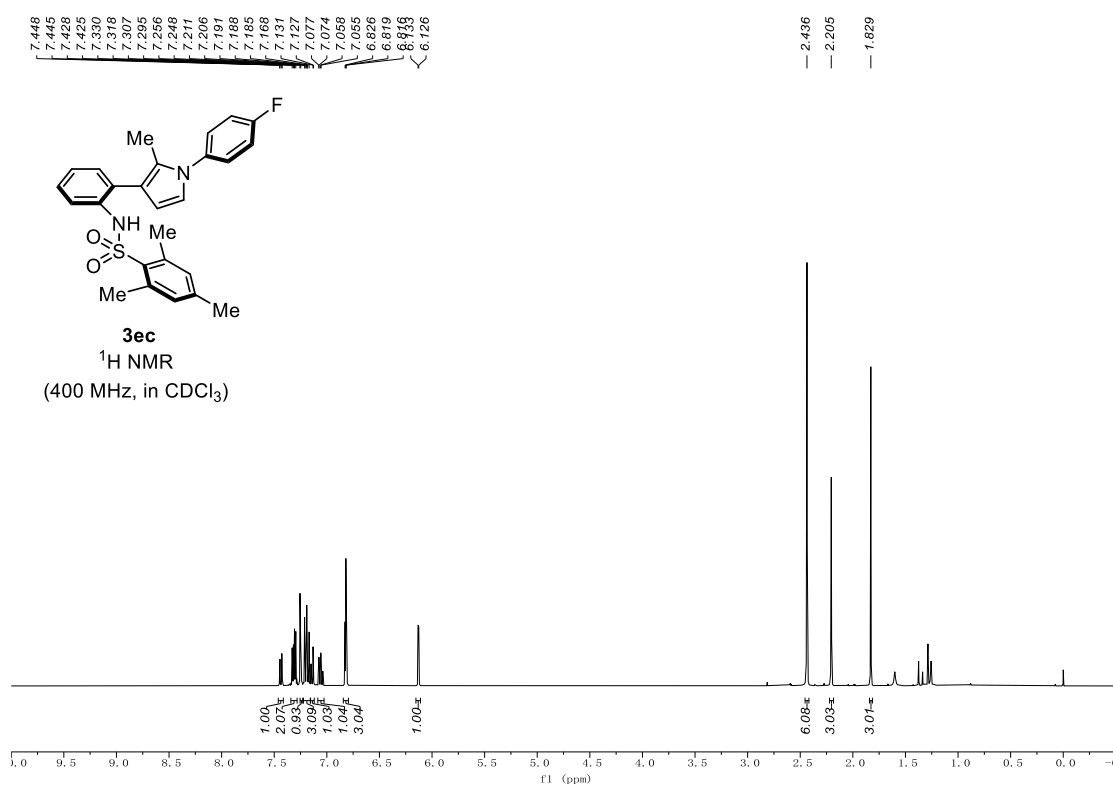

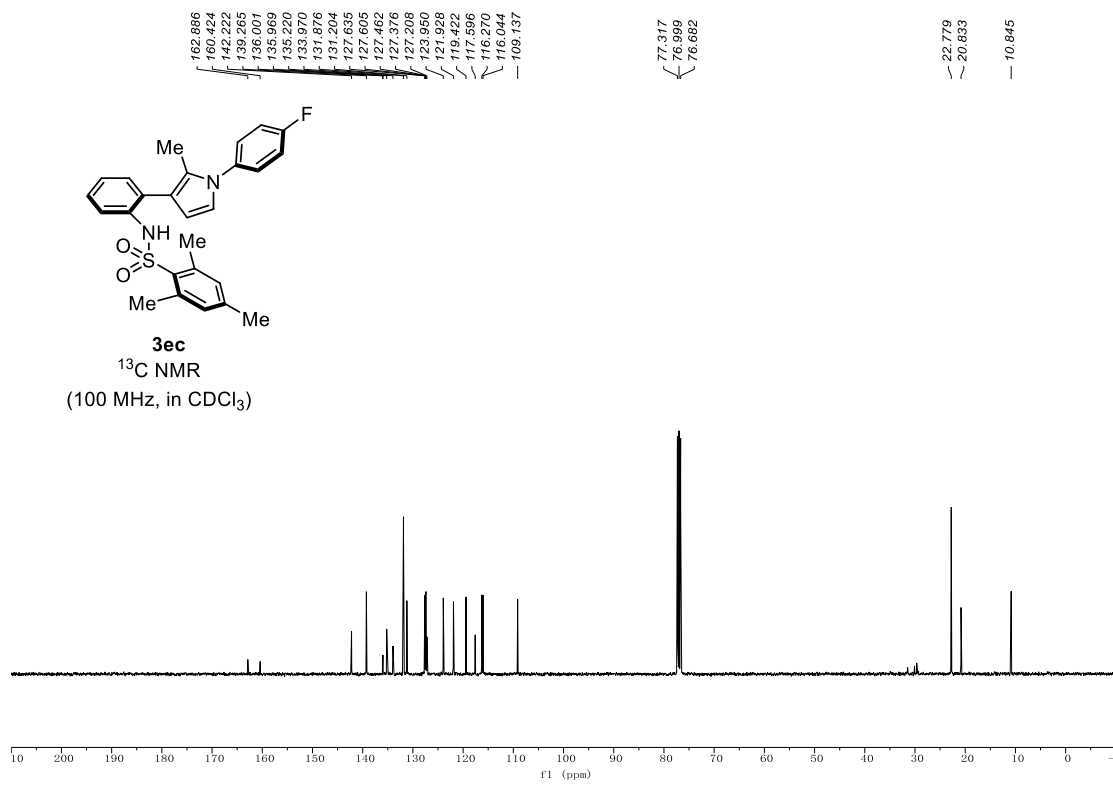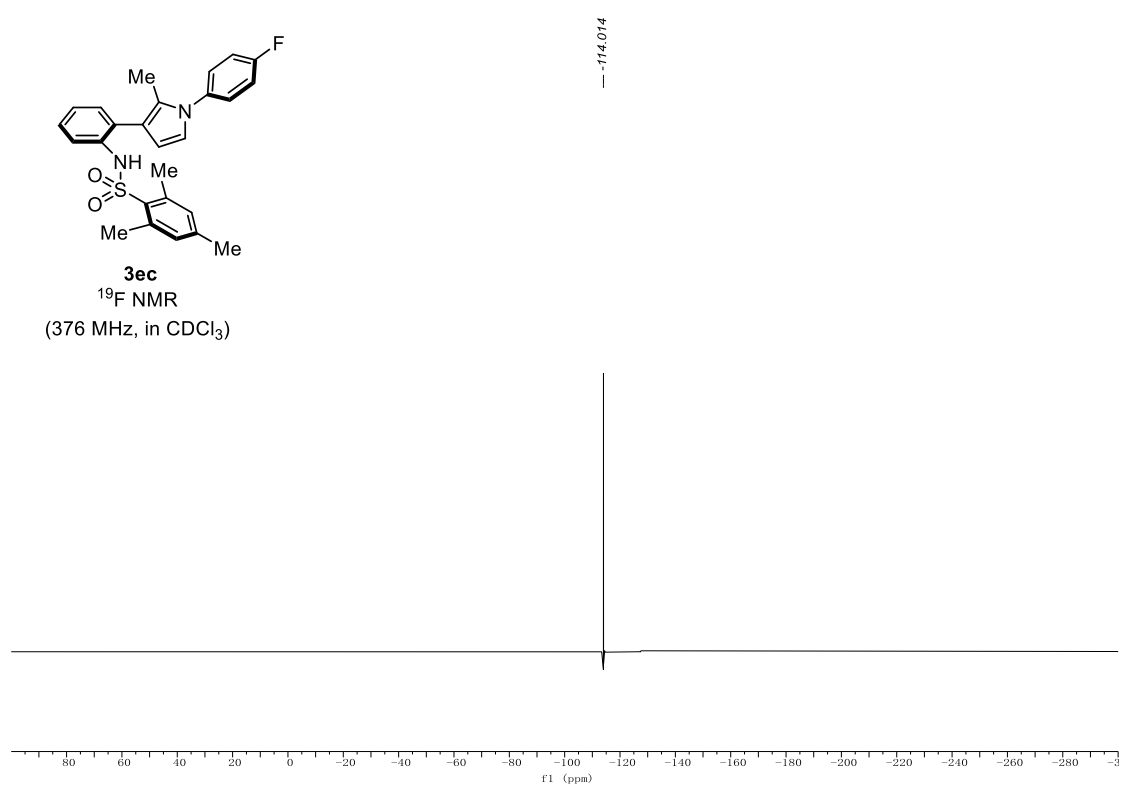

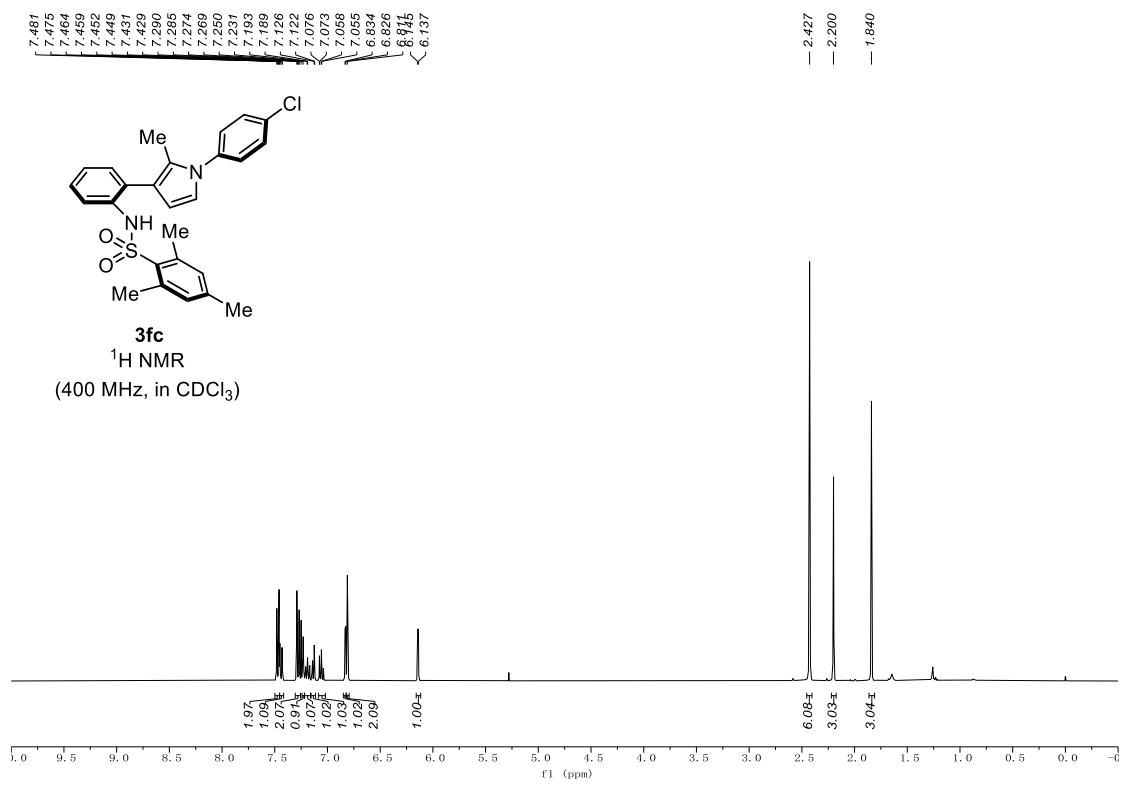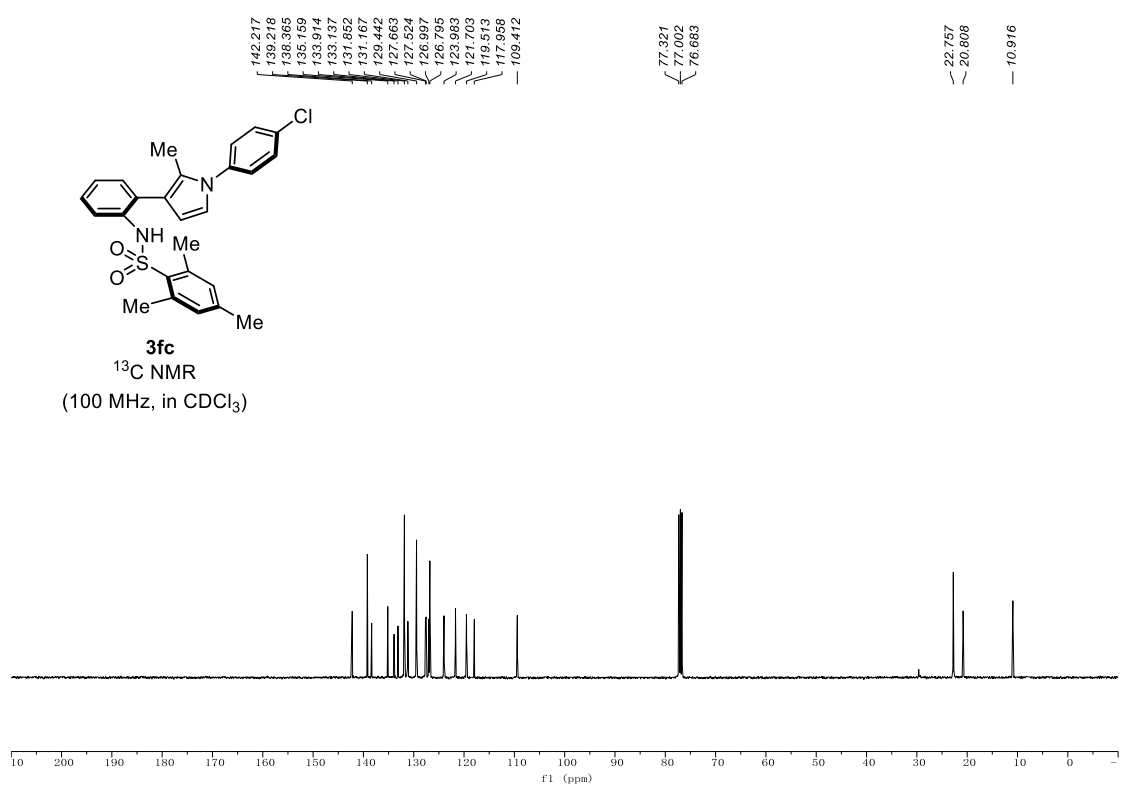

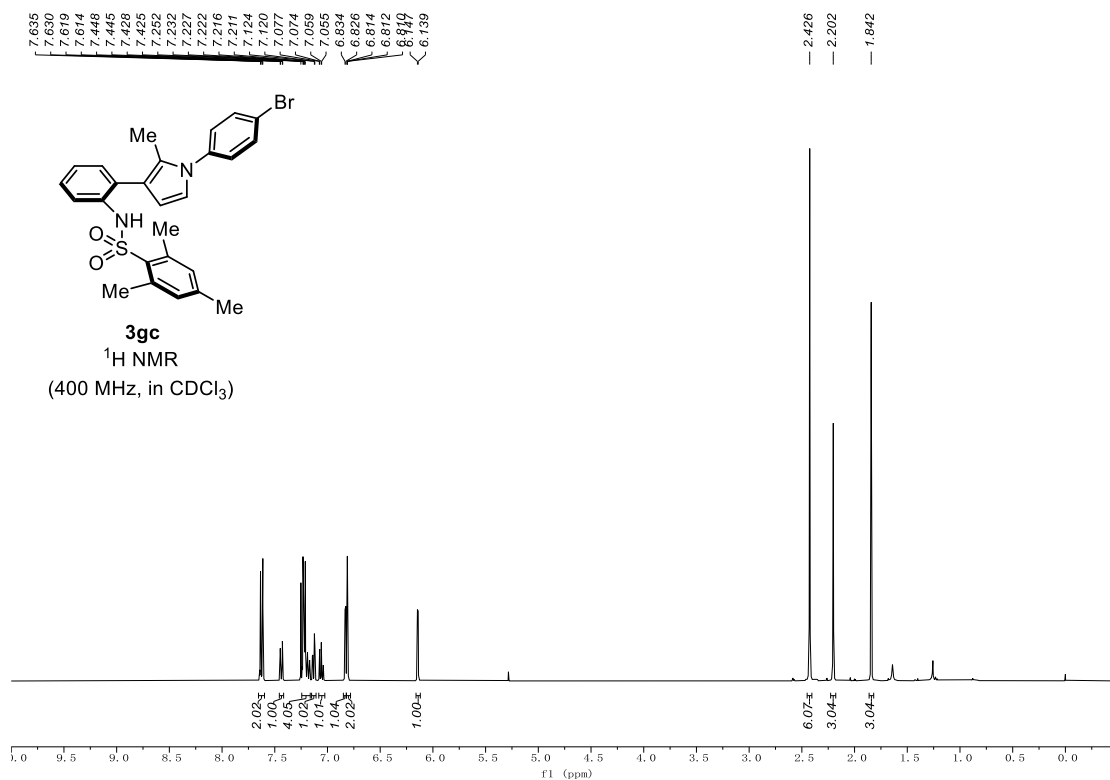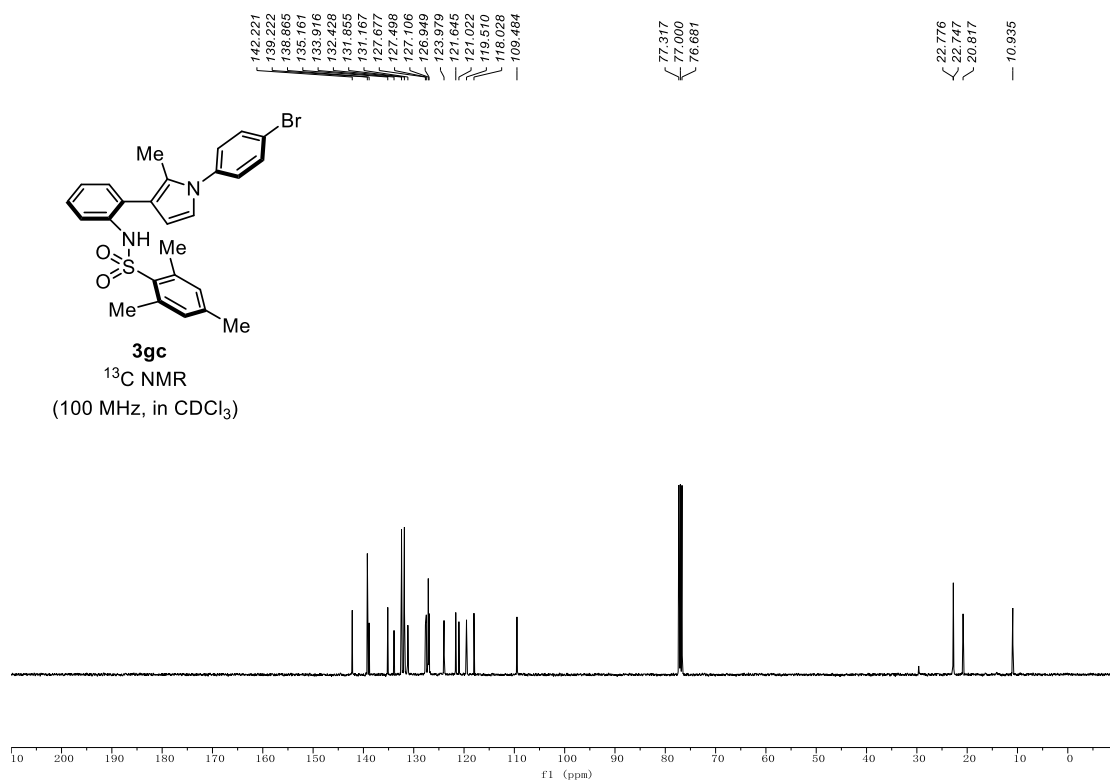

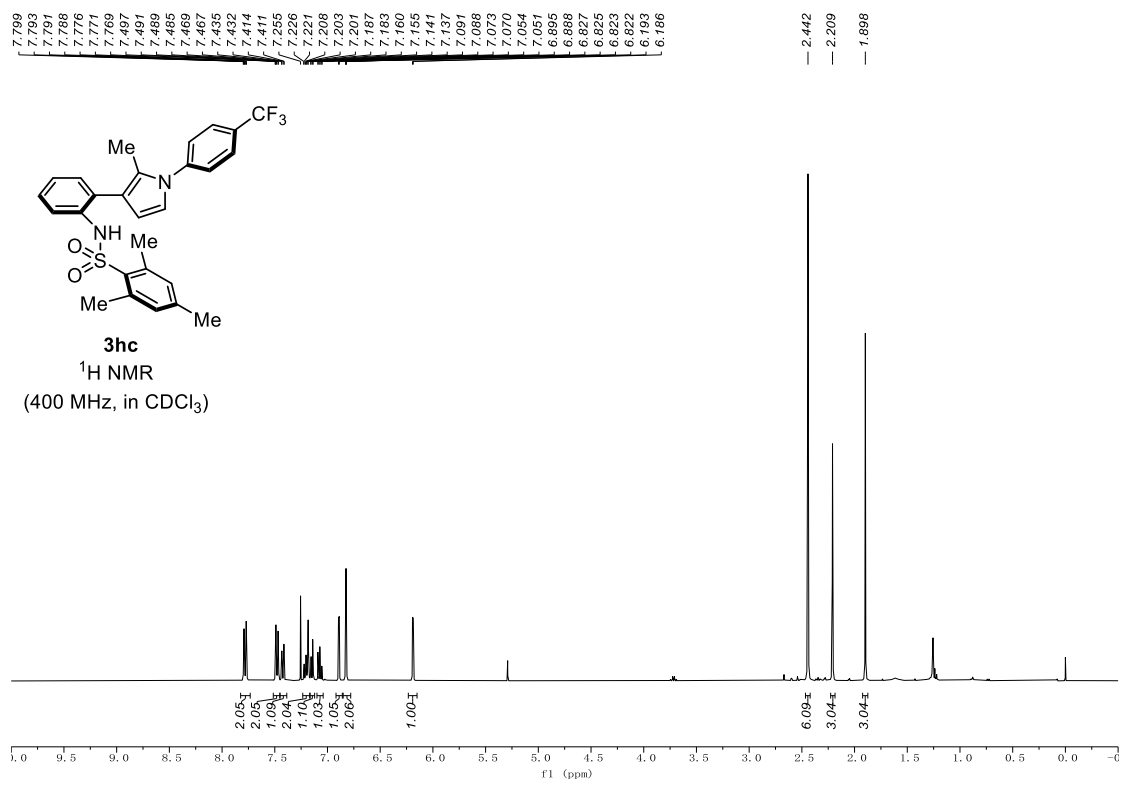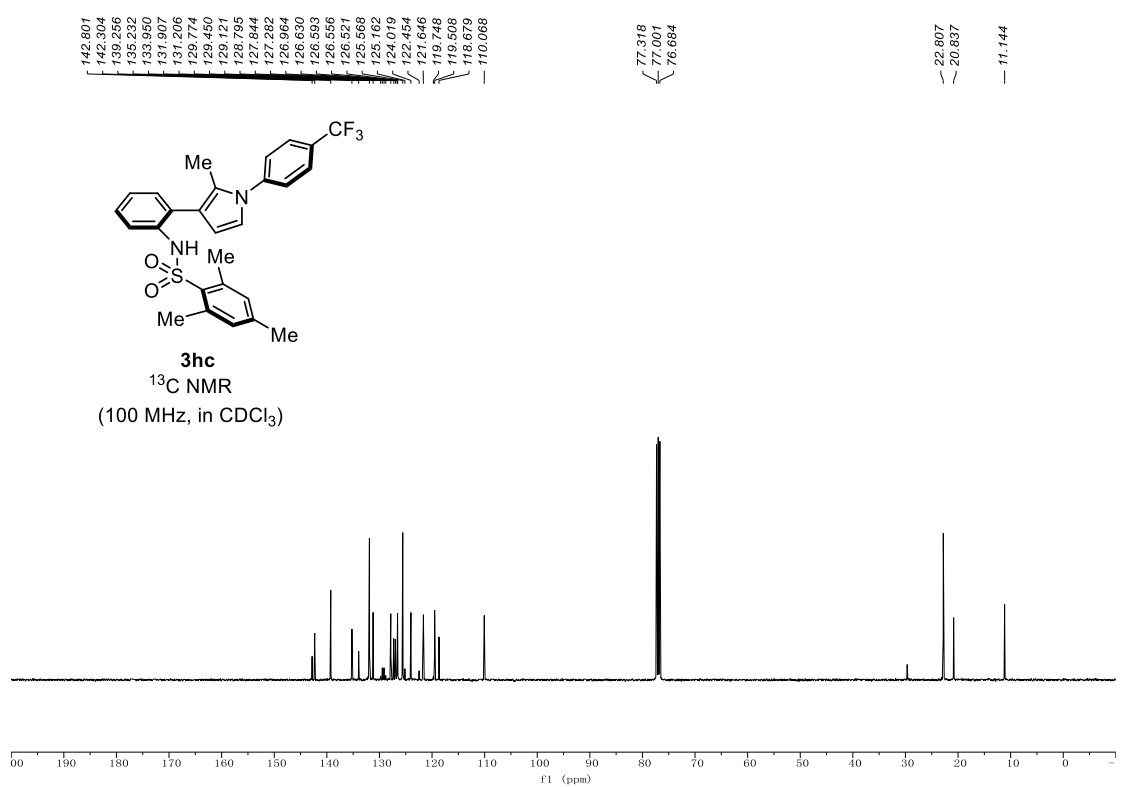

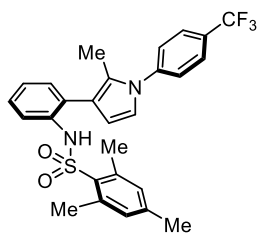

**3hc**

<sup>19</sup>F NMR

(376 MHz, in CDCl<sub>3</sub>)

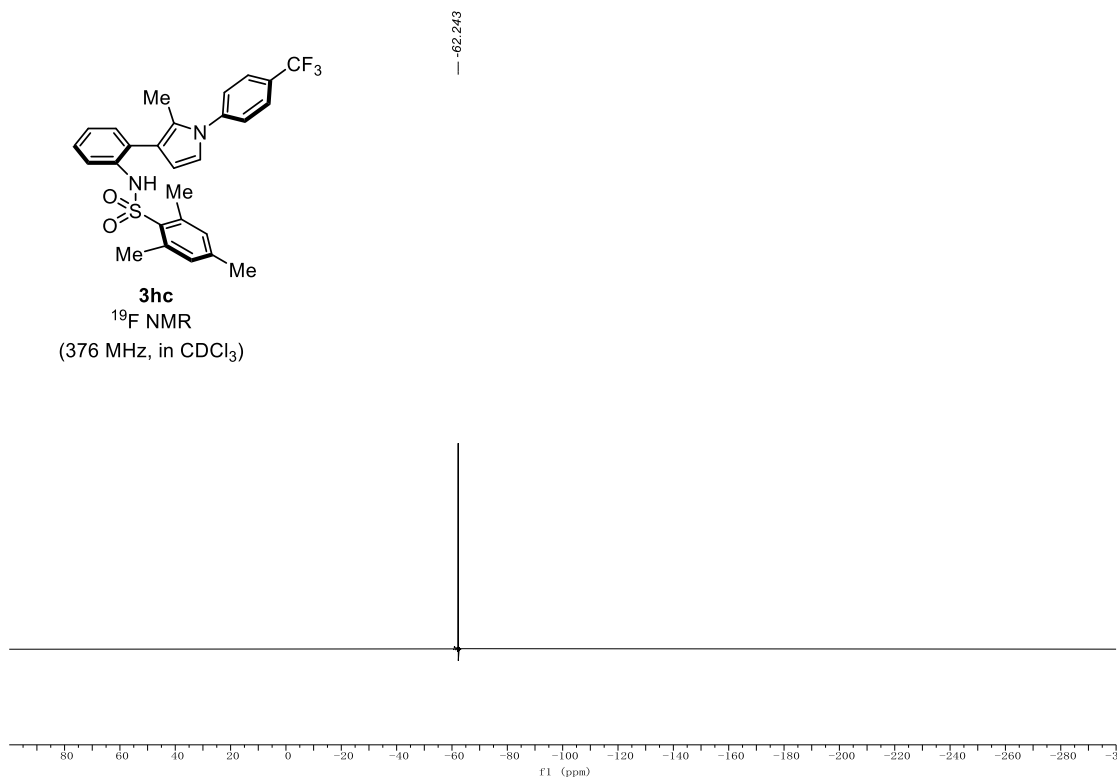

7.439  
7.436  
7.418  
7.415  
7.372  
7.367  
7.364  
7.256  
7.216  
7.213  
7.186  
7.174  
7.174  
7.154  
7.150  
7.135  
7.131  
7.083  
7.080  
7.064  
7.061  
6.851  
6.843  
6.823  
6.820  
6.151

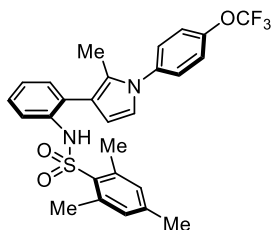

**3ic**

<sup>1</sup>H NMR

(400 MHz, in CDCl<sub>3</sub>)

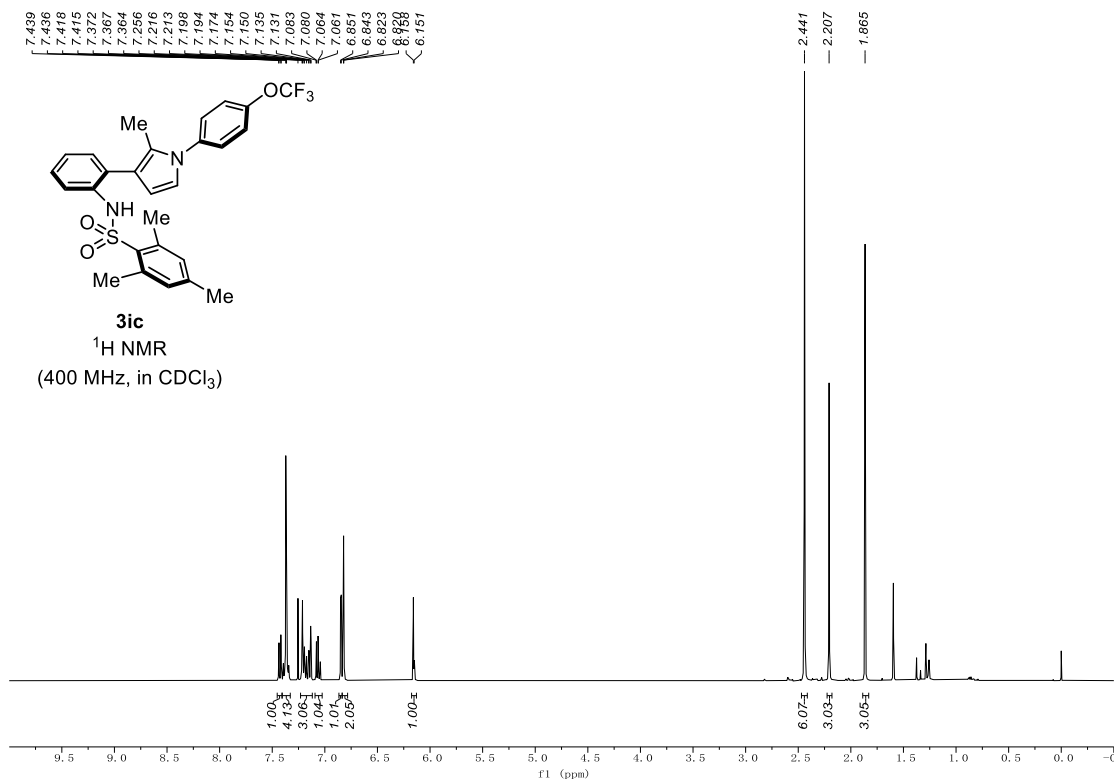

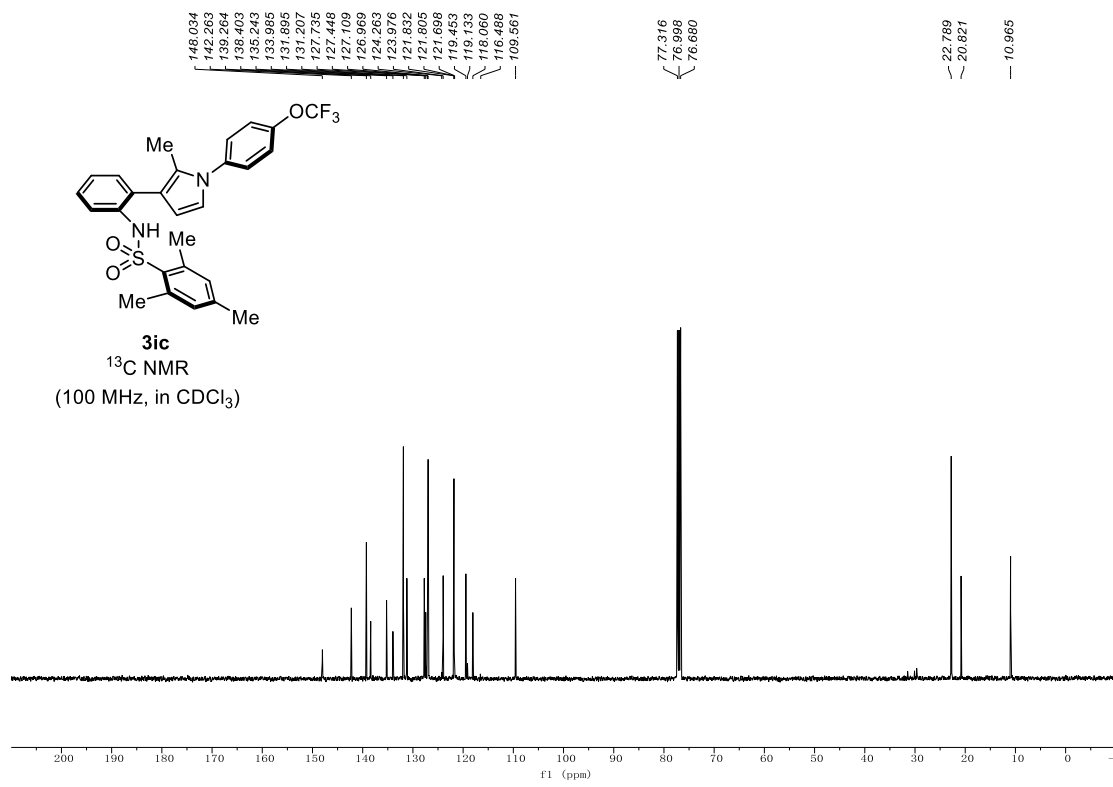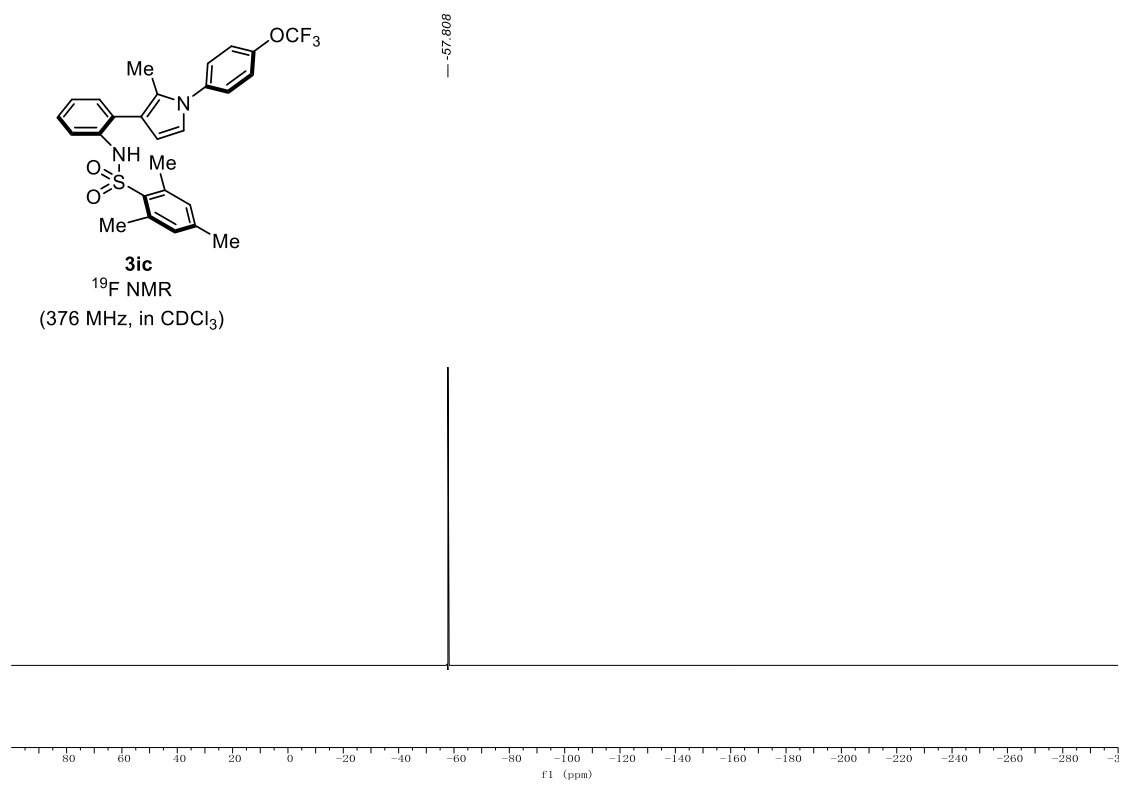



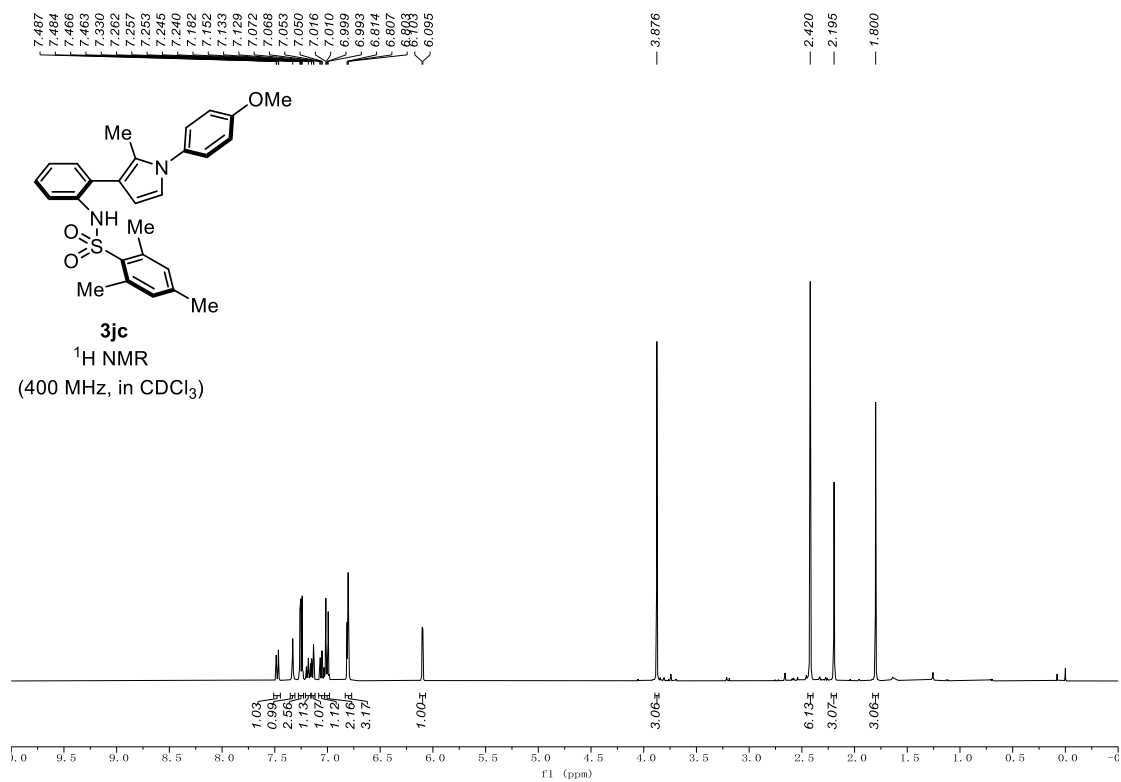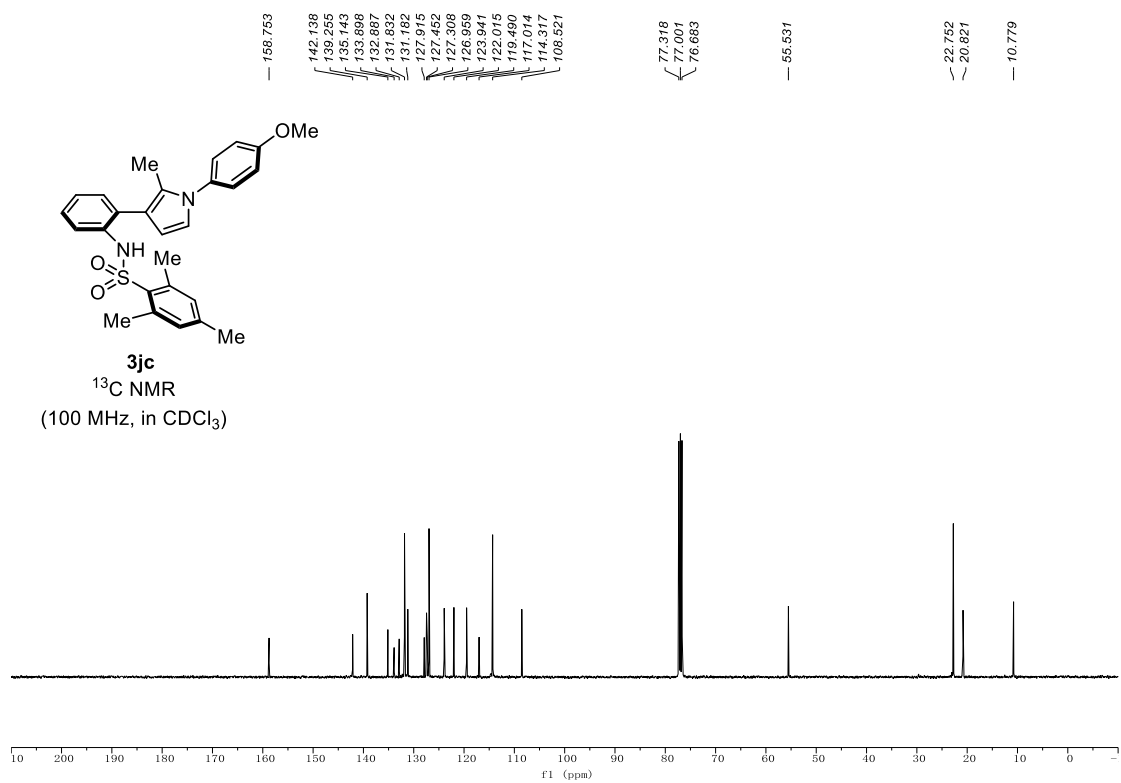

Supplement: d3qo00505d1.pdf [file d3qo00505d1.pdf]
